# Supplementary material
Source: publisher figshare collection journal article supplement (https://future-science-group.figshare.com/articles/dataset/_/22786742)
Supplement: Supplementary file 1 [file 1]

## Sheet: DEGs
DEGs based on GSE53431	id	logFC	adj.P.Val
	POSTN	-0.52801	2.34e-09
	SCARA5	-0.51595	1.21e-10
	TNNI2	-0.513172	2.48e-06
	KRT77	-0.501807	1.38e-07
	CACNA1H	-0.474651	9.77e-08
	C9orf61	-0.473053	4.68e-08
	OSR1	-0.424018	2.5e-08
	PAPLN	-0.422858	2.53e-06
	BTC	-0.413806	2.45e-06
	IGFBP5	-0.407532	1.11e-07
	KIAA1683	-0.395265	2.32e-06
	LCE5A	-0.377202	0.000180127
	CLDN23	-0.370743	5.05e-06
	ADRB2	-0.370402	5.09e-06
	CHAD	-0.358563	1.26e-11
	H19	-0.35789	0.000368749
	CLDN8	-0.356562	4.2e-06
	FHL1	-0.353823	3.61e-08
	PAMR1	-0.353062	2.57e-07
	CRABP1	-0.344944	1.82e-08
	MAMDC2	-0.343749	7.27e-05
	ZNF471	-0.343182	2.18e-08
	ZSCAN18	-0.339241	9.12e-10
	ZNF135	-0.338673	1.61e-07
	MT4	-0.337309	0.0119706
	PRODH	-0.337269	2.25e-07
	PCDH21	-0.333218	1.2e-05
	SVEP1	-0.332721	2.25e-07
	GSTM3	-0.331087	4.59e-06
	LAMC3	-0.330852	1.82e-06
	ZNF559	-0.327772	4.39e-08
	ZNF573	-0.326116	9.92e-07
	CSPG4	-0.325546	2.42e-06
	KRT31	-0.323481	5.29e-05
	ADH1A	-0.319282	2.11e-07
	IL34	-0.317885	2e-07
	CGNL1	-0.315881	3.34e-08
	CLEC2A	-0.314576	8.39e-06
	PNPLA7	-0.313848	4.86e-05
	SYT17	-0.312755	6.17e-08
	ESPN	-0.306424	1.98e-05
	GPC2	-0.306389	3.18e-06
	TMEM47	-0.305771	7.18e-08
	CCL27	-0.302851	0.000220653
	ZNF83	-0.301615	4.13e-07
	SSPN	-0.301297	4.32e-08
	LOC647543	-0.300974	2.73e-06
	ID4	-0.297523	2.23e-06
	PLCH2	-0.292296	1.35e-07
	ZNF204	-0.290296	5.66e-07
	FLJ35220	-0.290211	5.73e-07
	APOD	-0.288195	0.000451275
	C20orf46	-0.286919	8.66e-06
	TTC38	-0.286779	1.03e-10
	FLJ35258	-0.285751	3.07e-09
	LOC100131541	-0.285708	2.05e-05
	BCAR3	-0.280819	3.1e-07
	NTM	-0.280592	1.67e-09
	ACADL	-0.280286	3.34e-08
	SLIT2	-0.279336	2.5e-08
	WNT3A	-0.278244	2.5e-06
	LOC730994	-0.277216	4.09e-06
	LOC400304	-0.277014	1.45e-05
	CYP2J2	-0.276133	2.8e-05
	PDGFC	-0.275949	2.83e-06
	LOC732450	-0.275366	6.01e-07
	ZNF540	-0.275159	1.53e-07
	FLJ20699	-0.274832	1.9e-10
	CRY2	-0.274309	3.64e-07
	SPRY2	-0.273441	1.61e-08
	LOC100133866	-0.27339	1.63e-05
	FAM179A	-0.273129	2.09e-05
	CMYA5	-0.27274	5.22e-05
	LAMB4	-0.271284	0.000414973
	NTF5	-0.271019	1.82e-07
	LOC728537	-0.269917	2.6e-05
	ABI3BP	-0.26949	7.87e-07
	GATA3	-0.266991	5.99e-07
	LOC642373	-0.265386	0.00145466
	BTBD16	-0.264789	0.00142178
	SNORD13	-0.264546	2.25e-06
	AMT	-0.264276	3.33e-06
	ACACB	-0.263498	2.23e-06
	RNF150	-0.263041	2.98e-07
	C14orf132	-0.262089	9.12e-05
	LOC643669	-0.260286	3.88e-06
	GJB4	-0.259616	0.00227662
	BOC	-0.259417	1.11e-05
	SLIT3	-0.258542	9.49e-07
	FRMD4A	-0.258536	4.44e-09
	C1orf51	-0.258483	0.000940419
	SARM1	-0.258369	4.65e-08
	LOC221442	-0.257179	1.08e-06
	ZNF525	-0.256804	5.55e-08
	LOC100128974	-0.256473	1.46e-05
	LOC100190939	-0.255459	8.62e-06
	LOC727948	-0.253968	2.22e-06
	CYSLTR1	-0.253462	7.01e-09
	LOC646100	-0.253223	1.5e-05
	PELI2	-0.253001	8.33e-07
	RECK	-0.252819	4.48e-08
	YBX2	-0.251159	9.64e-08
	CILP	-0.250401	1.99e-05
	TMEM132B	-0.249371	5.13e-08
	PHLDB1	-0.248475	1.9e-07
	NCRNA00085	-0.247233	6.4e-08
	MYOM2	-0.247029	0.000358723
	BMP8B	-0.246262	2.83e-06
	C6orf26	-0.246111	6.97e-07
	FHOD3	-0.245762	1.24e-06
	LOC730995	-0.245117	2.11e-07
	PLAC9	-0.244471	1.23e-05
	ABLIM2	-0.244428	0.000143317
	GAL3ST4	-0.244375	9.63e-06
	CD207	-0.243587	3.37e-05
	ARHGEF10	-0.243407	5.11e-08
	KRT15	-0.243347	0.00447395
	MYH3	-0.243073	4.44e-09
	D2HGDH	-0.240652	3.61e-06
	ZCWPW1	-0.240385	9.9e-07
	COX19	-0.240166	1.8e-06
	VPS37D	-0.23859	4.71e-07
	ACSF2	-0.237772	1.31e-06
	PNCK	-0.237367	1.01e-07
	SOX10	-0.237153	1.97e-05
	LOC728448	-0.237002	0.000453818
	RHOBTB3	-0.23687	8.16e-06
	CYP2W1	-0.236675	2.94e-07
	CRIP1	-0.2354	5.12e-05
	C21orf2	-0.235018	1.11e-05
	KCNJ13	-0.234973	0.000146339
	FLJ12078	-0.234908	3.99e-05
	LOC100130422	-0.234424	7.41e-06
	FLJ21986	-0.234372	2.54e-07
	LOC727908	-0.233981	5.23e-06
	GOLSYN	-0.233903	8.82e-07
	CMAH	-0.233811	0.000258106
	ARL17P1	-0.233045	0.00550945
	C9orf127	-0.232964	1.74e-08
	LONRF1	-0.232493	2.04e-05
	RNY4	-0.231245	9.77e-08
	CHP2	-0.230975	6.49e-05
	GDPD2	-0.230632	1.91e-06
	LOC653829	-0.230583	0.000231978
	FAM153B	-0.229802	1.28e-05
	MEGF6	-0.229744	3.55e-05
	HMGCS2	-0.229162	0.00266965
	LRP4	-0.228712	5.95e-05
	P4HTM	-0.228582	1.04e-05
	NPAS1	-0.228424	0.00133337
	LOC440993	-0.228345	0.00050807
	ZBTB20	-0.228065	8.44e-07
	ZBTB16	-0.227952	0.000755136
	LOC791120	-0.227919	1.21e-06
	SLN	-0.22742	0.000407006
	LOC162073	-0.226719	9.49e-07
	PLXNA3	-0.226207	2.76e-06
	LOC652726	-0.225925	3.52e-07
	LOC730525	-0.225621	7.37e-07
	CCBL1	-0.225555	8.33e-07
	ASIP	-0.225381	2e-05
	STXBP6	-0.225059	0.000297145
	TTC14	-0.224717	1.02e-06
	SYT8	-0.224668	8.12e-06
	LOC642342	-0.224548	0.0101146
	LOC728779	-0.224179	5.62e-05
	LOC648226	-0.223842	0.000741876
	DZIP1L	-0.223725	7.98e-05
	CLIP3	-0.223627	5.66e-07
	ABCA3	-0.22332	1.78e-06
	CLEC3B	-0.22295	1.67e-05
	PHYHIP	-0.222088	7.81e-07
	CXorf57	-0.222043	6.31e-07
	LOC100190986	-0.221725	0.00100006
	LOC100133950	-0.220928	0.000154161
	TLE2	-0.220409	6.34e-06
	ZNF248	-0.220356	3.82e-05
	C10orf33	-0.220133	2.16e-05
	GSTM2	-0.219907	1.73e-05
	CD248	-0.219622	7.61e-06
	LCAT	-0.219586	1.43e-06
	NPHP3	-0.219425	2.76e-06
	MST1	-0.219191	1.43e-05
	LOC100129094	-0.219093	0.000109598
	ACSS1	-0.219032	0.00016797
	LOC652541	-0.218994	2.18e-06
	SLC22A15	-0.218934	1.05e-05
	PLCL4	-0.218612	6.57e-08
	BMP2	-0.21789	1.29e-05
	DGCR5	-0.217518	7.68e-07
	LOC100132532	-0.216966	1.89e-07
	EFCAB1	-0.216716	0.000379938
	DACT2	-0.216515	8.85e-06
	GJC2	-0.216397	2.38e-06
	CABC1	-0.216066	1.96e-06
	CXCR7	-0.215951	3.49e-05
	DISP1	-0.215847	1.2e-05
	MYH14	-0.215787	6.78e-07
	SMCR5	-0.215466	7.63e-05
	NRBP2	-0.215217	1.01e-05
	USP47	-0.215124	2.7e-07
	LOC440157	-0.215059	3.66e-05
	RDH5	-0.214088	1.17e-05
	ZNF415	-0.213685	2.17e-05
	DLL1	-0.212779	4.89e-06
	LOC644642	-0.212535	1.02e-05
	ADHFE1	-0.212419	5.18e-05
	ZNF273	-0.211938	7.57e-06
	LOC100133298	-0.211491	0.000555882
	ZNF600	-0.21143	2.4e-05
	ELAVL1	-0.21142	1.46e-06
	ANKRD18A	-0.21113	5.03e-08
	ROR2	-0.210987	9.92e-07
	LOC678655	-0.210971	2.63e-06
	TGFBR3	-0.21069	9.63e-05
	TMEM116	-0.21029	3.06e-05
	ATG16L2	-0.210099	0.00012504
	ZNF418	-0.209716	1.08e-06
	PER1	-0.209616	0.0001706
	RCAN2	-0.209594	7.77e-06
	MFAP4	-0.209516	1.77e-07
	GSDMB	-0.209341	9.01e-05
	APOE	-0.209271	1.58e-05
	C9orf45	-0.209035	9.53e-07
	MBTD1	-0.208701	0.000541824
	C5orf46	-0.208585	0.0342257
	EPHB1	-0.208249	3.13e-06
	ENO2	-0.207632	1.19e-05
	SIK1	-0.206893	0.000534013
	FAM134B	-0.206844	9.64e-06
	PALM	-0.206318	1.69e-10
	ACCS	-0.206259	0.000214916
	IL2RB	-0.205929	3.75e-05
	LOC286367	-0.205798	1.22e-06
	LOC100132395	-0.205507	2.89e-05
	EFEMP2	-0.205309	1.38e-07
	UST	-0.204762	4.07e-05
	F10	-0.204757	1.62e-05
	P8	-0.204755	0.000149242
	LOC100130276	-0.204475	0.000773218
	TNNT2	-0.204263	1.84e-05
	ASB1	-0.204189	1.64e-07
	LOC647707	-0.203431	4.48e-06
	TEF	-0.203317	8.2e-06
	CADM1	-0.203277	6.33e-05
	PHYHD1	-0.203035	1.67e-07
	PPARGC1A	-0.202369	1.29e-06
	AQP9	-0.20217	0.0026164
	ZNF439	-0.20181	0.000378165
	LEAP2	-0.201755	6.19e-07
	LOC100128423	-0.201196	1.59e-05
	CRYAB	-0.20061	6.39e-07
	ZNF84	-0.20044	3.18e-07
	COL16A1	-0.200077	3.15e-07
	PIK3C2G	-0.199994	2.26e-05
	PDK4	-0.199721	7.93e-06
	PER3	-0.199559	3.05e-05
	HES4	-0.1993	2.21e-07
	GALNTL1	-0.199295	2.79e-08
	PEG3	-0.199001	6.87e-05
	CLDND2	-0.198996	1.99e-07
	PPP1R3E	-0.19882	5.34e-06
	C7orf41	-0.198557	1.52e-06
	C11orf80	-0.198522	1.75e-05
	BBS2	-0.198422	8.62e-05
	LOC399959	-0.198281	2.07e-06
	LOC653316	-0.197944	1.53e-05
	TRPC1	-0.197862	4.07e-07
	C14orf28	-0.197538	5.92e-07
	TGFBI	-0.197476	1.56e-07
	LOC283553	-0.197215	3.02e-05
	RAB33B	-0.197171	7.87e-08
	C2orf55	-0.197142	0.000139906
	WFS1	-0.197094	2.7e-08
	TMEM119	-0.196844	0.000357827
	SMA4	-0.196508	0.000393833
	FLJ38717	-0.196268	0.000256575
	LOC100133923	-0.195889	1.6e-05
	HOXC10	-0.195772	6.05e-07
	NKD2	-0.195526	2.44e-06
	LOC440348	-0.195087	2.1e-06
	FAM174B	-0.195022	1.5e-06
	ZNF841	-0.194911	5.36e-06
	AHSA2	-0.194865	6.19e-05
	ASPA	-0.194706	1.27e-07
	RNF165	-0.194432	0.0004872
	DENND4C	-0.194278	5.54e-07
	CCDC149	-0.194107	9.61e-05
	LOC643882	-0.194105	3.51e-05
	GOLGA8A	-0.1941	0.00225484
	LOC654053	-0.193704	0.000146656
	LOC644860	-0.193464	5.68e-06
	C10orf140	-0.19324	0.000273598
	CXorf45	-0.193077	5.25e-05
	RAB26	-0.193022	9.99e-06
	MFSD2	-0.192758	0.000112478
	PCOLCE2	-0.192517	3.67e-06
	SLC27A1	-0.192401	9.32e-06
	STAG3L3	-0.192381	0.000672395
	PLEKHH1	-0.192213	2.53e-05
	GPX8	-0.192205	3.91e-06
	LOC728565	-0.192175	0.000130593
	SSPO	-0.192054	7.34e-08
	COL7A1	-0.191999	3.13e-06
	TMEM191A	-0.191768	4.19e-05
	C7orf63	-0.191515	8.16e-06
	IL20RA	-0.191509	2.06e-07
	C11orf45	-0.191336	3.41e-05
	FNDC1	-0.191245	0.000142014
	ZNF91	-0.191188	1.45e-06
	CFD	-0.190286	1.63e-06
	FGF11	-0.190188	6.06e-05
	KIT	-0.189975	5.2e-05
	TNNT1	-0.189923	1.29e-05
	COBL	-0.189922	1.3e-05
	COL5A1	-0.189921	7.87e-08
	BGN	-0.18982	1.15e-07
	LOC100134144	-0.189708	4.46e-06
	SRPX	-0.189508	1.63e-06
	DACT3	-0.189307	6.99e-09
	ARMCX4	-0.189305	1.17e-06
	GALNT3	-0.189134	0.00013853
	CDH2	-0.18913	1.66e-05
	CYP4F12	-0.189078	3.55e-05
	GNRH1	-0.188955	7.77e-06
	TMEM137	-0.188928	0.00151206
	ZFP14	-0.188691	9.11e-06
	SNRNP200	-0.18856	3.39e-07
	EFEMP1	-0.188311	3.46e-07
	LOC441268	-0.188295	0.000705128
	LOC730202	-0.188255	3.27e-05
	LOC149448	-0.188243	2.37e-06
	SERPINA12	-0.188057	0.0404153
	EFNB3	-0.187485	6.12e-06
	SLC5A8	-0.187461	0.000243195
	SLITRK2	-0.187198	7.62e-06
	PRKCA	-0.18701	5.11e-08
	SLC47A1	-0.186966	7.55e-05
	SUSD2	-0.186789	0.000767784
	KIAA0367	-0.186706	4.48e-05
	ANXA8L2	-0.186702	4.78e-06
	UCHL5IP	-0.18659	1.68e-09
	ZNF256	-0.186521	1.09e-06
	LOC643453	-0.186496	0.00459558
	MAPRE3	-0.186454	9.44e-05
	C22orf32	-0.186437	3.07e-05
	LASS6	-0.186403	2.6e-06
	VSIG8	-0.18636	6.37e-05
	FLJ20920	-0.186175	2.2e-05
	LOC100128274	-0.186074	7.66e-05
	CDR2	-0.18594	3.43e-06
	GAS2L3	-0.185915	1.93e-07
	RAI14	-0.185875	7.98e-06
	FMO4	-0.185853	2.08e-05
	HSD17B13	-0.185692	1.63e-06
	FLJ21865	-0.185523	9.18e-05
	MT1G	-0.185338	0.000201422
	CLEC2B	-0.185269	0.000312098
	EIF2AK4	-0.185162	3.15e-05
	RAB3IL1	-0.185128	1.27e-07
	UBQLNL	-0.184968	2.05e-05
	LOC648921	-0.184952	0.000171979
	TARDBP	-0.184809	2.89e-06
	SNX26	-0.184749	0.000316158
	TTC18	-0.184724	9.33e-05
	LOC100132247	-0.184703	3.26e-06
	PION	-0.184629	2.48e-05
	RNY3	-0.18454	7.76e-05
	PLD6	-0.184411	5.69e-06
	SGCE	-0.183996	5.2e-06
	GOLGA9P	-0.183987	0.000261507
	C1orf175	-0.183782	3.33e-06
	AMY2B	-0.183603	6.85e-07
	ACAD11	-0.183567	0.000784834
	LOC100128460	-0.183448	0.00026468
	PCDHB19P	-0.183399	4.79e-05
	ZNF521	-0.183074	5.81e-06
	SLC27A3	-0.182651	1.77e-07
	F3	-0.182491	0.000539517
	UCN2	-0.182284	0.000105224
	MGC12760	-0.18209	0.000306747
	LOC100131989	-0.182073	0.000251799
	CYP3A5	-0.181392	0.00393592
	PDGFRA	-0.18138	4.46e-06
	C1orf21	-0.181339	2.08e-06
	PLEKHN1	-0.181207	0.000150867
	LOC653080	-0.181129	5.04e-05
	CAPZA3	-0.181034	0.000260832
	GNG7	-0.180991	5.05e-07
	2022-03-06	-0.180954	4.28e-06
	ZNF211	-0.180848	1.34e-06
	MST1R	-0.180748	5.85e-06
	C1orf203	-0.180742	0.000194132
	C5	-0.180682	7.83e-05
	TIMP3	-0.180596	0.000166785
	PDGFRL	-0.180583	0.000528752
	ANKRD36B	-0.180492	2.63e-06
	FLJ42957	-0.180392	1.07e-06
	LOC401622	-0.180135	0.000184513
	PODN	-0.18013	1.89e-05
	TRIM2	-0.180082	2.85e-07
	CBX7	-0.179948	1.12e-05
	PDE4A	-0.179892	7.57e-05
	C9orf152	-0.179875	0.000298742
	PPOX	-0.17987	0.000104728
	EMX2	-0.179774	8.66e-07
	ZBTB48	-0.179671	1.38e-05
	TRA2A	-0.179408	0.000768554
	ZNF606	-0.179377	3.35e-07
	ANKRD50	-0.179136	1.46e-05
	TRAPPC6A	-0.179056	7.65e-06
	LOC649841	-0.178973	0.0447047
	MTR	-0.178766	3.96e-07
	LOC339290	-0.178738	0.000183406
	TMEM194A	-0.17873	9.89e-06
	LOC650128	-0.17863	0.000138949
	TLN1	-0.178621	1.43e-08
	GLDN	-0.178363	0.00108168
	MXRA5	-0.178089	3e-05
	HLA-DQB2	-0.178077	2.98e-07
	LOC100131835	-0.177578	0.000425937
	RBM4B	-0.177563	4.84e-05
	LOC338758	-0.177474	6.28e-07
	C11orf67	-0.177406	3.75e-07
	BBS4	-0.177364	1.75e-05
	PPM1M	-0.177248	4.23e-07
	MDGA1	-0.176997	0.000864292
	ZNF385D	-0.176549	2.33e-05
	HSPB3	-0.1765	0.00167899
	SLC22A5	-0.176026	3.26e-05
	LOC643011	-0.176015	7.85e-06
	FLJ10986	-0.175922	1.74e-05
	GPT	-0.175706	0.00060145
	RBM12B	-0.175529	1.48e-05
	LOC646808	-0.175525	2.44e-05
	OLFML2A	-0.175288	8.33e-06
	DIS3L	-0.175251	5.55e-08
	ELANE	-0.175131	1.74e-05
	PRKCB	-0.175094	5.18e-09
	STAG3L2	-0.175014	0.00265979
	KCNMB4	-0.174944	0.00573673
	KIFC2	-0.174916	0.000260453
	ZNF860	-0.174722	0.00036998
	C10orf6	-0.174607	1.03e-05
	HNRNPU	-0.174188	1.27e-05
	RNPC3	-0.173961	5.66e-07
	MAP3K13	-0.173696	1.38e-07
	PKD1	-0.173652	5.81e-06
	NEK8	-0.173248	1.36e-05
	C2orf68	-0.173085	1.64e-06
	LOC647834	-0.173063	0.00020049
	LOC100128309	-0.172779	0.000100173
	PFAAP5	-0.172737	0.000146064
	DPYSL3	-0.17246	5.67e-05
	TLE1	-0.172319	7.68e-07
	LOC643700	-0.17228	3.33e-05
	C2orf64	-0.17223	1.08e-06
	ZNF480	-0.17222	2.29e-06
	ZNF767	-0.172115	1.46e-06
	CRYGS	-0.172002	8.05e-06
	ITPRIPL2	-0.171957	7.76e-07
	LOC286512	-0.171915	3.45e-07
	LGALS3	-0.171864	1.25e-06
	DCAKD	-0.171364	5.63e-07
	CYBRD1	-0.17123	1.57e-05
	RHOB	-0.171194	4.68e-05
	DNAH1	-0.171143	1.79e-05
	PLIN5	-0.170985	0.00318621
	REXO1	-0.170922	2.14e-06
	IPP	-0.170808	0.000380167
	ACOX2	-0.170791	5.27e-06
	LOC728678	-0.170576	0.00070753
	CUEDC1	-0.170544	5.93e-05
	PPFIBP1	-0.170479	2.57e-07
	TCF4	-0.170458	1.23e-07
	C14orf82	-0.170297	0.000551736
	CD1A	-0.170193	5.58e-08
	XPC	-0.170184	1.86e-05
	DLC1	-0.17012	5.81e-06
	MEF2D	-0.170089	2.63e-06
	HEXDC	-0.169969	0.000371095
	SP8	-0.169853	0.000107607
	LOC728715	-0.169777	0.00839017
	DCT	-0.16975	0.0013916
	USP49	-0.169602	0.000340147
	TCEAL3	-0.169495	3.01e-06
	LOC728510	-0.169402	4.35e-05
	PIK3IP1	-0.169302	5.07e-05
	MGC42367	-0.16906	0.000524961
	CEP27	-0.169025	2.04e-05
	ZNF529	-0.169003	9.43e-07
	PTPLAD2	-0.168909	2.45e-05
	TMEM106A	-0.168746	0.00227094
	CCND1	-0.168631	7.13e-08
	PI16	-0.168591	1.6e-05
	STRC	-0.168528	5.23e-06
	EPB49	-0.168499	6.35e-05
	KAT2A	-0.168489	7.18e-08
	EHD2	-0.16847	2.25e-05
	SNORD38A	-0.168441	2.52e-05
	DIP2C	-0.168193	5.71e-06
	WDSUB1	-0.168077	4.59e-05
	ZNF816A	-0.167918	7.21e-07
	THBS3	-0.167853	1.51e-05
	CA9	-0.16782	0.00220229
	ZNF33B	-0.167692	1.2e-05
	RFTN2	-0.167492	1.87e-06
	LOC100134053	-0.167236	0.0025436
	KIAA0492	-0.167129	0.00149702
	TMEM55A	-0.167119	0.000275034
	FREQ	-0.166918	1.15e-07
	LOC100130053	-0.166594	0.000245345
	LOC100131718	-0.1665	0.000359162
	LOC728105	-0.166369	0.00298679
	EXPH5	-0.166255	0.000219613
	GSTT2	-0.165802	0.00392112
	TRPV6	-0.165717	3.55e-05
	ZNF177	-0.165683	8.65e-06
	C9orf102	-0.165521	1.08e-05
	C1orf63	-0.165515	0.000173603
	LOC728310	-0.16527	3.75e-05
	SSTR2	-0.165243	0.000945636
	LOC643985	-0.16513	0.000133604
	RGMB	-0.164672	1.87e-06
	ITM2A	-0.164669	1.57e-05
	SYNJ2BP	-0.164642	2.11e-05
	CKB	-0.164509	7.77e-06
	RNY1	-0.164478	9.14e-07
	APCDD1L	-0.164337	8.16e-06
	KIFAP3	-0.16426	3.45e-05
	C8orf16	-0.164206	0.00123564
	SMO	-0.164201	2.61e-05
	LOC100131096	-0.164051	0.000184634
	LOXL4	-0.163956	4.28e-05
	LOC339766	-0.163941	0.000106924
	ZFP2	-0.163939	2.58e-06
	PHF15	-0.163938	1.27e-05
	CENTA1	-0.163932	5.86e-05
	IGF2BP2	-0.163914	0.000152313
	LOC100133930	-0.163831	0.000539429
	IRX6	-0.163819	0.000165302
	ZNF260	-0.163799	5.39e-06
	RPL10L	-0.163781	1.63e-06
	NHLH2	-0.163754	1.77e-07
	C15orf29	-0.163553	8.09e-06
	MGC72104	-0.163521	4.38e-05
	C9orf64	-0.163442	5.23e-06
	ALS2CR14	-0.16323	0.000238088
	SCARNA9	-0.162844	0.000382786
	MT1L	-0.162807	0.000214204
	DDB2	-0.162505	6.44e-05
	USP13	-0.16245	2.08e-06
	LOC153561	-0.162448	0.000901599
	FRZB	-0.161744	0.00077122
	AK2P2	-0.161333	0.00273359
	STMN3	-0.161261	6.2e-08
	LOC732134	-0.161251	0.00583142
	LOC389765	-0.16125	0.00338609
	OLFML1	-0.161056	0.000398034
	LOC730060	-0.160999	0.000551736
	IGSF9	-0.160935	8.12e-05
	MGC42630	-0.160879	3.57e-05
	LOC440341	-0.160876	4.48e-05
	MC1R	-0.160829	0.000442346
	LOC285908	-0.160681	0.00165128
	FOS	-0.160668	0.0219869
	SPG3A	-0.160636	8.2e-05
	LOC400986	-0.160553	1.07e-06
	LOC100134868	-0.160419	0.000379797
	LAMA5	-0.160392	1.08e-06
	CXCL14	-0.160346	1.2e-05
	KIAA1328	-0.160326	4.46e-06
	CPNE8	-0.160282	7.16e-06
	MUC16	-0.160215	0.0246072
	MPDZ	-0.16015	0.000200136
	NUPR1	-0.159985	0.000571381
	VCAN	-0.159964	0.000173803
	SELENBP1	-0.159913	6.34e-05
	VPS36	-0.159848	1.39e-06
	LOC727913	-0.159772	4.4e-07
	P2RX7	-0.159643	2.94e-05
	FST	-0.15959	0.00053117
	TMEM108	-0.159467	6.48e-07
	GPC1	-0.159232	1.54e-06
	PLAGL1	-0.15918	1.91e-05
	NPTX2	-0.158947	0.0297195
	LOC554203	-0.158909	0.000244244
	RAXL1	-0.158909	0.000340938
	DOCK1	-0.158726	1.08e-05
	MT1X	-0.158637	0.000861414
	LOC391169	-0.1586	8.64e-05
	LOC440585	-0.158548	0.00358332
	NISCH	-0.158532	5.71e-05
	LOC100127975	-0.158403	0.000717083
	EEF2K	-0.158331	0.000429144
	LOC285929	-0.158327	0.000122444
	NUBPL	-0.158144	0.000188359
	LOC643389	-0.157824	0.00110681
	PBX3	-0.157695	2.7e-06
	SFRS11	-0.157643	4.75e-05
	CAPN11	-0.157628	1.66e-05
	TTC17	-0.157604	4.07e-06
	LOC643466	-0.157586	4.87e-05
	ZNF140	-0.157584	4.26e-08
	FOXQ1	-0.15756	1.64e-07
	PRKCB1	-0.157545	1.23e-07
	SOX8	-0.157528	5.04e-05
	PTGIS	-0.157482	2.47e-06
	TAF4B	-0.157427	2.39e-05
	MXD4	-0.157415	9.22e-06
	ZNF526	-0.157408	3.37e-05
	DDEF2	-0.157395	1.09e-06
	LOC644250	-0.157256	2.82e-05
	LOC730273	-0.157183	7.04e-05
	CSF1R	-0.157144	4.7e-06
	DKFZp434K191	-0.156947	0.000463817
	LOC646476	-0.156788	0.000219577
	COL21A1	-0.15665	1.58e-06
	LOC100129502	-0.156349	0.001179
	PRO1853	-0.156292	0.00395564
	GAS1	-0.156254	6.26e-07
	LOC648852	-0.15625	0.00259428
	LOC100128510	-0.156248	0.000412098
	SETBP1	-0.156233	4.67e-05
	SCIN	-0.156219	2.76e-06
	LOC650346	-0.156086	3.56e-05
	LOC100129148	-0.155971	2.5e-05
	EFNB2	-0.155863	0.000106692
	LEPR	-0.155777	4.12e-05
	FAM13AOS	-0.155741	9.79e-06
	QPRT	-0.15574	1.86e-06
	AHNAK2	-0.155703	4.47e-07
	C12orf47	-0.155693	8.92e-07
	FLJ44342	-0.155686	0.00260631
	KLK1	-0.155591	0.00210071
	SCEL	-0.155561	0.00143964
	RIMBP2	-0.155435	2.5e-06
	DYNLRB2	-0.155422	0.000129884
	LOC729793	-0.15521	9.2e-05
	TRIM66	-0.155174	5.95e-05
	MAOA	-0.15514	0.00110305
	KLF9	-0.154796	0.001866
	FAM111A	-0.154557	9.79e-05
	LOC100132740	-0.154496	0.00324116
	RSPO1	-0.154413	6.53e-05
	ARL3	-0.154333	1.47e-05
	CBX6	-0.154287	3.88e-06
	HKR1	-0.154247	6.42e-06
	LOC730993	-0.15398	0.00121483
	NME3	-0.153807	2.32e-06
	SNORA59A	-0.153761	3.78e-05
	CROCC	-0.15364	0.000500259
	LMOD3	-0.153619	0.00135539
	WNT3	-0.153415	0.000228513
	WBP1	-0.15337	8.08e-06
	IL28RA	-0.153353	2.06e-07
	HDAC11	-0.153303	1.41e-05
	RAPGEFL1	-0.153226	4.14e-06
	ZNF786	-0.153113	0.000323148
	LOC613037	-0.153058	3.03e-05
	TRPC6	-0.152964	0.000224311
	SLC48A1	-0.152917	1.64e-07
	MEOX2	-0.152885	6.48e-06
	MEG3	-0.152862	3.31e-05
	C15orf5	-0.152833	9.35e-05
	ZNF75A	-0.152799	3.37e-05
	ZRANB2	-0.152663	3.4e-07
	LOC440353	-0.152629	2.33e-06
	ZNF175	-0.152609	4.47e-05
	PMS1	-0.152456	4.15e-05
	C3orf50	-0.152284	0.000155327
	TJAP1	-0.152262	1.16e-06
	XYLT2	-0.152235	1.27e-06
	C14orf80	-0.152181	0.00014596
	CD1C	-0.152166	0.00387153
	PDK1	-0.152104	3.19e-05
	MATN2	-0.152052	2.3e-05
	PTH1R	-0.151857	9.92e-07
	EFHC2	-0.151809	6.19e-05
	NYNRIN	-0.151648	2.33e-05
	OVGP1	-0.15163	0.00402678
	NFIB	-0.151603	4.33e-06
	PIP5K2B	-0.151432	0.000142385
	ADAMTSL3	-0.151307	8.05e-08
	ZNF223	-0.151302	0.000182716
	PHACS	-0.151138	0.00045477
	SCUBE2	-0.151029	0.000689016
	ZNF337	-0.151013	3.52e-07
	C9orf130	-0.150857	0.000127199
	HSPC157	-0.150794	0.0250316
	ALCAM	-0.150787	2.37e-06
	ZADH2	-0.150784	2.69e-06
	GLS	-0.150707	9.14e-07
	LIME1	-0.150643	3.01e-06
	RHOC	-0.150613	5.11e-08
	TNFRSF25	-0.150566	5.96e-06
	HOXC9	-0.150461	3.49e-05
	ZNF419	-0.150337	1.09e-06
	FLJ25363	-0.150301	0.000336393
	ISM1	-0.150017	1.29e-05
	EDN1	-0.149838	0.00645459
	FAM160A2	-0.149723	6.75e-06
	CBS	-0.149649	3.1e-05
	ARL9	-0.149543	0.00241993
	INPPL1	-0.149466	8.65e-06
	LOC643949	-0.149207	1.99e-06
	PDK2	-0.149204	3.85e-07
	LOC728178	-0.149168	0.0055143
	LOC100129211	-0.149118	0.00119522
	GCGR	-0.149014	0.0213913
	IL1F7	-0.148929	0.0170766
	SPATA20	-0.148877	1.75e-05
	LOC651309	-0.148723	0.00187847
	NPIP	-0.148685	3.3e-05
	EMX2OS	-0.148517	1.47e-06
	PANX2	-0.148174	2.37e-05
	LOC92017	-0.148155	0.00502743
	LOC202781	-0.148095	3.26e-06
	PLLP	-0.14798	0.000380663
	LOC728649	-0.147862	4.61e-06
	CDRT4	-0.147848	0.00159465
	CCDC84	-0.147711	0.000143888
	CTXN1	-0.14744	0.000772398
	ZNF433	-0.147434	1.92e-06
	C10orf104	-0.147345	3.41e-05
	TMEM194	-0.147263	8.86e-05
	LOC728653	-0.147215	0.000600597
	AACS	-0.147205	8.06e-06
	C1orf115	-0.147187	8.86e-07
	PAN2	-0.147165	5.23e-05
	BHLHB3	-0.147001	3.45e-07
	LOC100130835	-0.146928	0.00079633
	RORC	-0.146913	8.71e-09
	LOC646897	-0.14691	0.000883763
	TRIM45	-0.146832	6.26e-05
	DLG5	-0.146817	4.12e-05
	FCGBP	-0.146783	1.66e-07
	SPATA18	-0.146513	5.76e-05
	GABBR1	-0.146513	9.63e-06
	EPHX2	-0.146431	0.000659639
	ARHGEF12	-0.14634	1.46e-06
	SLITRK4	-0.14615	1.46e-05
	FAM107B	-0.146088	7.6e-05
	LOC401098	-0.146068	0.00171013
	LOC100132585	-0.146008	0.00117007
	C5orf41	-0.145968	0.000101846
	LOC388344	-0.145834	5.12e-06
	HCN3	-0.145778	0.000668784
	ARMCX2	-0.145668	0.00019899
	CPXM2	-0.145599	9.92e-05
	DDX6	-0.145376	0.000138806
	LOC729120	-0.145365	0.00179998
	KIAA1407	-0.145359	7.57e-05
	AHI1	-0.145323	0.00256771
	LOC727759	-0.145248	0.00107241
	TULP3	-0.145228	1.31e-06
	POU2F1	-0.145209	2.06e-06
	ASAP2	-0.145164	2.81e-06
	SNORD95	-0.144997	3.62e-06
	RHBDL1	-0.144896	1.36e-05
	C2orf40	-0.144831	0.000138199
	BLZF1	-0.144733	0.00058991
	ZNF773	-0.144664	4.34e-05
	NAB1	-0.144272	2.19e-05
	SNORD33	-0.144019	2.91e-05
	SLC22A17	-0.143866	7.24e-08
	TIGD7	-0.143746	0.000143808
	ATP6AP1L	-0.14373	0.00166279
	C7orf43	-0.143713	3.04e-05
	LOC401623	-0.143638	0.000784091
	BTBD15	-0.14362	4.14e-05
	CEP135	-0.143555	8.41e-06
	SH3YL1	-0.143512	3.65e-05
	MYOM1	-0.143463	0.000316092
	CCDC14	-0.143435	5.29e-05
	MAGT1	-0.14341	0.000759286
	BDP1	-0.143248	0.000345245
	NR3C2	-0.143051	3.29e-07
	CTNNBIP1	-0.143024	0.000261507
	CROP	-0.142937	2.29e-06
	DNHL1	-0.142914	9.64e-06
	SLC25A27	-0.142887	0.001165
	SNORD55	-0.142825	3.53e-06
	ATPBD1B	-0.142783	7.81e-07
	FCER1A	-0.142779	2.62e-07
	RORB	-0.142728	8.26e-08
	FGGY	-0.142693	1.22e-05
	SNX1	-0.14267	7.79e-07
	TDRD1	-0.142644	0.00154038
	VWA5A	-0.142566	8.24e-07
	SGK3	-0.142562	6.31e-07
	TRIM56	-0.142513	0.000710369
	PRPH	-0.142502	1.27e-05
	C19orf44	-0.142377	0.000320847
	NOXA1	-0.142233	0.000398034
	A4GALT	-0.142225	4.18e-05
	TMEM159	-0.14222	4.88e-08
	ANKRD37	-0.142091	0.000149466
	INTU	-0.142065	3.79e-06
	BARD1	-0.141891	0.000355834
	CTSF	-0.141845	4.23e-06
	PAQR8	-0.14171	0.00130034
	VEZF1	-0.141684	6.42e-06
	GFRA2	-0.141286	0.000183126
	RBM33	-0.141233	3.07e-05
	RICH2	-0.141177	0.00936049
	COL23A1	-0.141161	6.68e-06
	PLA2G4C	-0.141091	0.000218544
	FLJ11292	-0.140991	0.00149454
	PKIB	-0.140911	1.85e-09
	ZNF358	-0.140869	5.35e-05
	MET	-0.14071	1.29e-06
	ANG	-0.140644	8.99e-06
	CLDN1	-0.140557	1.94e-06
	OLFML3	-0.140546	0.000723293
	TRIM52	-0.140407	0.00037837
	N4BP2L1	-0.14028	1.12e-05
	C5orf53	-0.140249	0.000263171
	GATS	-0.140226	0.00403751
	RALGPS1	-0.140181	8.77e-05
	LAMB2	-0.139984	5.37e-05
	LOC100133516	-0.139903	0.0020484
	C10orf10	-0.139753	0.00678196
	LOC729843	-0.139666	3.53e-06
	KREMEN2	-0.139618	8.25e-06
	RBM6	-0.139617	3.29e-05
	MFAP5	-0.139534	0.0278195
	PGM5	-0.139421	6.33e-08
	WDR27	-0.139394	0.000311558
	ANXA11	-0.139383	6.37e-07
	ZNF329	-0.139361	4.7e-08
	POGZ	-0.139334	3.51e-06
	ZSWIM5	-0.139222	6.05e-07
	ZNF467	-0.139203	0.000212394
	CFH	-0.13913	4.67e-06
	MTE	-0.139032	0.000210085
	LOC728888	-0.138957	4.75e-06
	RUNDC2C	-0.138688	0.000214996
	LOC201229	-0.138615	1.67e-05
	C1GALT1	-0.138549	4.86e-06
	CCDC3	-0.138526	4.61e-06
	MMP28	-0.138465	7.21e-05
	LRIG3	-0.13845	0.00234881
	LOC100130353	-0.138409	0.00162786
	CEP290	-0.138179	6.33e-05
	FOXO1	-0.138117	2.06e-07
	ZFP112	-0.137976	1.84e-05
	FREM1	-0.137957	6.98e-06
	LOC647389	-0.137819	0.00299979
	DDAH1	-0.137672	0.00212161
	RAGE	-0.137604	0.000145431
	CAMTA1	-0.137546	0.000281633
	DLG2	-0.13748	0.000442363
	PVRL3	-0.137343	2.01e-06
	LOC143666	-0.137331	1.01e-05
	FUK	-0.137288	6.69e-06
	PSAPL1	-0.13722	0.0338427
	CAPRIN2	-0.137174	0.000463679
	ST6GALNAC2	-0.137051	0.000177144
	ZNF615	-0.137044	2.93e-05
	HLF	-0.137027	0.000171354
	DBP	-0.136987	0.0103254
	LAMB1	-0.136949	5.09e-05
	TMEM175	-0.13681	5.71e-06
	JAM3	-0.136649	7.44e-06
	MDC1	-0.136622	7.33e-07
	SLC6A16	-0.136532	1.44e-05
	ZNF721	-0.136529	9.92e-07
	FLJ44124	-0.136476	0.000434503
	ZNF738	-0.13645	0.000152293
	HSPC268	-0.136367	0.00209606
	MIR2116	-0.136301	0.00072362
	PLEKHA5	-0.136294	2.44e-05
	SECISBP2	-0.136249	8.92e-06
	UGT3A2	-0.136242	0.00140983
	MGC24103	-0.136186	0.0122859
	SPTAN1	-0.13611	8.15e-08
	TAPT1	-0.136077	1.83e-05
	ZFP36L1	-0.136068	3.26e-07
	CSAD	-0.136035	3.33e-05
	SLC7A6	-0.136029	6.44e-06
	ARID3B	-0.136028	1.88e-05
	POU6F1	-0.135884	4.25e-05
	MED13L	-0.135884	2.08e-05
	PDZD2	-0.13588	0.000850253
	ATXN3	-0.13582	7.55e-05
	TUBE1	-0.135803	0.000210384
	KIAA0907	-0.135725	8.21e-05
	LOC648509	-0.135696	0.000669852
	LOC100133506	-0.135668	0.0114269
	CCDC102A	-0.135665	6.1e-06
	COL6A1	-0.135637	1.53e-06
	AXL	-0.135506	1.83e-05
	BEST1	-0.135238	0.000626758
	RASSF9	-0.135129	0.0223008
	LYPD6B	-0.134896	0.000765654
	PLD1	-0.134775	2.21e-05
	LOC646093	-0.134682	1.47e-06
	KLHL24	-0.134626	8.45e-05
	BEND5	-0.134544	1.6e-05
	OSBPL8	-0.134405	1.23e-07
	C11orf61	-0.134387	3.1e-05
	TUT1	-0.134214	0.000116313
	LOC731605	-0.1342	0.00136956
	LDLRAD3	-0.134146	4.86e-05
	OTUD1	-0.134094	1.34e-05
	FAM117A	-0.134086	1.37e-06
	GARNL3	-0.134079	0.000138697
	CRIPAK	-0.133945	0.00014043
	SHROOM4	-0.133903	0.00417402
	SLAIN2	-0.133879	9.09e-05
	C15orf59	-0.133868	0.0227089
	CABLES1	-0.133812	0.000423199
	ZNF706	-0.133784	1.26e-06
	LOC100131452	-0.133776	0.00334865
	FAM175A	-0.133717	0.00111825
	DRD4	-0.133476	1.21e-05
	WASH1	-0.133476	0.000505854
	MAML3	-0.133436	0.00107537
	HSPB7	-0.13343	6.94e-06
	IL11RA	-0.13336	1.24e-05
	IRF4	-0.13336	0.00056318
	CCDC77	-0.133236	4.24e-05
	LRRC37A	-0.133236	0.00968721
	TRNP1	-0.133155	0.000693975
	CLDN5	-0.133052	0.000330538
	ZNF234	-0.133031	0.000264868
	ZKSCAN1	-0.133004	0.00130789
	ECM2	-0.132944	1.28e-05
	MFSD11	-0.132921	0.00139066
	FLJ10213	-0.13289	0.0010685
	C18orf51	-0.132788	0.00108681
	EPS15	-0.132763	2.23e-06
	CAPS	-0.132629	1.01e-06
	PPM1J	-0.132509	1.63e-06
	FGFBP2	-0.132465	0.000724114
	ZNF514	-0.13244	0.00139029
	C10orf116	-0.132385	6.33e-08
	GIN1	-0.132385	0.00394349
	CCDC144B	-0.132384	0.0129648
	LOC648059	-0.132347	0.0013726
	FAM63B	-0.132207	2.28e-07
	SPATS2	-0.132146	2.02e-05
	C19orf18	-0.132104	1.91e-06
	LOC728499	-0.131995	0.00368629
	TPM2	-0.131926	4.84e-05
	PHKA2	-0.131819	5.38e-05
	LOC729978	-0.131764	0.000411664
	LOC100132774	-0.131732	0.00654626
	ITCH	-0.131683	0.000126044
	TUFT1	-0.131624	1.86e-06
	CNNM3	-0.131549	1.89e-05
	RILPL1	-0.131528	3.31e-06
	HOXC8	-0.13143	2.44e-05
	FLJ34047	-0.13143	0.00258574
	ANKRD20A1	-0.131403	0.000111706
	LYRM7	-0.131381	5.25e-06
	SP4	-0.131256	2.16e-05
	VAPB	-0.131244	1.77e-05
	SYNC1	-0.131163	0.00137526
	FCGRT	-0.131082	3.88e-06
	CCDC85A	-0.131005	8.28e-05
	PPP1R16A	-0.13089	1.03e-06
	CCDC125	-0.130449	0.000811514
	DPT	-0.13039	0.00414184
	BAT2L	-0.130341	0.000132872
	ZNF69	-0.130281	0.000250299
	ZNF264	-0.130133	0.00010148
	JDP2	-0.130026	0.000163559
	ALDH3A2	-0.130023	0.000422025
	LOC100132439	-0.129891	0.000505031
	QSOX2	-0.129716	4.28e-05
	LOC100128288	-0.129599	0.00238112
	ZNF462	-0.129528	0.000418363
	AXIN2	-0.129515	4.86e-06
	IFFO2	-0.129509	2.77e-05
	TRAK1	-0.12947	7.65e-06
	CES8	-0.129423	0.00213729
	N4BP2	-0.129384	9.33e-05
	RTN4RL1	-0.129371	8.74e-06
	MYO9A	-0.129347	3.18e-06
	EVI5	-0.129234	6.48e-05
	LOC440389	-0.129226	0.0212361
	CCDC45	-0.12915	9.26e-06
	KLHL28	-0.129117	3.29e-05
	RAB11FIP4	-0.129106	3.02e-05
	NINJ1	-0.129015	5.69e-05
	SPSB3	-0.12898	0.000103775
	AGAP8	-0.128902	1.57e-05
	OCA2	-0.128899	0.0321682
	COL13A1	-0.128887	6.26e-06
	FLYWCH1	-0.128714	2.72e-06
	MGC52000	-0.128686	7.77e-05
	RGS2	-0.128662	0.00112066
	GGA2	-0.128611	5.31e-05
	LOC100132391	-0.128516	0.000829858
	PLEKHA6	-0.128449	5.92e-05
	GPR124	-0.128414	2.78e-05
	LOC646996	-0.128392	0.000101188
	MMP23B	-0.12836	1.1e-06
	ZBTB45	-0.128328	1.43e-08
	FAM46A	-0.1283	2.47e-06
	FLJ35390	-0.128269	0.000120818
	ANKRA2	-0.12825	2.98e-05
	LOC100130598	-0.128243	0.00451869
	ADCY6	-0.128151	8.38e-06
	HSD17B7	-0.128017	0.0008162
	ADH1B	-0.128015	4.96e-05
	MOSPD2	-0.127967	0.000647466
	TXNIP	-0.127888	1.65e-06
	NBPF8	-0.127704	4.95e-05
	CPSF1	-0.127699	3.41e-05
	HOXB5	-0.127549	0.00210895
	ZNF34	-0.127517	2.63e-05
	SIN3B	-0.127406	0.000437767
	PDGFRB	-0.12735	8.25e-06
	LOC100129550	-0.127202	0.000122614
	LOC283267	-0.127168	0.000146142
	BTAF1	-0.126933	7.56e-06
	LOC100128975	-0.126915	1.6e-05
	TNS4	-0.126819	6.45e-06
	DCUN1D4	-0.126781	2.63e-06
	ATG12	-0.12676	2.11e-06
	ABCA5	-0.126592	9.39e-07
	LOC642333	-0.126494	3.18e-06
	RYBP	-0.126358	7.59e-08
	LOC642367	-0.126253	0.000146656
	TCEA3	-0.126119	3.14e-06
	GIT1	-0.126048	3.01e-05
	CDH11	-0.126032	0.00108207
	C20orf127	-0.126032	0.00234168
	SDHAP2	-0.126005	0.000543844
	CHADL	-0.125887	2.34e-06
	LOC100133080	-0.125856	3.53e-06
	LOC727962	-0.125841	0.00192447
	ADD3	-0.125789	1.46e-06
	LOC731085	-0.125788	2.34e-06
	SNORA80	-0.125749	0.00117366
	ZNF25	-0.125692	4.29e-05
	LOC100129055	-0.125684	0.000182666
	ABCA10	-0.125589	5.53e-05
	DIO3OS	-0.125526	0.000115748
	ZNF616	-0.125511	0.000110185
	TCEAL2	-0.125473	0.000987419
	DDX17	-0.125457	3.93e-06
	CTGLF3	-0.125374	1.12e-05
	LSAMP	-0.125294	0.000176933
	STAT5B	-0.125177	1.11e-05
	NDE1	-0.125174	3.08e-06
	C20orf72	-0.125026	0.000314987
	CCDC93	-0.124946	4.5e-06
	C2orf69	-0.12494	0.000713814
	CASC1	-0.124841	0.000516459
	SLC38A4	-0.124746	0.000366864
	NFIX	-0.124692	2.14e-05
	HOXC4	-0.124622	8.46e-06
	LOC100129905	-0.124553	0.0205596
	USP33	-0.124515	8.41e-06
	INHBB	-0.124506	0.0031518
	SLC38A2	-0.124498	2.51e-07
	SIX5	-0.124491	5.76e-05
	FAM98C	-0.124289	8.65e-06
	C12orf51	-0.124244	0.000238088
	IRF5	-0.124192	0.00436662
	LOC729348	-0.12413	0.00226213
	PGAP1	-0.124071	0.00372786
	TMEM91	-0.124066	0.00163752
	HSPA1A	-0.124035	4.14e-05
	CCDC146	-0.123995	0.0139819
	FLJ42627	-0.123949	0.000542248
	SERPINB2	-0.123941	0.0227281
	LEP	-0.12386	0.000152293
	ZCCHC11	-0.123858	8.39e-06
	RAB13	-0.123854	4.93e-06
	ABCC3	-0.123755	2.8e-06
	ZNF653	-0.123713	7.94e-05
	CTDSPL	-0.123705	1.89e-06
	CRYZL1	-0.123668	4.63e-06
	LOC728205	-0.123663	0.00514632
	HIT-40	-0.123652	1.02e-05
	C1orf68	-0.123399	0.0175674
	PLAC2	-0.123359	0.000323148
	TDRD6	-0.123166	0.000376596
	LRRC37B2	-0.123072	0.00152443
	OPTN	-0.123045	6.94e-05
	C2orf42	-0.122987	7.52e-05
	UBN2	-0.122933	0.000112366
	ZNF533	-0.122895	0.00359629
	COX7A1	-0.122694	0.000546087
	HOOK2	-0.12263	0.000164409
	ZNF320	-0.122564	1.08e-06
	LOC100130367	-0.122513	0.0043139
	HTT	-0.122394	0.000578862
	IFT74	-0.122355	4.29e-06
	MTF2	-0.122284	6.9e-07
	HOXA6	-0.122201	0.000908825
	KCTD15	-0.122089	1.46e-05
	CNGA1	-0.121786	0.000704645
	NUAK1	-0.121774	0.00244035
	GHRL	-0.121592	9.71e-07
	PTRF	-0.121369	6.97e-07
	ZBTB3	-0.121343	0.00028948
	EPB41L4B	-0.121296	5.07e-06
	SGSM1	-0.121223	3.73e-05
	LOC729806	-0.121122	0.0103282
	ZNF148	-0.121114	7.37e-07
	U2AF1L2	-0.12103	7.78e-05
	LOC729209	-0.120949	1.46e-05
	LOC100133129	-0.12085	0.00268265
	LOC651017	-0.12085	0.000808338
	SMAD5	-0.120796	1.17e-06
	COL4A5	-0.120558	0.000149242
	LIMCH1	-0.120553	0.000611115
	ZNF10	-0.12055	0.000646448
	NUCKS1	-0.120435	8.52e-06
	ETAA1	-0.120385	7.04e-05
	TP53I13	-0.120372	1.47e-06
	METTL3	-0.120338	7.83e-05
	PTAR1	-0.120299	1.21e-05
	KIAA0240	-0.120182	1.01e-06
	IRX2	-0.120176	0.000144161
	LOC100132727	-0.120132	8.24e-05
	TRIT1	-0.120119	9.52e-06
	HSPBAP1	-0.1201	0.00405512
	ODZ4	-0.120097	8.18e-05
	LOC731789	-0.119939	0.000290282
	LOC729513	-0.119927	5.43e-06
	LFNG	-0.119821	1.78e-06
	COL8A2	-0.119596	1.32e-07
	MBD4	-0.119591	0.00199321
	LAMC2	-0.119516	0.00297842
	KIAA0831	-0.119479	6.57e-05
	CEP57	-0.119476	0.000192254
	FLJ25996	-0.119431	0.000165944
	C20orf94	-0.119308	0.00518235
	RNF213	-0.119247	7.75e-05
	LOC728153	-0.119236	7.99e-05
	LOC646527	-0.119074	4.48e-06
	ULK2	-0.119073	6.51e-05
	MTMR15	-0.119072	9.58e-05
	CARS2	-0.119038	4.04e-06
	NFYB	-0.119025	7.91e-05
	WDR42A	-0.118952	8.16e-06
	C21orf34	-0.118914	4.93e-05
	SLC16A5	-0.118851	4.42e-05
	KIAA0408	-0.118823	0.0203309
	KLHL29	-0.118781	0.000152123
	OXR1	-0.118774	4.66e-07
	PTGR2	-0.118724	0.00117841
	NRG4	-0.118715	0.000758002
	LSM14B	-0.118667	2.68e-06
	JARID1A	-0.11855	1.21e-06
	NUDT11	-0.118549	3.11e-05
	ETV5	-0.118397	0.000110443
	SLC2A4RG	-0.118323	9.5e-05
	NPHP4	-0.118314	0.00119221
	TFAP2B	-0.118256	2.75e-06
	STK32B	-0.118253	0.000587479
	C9orf37	-0.118249	0.000201522
	ZNF608	-0.118243	1.42e-06
	ZNF669	-0.118235	0.000162224
	FERMT2	-0.118221	1.26e-05
	SNORD97	-0.1182	0.00366458
	NPEPL1	-0.118092	0.000189562
	FRMD3	-0.118088	6.45e-05
	GPR89B	-0.118069	8.15e-05
	LOC339352	-0.118067	0.0011232
	NOL12	-0.11805	0.00158405
	DUSP1	-0.11797	0.017884
	RXRA	-0.117963	4.14e-05
	BACE2	-0.117936	0.000366837
	LOC646916	-0.117929	0.00329532
	FAM104B	-0.117858	1.85e-05
	SFRS7	-0.117856	0.000961716
	SPG20	-0.117854	4.78e-06
	MT1H	-0.117844	0.00227662
	MEIS1	-0.117827	0.000292271
	CAPN12	-0.117666	0.00256923
	PPP1R3C	-0.117616	0.0297736
	VPS13C	-0.117614	1.39e-06
	LOC100133277	-0.117557	0.0093977
	TACC1	-0.117528	1.94e-06
	METTL2B	-0.117492	5.66e-05
	ITPR2	-0.117426	0.00644818
	ZFHX3	-0.117378	0.000171122
	NKTR	-0.117176	0.000525724
	HEYL	-0.11716	0.0048689
	LOC645452	-0.117106	0.00141155
	VIPR1	-0.117031	0.00159708
	PHF17	-0.116913	1.09e-08
	LOC442075	-0.116885	0.00336343
	LIN52	-0.11685	0.00595741
	TUBB2B	-0.116838	0.0219869
	KIAA1333	-0.116822	0.000135021
	MYADM	-0.116815	0.000970312
	ZNF493	-0.116781	1.66e-05
	LOC390876	-0.116753	1.57e-06
	CCL14	-0.116734	0.011822
	SDC2	-0.116595	8.75e-05
	PCDHB9	-0.116572	0.000176905
	ING4	-0.116568	2.59e-06
	SEC62	-0.116399	3.28e-05
	LOC442727	-0.116377	6.34e-06
	C3orf15	-0.116335	1.04e-05
	NR1H3	-0.11625	1.26e-05
	IFT57	-0.116218	4.59e-05
	LOC650737	-0.116208	1.38e-05
	R3HDM2	-0.116178	1.98e-05
	SETD6	-0.116169	5.21e-05
	DUSP19	-0.11613	0.00169133
	FAM193A	-0.116016	6.1e-06
	FAM156B	-0.115906	7.03e-05
	ZNF362	-0.115898	9.39e-05
	TMEM42	-0.115892	0.000116249
	C11orf68	-0.115854	3.79e-05
	PREPL	-0.115834	1.97e-05
	SH3RF1	-0.115824	1.76e-06
	GAN	-0.115776	0.0197679
	NOL10	-0.115766	0.000265795
	C11orf41	-0.115708	3.69e-05
	FLJ10088	-0.115672	3.56e-05
	LAMB2L	-0.115628	0.000830956
	ATP13A5	-0.115552	0.000521292
	SLC25A38	-0.115534	0.000817282
	LOC729222	-0.115476	1.25e-06
	MAN1B1	-0.115456	1.91e-06
	LOC92249	-0.115372	6.11e-06
	FLJ39639	-0.115345	0.00512421
	EFHC1	-0.115283	0.013458
	VENTX	-0.11527	0.000423018
	ZSWIM7	-0.115217	0.0284286
	ZNF641	-0.115209	0.00119257
	MAF	-0.115107	0.000731456
	SPON1	-0.115098	0.00098175
	LPP	-0.115085	3.81e-05
	SNCA	-0.115075	6.23e-05
	LOC642678	-0.11501	8.91e-05
	LOC648749	-0.114917	0.00169931
	SETDB2	-0.114859	0.000574278
	LOC641848	-0.114689	8.84e-06
	RAX2	-0.114668	0.0037456
	LOC100128729	-0.114638	0.000408473
	RCOR3	-0.114596	0.000598456
	PCYOX1L	-0.114556	0.000498145
	ZNF609	-0.114485	0.000246996
	MCF2L	-0.114483	2.91e-05
	GPD1L	-0.114459	0.000101188
	RFESD	-0.114413	2.06e-06
	DGKQ	-0.114388	2.07e-05
	PPAP2B	-0.11435	0.00185427
	KCNS1	-0.114309	0.00396719
	C2orf67	-0.114287	5.66e-07
	C15orf39	-0.11428	1.03e-05
	ZDHHC11	-0.114221	0.00098175
	LOC113230	-0.11411	6.68e-05
	TMEM50B	-0.114028	7.76e-05
	PLEKHH2	-0.113996	0.00884472
	HSPA2	-0.113909	0.0208067
	SOX6	-0.11387	1.63e-06
	FGFRL1	-0.11383	1.9e-05
	CYP4V2	-0.113779	0.0448133
	SNORA12	-0.113755	0.000243967
	ORAOV1	-0.113707	0.000129889
	CIC	-0.113697	5.49e-06
	RNASEH2B	-0.11353	0.000146142
	LPAR1	-0.113511	4.4e-06
	ZNF160	-0.113312	9.7e-06
	TMEM178	-0.113271	6.28e-07
	C7orf38	-0.11327	0.00335885
	POMGNT1	-0.113211	2.72e-06
	LOC100128062	-0.113112	0.000145508
	ALPP	-0.113043	0.00332998
	ZNF12	-0.113022	2.84e-06
	ZNF845	-0.112979	1.23e-05
	GPM6B	-0.112963	0.00759481
	ZNF85	-0.112921	0.000920688
	ZMYM1	-0.112882	3.77e-05
	LOC100130764	-0.112859	0.00113276
	LOC100134159	-0.112813	0.000324488
	FBLN1	-0.11258	4.76e-06
	C1orf66	-0.112456	0.000264868
	RMRP	-0.112389	4.7e-05
	CREBL2	-0.112343	6.31e-06
	ANKRD35	-0.112339	0.000429152
	SLCO2A1	-0.112286	0.0010785
	SMAD3	-0.112257	0.00029048
	ZBTB40	-0.112221	0.000626784
	HNRNPH3	-0.112185	2.11e-05
	SF3B3	-0.112116	6.68e-06
	LOC441550	-0.112081	0.00102203
	LOC728953	-0.111996	3.26e-06
	PLXNB1	-0.111974	0.000171622
	LOC644937	-0.111965	4.68e-06
	CBLN3	-0.111924	0.0320193
	RAB14	-0.111819	0.001179
	SLCO3A1	-0.111717	9.67e-06
	HIRIP3	-0.111662	1.37e-06
	ZNF680	-0.111598	2.59e-05
	LOC100128888	-0.111593	0.00125361
	PHF21A	-0.111508	1.8e-05
	KIAA1731	-0.111467	3.4e-05
	JAZF1	-0.111296	0.000183126
	KIAA1324L	-0.111209	0.0207945
	LOC649917	-0.111208	0.0329821
	LOC100131787	-0.111195	4.22e-06
	QRFPR	-0.111185	0.00265469
	LOC196752	-0.111175	0.0123553
	ZNF585A	-0.111077	2.5e-06
	C6orf170	-0.110998	0.000222779
	PLA2G2D	-0.110975	0.000661156
	LOC654350	-0.110931	2.33e-05
	CHD6	-0.110905	1.74e-05
	DMAP1	-0.110841	8.38e-06
	ASCL2	-0.110829	2.32e-06
	NCRNA00173	-0.110819	2.85e-06
	RBM5	-0.110811	0.00022851
	PDCD4	-0.110706	0.00037488
	BCAN	-0.110687	0.0118058
	C7orf46	-0.110685	0.00521902
	HIATL2	-0.110653	0.00336855
	FOXO4	-0.110628	0.00395408
	LOC100131767	-0.110616	0.00037717
	IMMP2L	-0.110612	0.00197544
	MAN1C1	-0.110602	5.66e-07
	NCRNA00092	-0.11055	0.000370479
	FAM164A	-0.110491	0.000101661
	KIAA0528	-0.110483	1.03e-05
	GUSBL1	-0.110381	0.000502242
	ANKRD30B	-0.11032	0.000400945
	SAP18	-0.110242	1.04e-05
	LOC728809	-0.110235	0.00276065
	MGEA5	-0.110223	9.39e-06
	ZHX2	-0.110205	0.000287322
	FJX1	-0.110178	0.00328248
	MYO18A	-0.110177	2.5e-06
	KLF11	-0.110143	3.21e-05
	MTMR11	-0.110127	0.000150483
	FBLN5	-0.110121	7.73e-05
	C16orf48	-0.1101	0.000282826
	PKD2	-0.110097	1.33e-05
	ALKBH8	-0.110036	8.24e-05
	MUC15	-0.109912	0.00342359
	PTPRU	-0.109875	4.27e-07
	TMEM16A	-0.109828	0.000492017
	ZNF827	-0.109758	0.00262831
	USPL1	-0.109553	0.000500879
	ZNF564	-0.109548	1.92e-06
	ABHD6	-0.109546	0.000519427
	PRKD1	-0.109495	0.000605699
	DMTF1	-0.109322	3.94e-05
	RNF43	-0.109311	1.47e-05
	ZMIZ2	-0.109199	6.07e-06
	DST	-0.109175	1.31e-05
	LOC91661	-0.109149	3.43e-05
	MSTO1	-0.109138	6.2e-05
	XAGE1A	-0.109099	0.0119522
	CRBN	-0.109096	1.46e-05
	LOC650580	-0.109089	0.000356692
	ZDHHC17	-0.109069	9.55e-05
	SIRT1	-0.108989	1.63e-05
	LOC100129441	-0.108902	0.0269406
	ZCCHC14	-0.108901	4.4e-06
	KCTD7	-0.10882	0.00306805
	RCN3	-0.10875	7.17e-05
	PLXNA1	-0.108748	1.54e-05
	SLC1A4	-0.108679	0.00328248
	FAT2	-0.108624	2.06e-06
	LEPREL1	-0.108599	0.00117215
	SESN1	-0.108486	0.000657153
	TESK2	-0.108447	0.00138698
	NCRNA00153	-0.108416	6.64e-06
	C11orf46	-0.108387	4.55e-06
	C5orf54	-0.108369	0.00931511
	PHF3	-0.10836	3.92e-06
	ZNF512B	-0.108332	0.000120076
	CECR4	-0.108322	6.88e-06
	NMT2	-0.108272	1.21e-06
	LOC100170939	-0.108251	0.00952361
	PRKAB2	-0.108243	0.00021095
	SELM	-0.108205	0.000319309
	PABPC1L	-0.108175	0.00412513
	C17orf100	-0.108166	0.000437471
	BAZ2B	-0.108136	1.83e-05
	TACC2	-0.108061	7.58e-05
	KIAA0672	-0.107905	0.0135503
	TSC22D1	-0.107901	5.09e-05
	RAD54L2	-0.107879	0.000875535
	C7orf27	-0.107832	4.76e-06
	DENND2A	-0.107815	0.00033827
	RTN4R	-0.107793	8.07e-06
	FAM183A	-0.10779	0.00139066
	LOC401321	-0.107784	9.97e-05
	GHR	-0.107769	0.00633835
	RAB11FIP3	-0.107696	4.3e-05
	ATXN2	-0.107675	3.42e-06
	MKLN1	-0.10766	7.83e-06
	TRAM2	-0.10763	0.000802156
	IL17D	-0.107629	0.00494157
	LOC100132347	-0.1076	0.000598876
	ZNF137	-0.107507	1.85e-05
	TMEM156	-0.10746	4.61e-05
	MIA	-0.107402	0.000187387
	LOC643007	-0.10733	7.32e-06
	MCOLN3	-0.107294	0.00526653
	ZNF583	-0.107179	0.0018856
	LOC729602	-0.10717	0.0167363
	KIAA0895	-0.106941	0.00378338
	MRPS25	-0.106872	0.00628461
	ZBTB4	-0.106782	1.37e-06
	DSG2	-0.10673	3.51e-06
	LOC730313	-0.106663	0.00170273
	EFNA1	-0.106455	1.46e-06
	COCH	-0.106397	5.16e-07
	TRAK2	-0.10638	0.00231145
	N6AMT1	-0.106339	0.000258934
	ABCA11	-0.106269	7.81e-05
	LOC730990	-0.106259	0.000169685
	TLL1	-0.106242	0.000235135
	CBX5	-0.106222	1.08e-06
	ZNF557	-0.106181	7.04e-05
	TSPAN9	-0.10615	2.78e-05
	ECHDC3	-0.106148	8.06e-05
	LOC100130557	-0.106141	0.000381234
	LOC285095	-0.106128	0.000589572
	TMEM158	-0.106061	0.0075044
	LOC100133772	-0.106053	0.00155344
	C10orf105	-0.106002	2.76e-06
	MAST1	-0.105952	0.000182523
	LOC100132324	-0.105942	1.63e-05
	RALGAPA1	-0.105855	1.63e-05
	ZBTB8A	-0.105845	0.000362511
	LOC100129645	-0.105615	2.66e-05
	REST	-0.105612	0.00177145
	C14orf93	-0.105602	0.000455556
	C9orf95	-0.105577	0.000441406
	GDI1	-0.105486	0.000105309
	GRTP1	-0.105475	9.5e-05
	CPS1	-0.105357	0.020253
	OSR2	-0.105345	1.56e-07
	ZNF224	-0.105221	0.00715424
	ACAD10	-0.10519	0.00246201
	SLC25A29	-0.10519	0.0313043
	FAM39E	-0.105117	0.000200708
	ZNF502	-0.105091	8.59e-05
	KRCC1	-0.105054	1.15e-05
	LOC100131786	-0.105036	0.0112439
	LOC728457	-0.105024	0.00231503
	LOC644284	-0.105015	0.003067
	AMY2A	-0.104991	1.21e-06
	CHST14	-0.104948	0.000163795
	LOC100129952	-0.104933	6.36e-05
	RAPGEF3	-0.104928	0.000679602
	KDSR	-0.104893	0.000152402
	HCFC1R1	-0.104889	7.39e-06
	MAT1A	-0.104889	0.000910091
	PKN2	-0.104867	0.000294277
	UNC84A	-0.104842	0.000631551
	MLLT6	-0.104834	0.000102292
	SRGAP2L	-0.104829	0.00111474
	LOC654260	-0.104828	9.62e-05
	MT1E	-0.104815	0.000392833
	NAP1L3	-0.104767	0.000667455
	RNU4-2	-0.104593	1.19e-05
	BMS1P5	-0.104535	0.00510894
	MAGEE1	-0.104511	1.6e-06
	FAM39DP	-0.104449	4.75e-05
	SEMA4C	-0.104433	0.0015402
	TCTN1	-0.104258	0.000159491
	MAN2A2	-0.104245	0.00114197
	FLJ33630	-0.104205	0.000122047
	SPIN1	-0.10417	3.32e-06
	KLF5	-0.104169	0.00060272
	FAM62B	-0.104159	3.86e-05
	TMEM2	-0.10414	0.00332037
	MYST1	-0.104126	5.37e-05
	ZNF274	-0.104117	7.18e-08
	RABGAP1	-0.10411	1.46e-06
	ABHD10	-0.104087	1.07e-05
	OR2A9P	-0.104079	0.000188515
	NDST2	-0.104038	2.1e-05
	H3F3B	-0.104016	0.000376839
	VAMP2	-0.103969	0.000127293
	CARD9	-0.103939	0.00835012
	MACF1	-0.103935	0.000307834
	FAM131A	-0.103911	0.000302393
	FAM113A	-0.103907	0.0014531
	LOC727877	-0.103852	0.0103277
	CHSY1	-0.103832	1.77e-05
	GALIG	-0.103782	0.000193903
	LRP5	-0.103778	4.61e-06
	KIAA1543	-0.103736	3.39e-05
	SSBP2	-0.103676	0.000112183
	C14orf85	-0.103626	0.0019795
	EPM2AIP1	-0.103541	7.4e-07
	OMA1	-0.103499	4.18e-05
	KIAA0495	-0.103494	2.79e-05
	CCRK	-0.103437	0.00109959
	LOC649181	-0.103414	0.018527
	MUM1	-0.103389	0.000921114
	SLC25A42	-0.103355	8.71e-05
	C10orf115	-0.103319	0.000171922
	LOC648526	-0.103298	0.0298369
	LOC286002	-0.103208	0.00120283
	FAM133B	-0.103183	1.6e-06
	ATG5	-0.103136	7.55e-05
	HNMT	-0.103121	3.92e-07
	RASSF6	-0.103107	2.11e-05
	LOC158301	-0.103093	0.0004872
	FAM179B	-0.103072	0.000137486
	AQP7P1	-0.103046	0.00145308
	PRKAA1	-0.103002	3.16e-06
	RAB11FIP2	-0.102929	3.91e-06
	LINGO2	-0.102927	0.00274277
	SORBS1	-0.102927	8.78e-08
	WDR19	-0.102819	0.00228915
	KLHL9	-0.102803	0.000500354
	LINGO4	-0.102783	0.000378165
	SPTBN1	-0.102696	1.02e-07
	LOC440928	-0.102694	0.039519
	LOC100130604	-0.102662	0.00401658
	SLC23A3	-0.102652	0.0273284
	RIC3	-0.102633	0.00012952
	ANGEL2	-0.102517	0.000131534
	RBM20	-0.102501	0.0318231
	RNPEPL1	-0.102472	0.00062969
	C22orf29	-0.102455	0.00209368
	TMEM43	-0.102443	6.61e-05
	USP24	-0.1024	4.68e-05
	TNFRSF14	-0.102388	0.00102011
	GDPD1	-0.102371	0.00139029
	NEURL1B	-0.10235	0.000168662
	HSPB2	-0.102284	0.000200708
	C10orf39	-0.10226	0.0072863
	ARHGEF4	-0.10219	7.21e-05
	C19orf25	-0.102022	0.000728501
	AUTS2	-0.101974	2.21e-05
	LOC100128084	-0.101959	0.00202935
	C20orf196	-0.101934	0.000231978
	LOC644391	-0.101894	0.000429428
	RTDR1	-0.101819	0.00021095
	RRM2B	-0.101819	8.2e-06
	ELF2	-0.101813	2.24e-05
	KIAA0460	-0.101755	0.000132511
	TBC1D8	-0.101741	0.00396942
	LOC100129975	-0.101707	0.000167504
	RPL31P10	-0.101676	1.53e-05
	URB1	-0.101638	4.59e-05
	ZC3H10	-0.101636	0.000767647
	LOC220433	-0.101594	1.23e-05
	TNPO2	-0.101593	2.63e-05
	SERP2	-0.101523	0.000193242
	MIR205	-0.101518	0.00596012
	DNAJC30	-0.101434	9.97e-05
	INTS3	-0.101425	9.9e-05
	FLJ37396	-0.101406	0.00265098
	MFGE8	-0.101378	2.18e-05
	LRCH4	-0.101345	0.00481205
	SP1	-0.101201	1.93e-06
	KRTCAP3	-0.101164	0.000329173
	PIGX	-0.101157	0.00423028
	RERGL	-0.101092	0.000937131
	AHCYL2	-0.100993	0.000564263
	RPAP2	-0.100979	0.000201522
	ELL3	-0.100958	0.00573224
	ZNF446	-0.100946	4.53e-05
	NCOR2	-0.100921	4.09e-05
	CHGA	-0.100909	0.00279089
	P4HA1	-0.100859	2.5e-06
	FLJ31306	-0.100835	7.93e-06
	TCEA1	-0.100829	0.000160769
	PMS2L3	-0.100817	8.29e-05
	SDC4	-0.100795	0.00227681
	CES1	-0.100789	2.33e-05
	ANKRD44	-0.100762	0.000356882
	FAAH	-0.10073	0.00154437
	OFD1	-0.100717	0.000620153
	NSUN5	-0.100603	6.56e-06
	SNORD89	-0.10055	0.00151897
	LOC729760	-0.100526	6.55e-05
	C7orf59	-0.100512	0.002186
	NEURL4	-0.100481	0.000867564
	GSTA3	-0.10046	0.0439008
	IL20RB	-0.10022	0.000782015
	LEPRE1	-0.10022	2.89e-06
	ARL6IP5	-0.100081	2.19e-05
	ALG11	-0.100001	0.0139571
	FLJ90086	-0.1	0.0185666
	FAM40B	-0.0999225	0.00073188
	L2HGDH	-0.0998999	0.00138205
	C10orf67	-0.0998157	0.000247498
	GAS6	-0.0997927	3.29e-06
	NUDT7	-0.0997467	0.000117151
	ENHO	-0.0997066	1.18e-05
	ATP8B4	-0.0997021	0.00159075
	FLJ40473	-0.0995795	1.37e-06
	LOC729799	-0.0995637	0.000103093
	FEM1C	-0.0995465	8.17e-05
	TACSTD1	-0.0995372	0.000316518
	PLOD1	-0.0995172	5.01e-05
	TOB1	-0.099479	2.59e-07
	HOXA5	-0.0994606	0.00735277
	LEMD2	-0.0994577	1.09e-05
	SENP7	-0.099427	0.000242349
	GLCE	-0.0994245	1.6e-05
	C12orf65	-0.0994179	0.000367871
	ZNF14	-0.0994111	0.000172677
	CAPN3	-0.0993615	0.000603606
	ACVR2A	-0.0993482	0.000143995
	SYDE2	-0.0993283	5.41e-05
	LOC653110	-0.0992519	1.26e-05
	LOC645236	-0.0992147	0.003916
	ZNF766	-0.0991963	4.74e-05
	LOC100130168	-0.0991535	0.00122417
	C7orf54	-0.0990918	0.0440757
	LOC643854	-0.0990792	0.00110502
	MBD6	-0.0990615	0.00145953
	TERF1	-0.0990456	5.02e-06
	ZC3H5	-0.0989995	1.21e-05
	LOC100132535	-0.0989892	6.76e-05
	DNAJA4	-0.0989402	1.93e-05
	BCHE	-0.0989089	0.0163051
	SLITRK6	-0.0989079	0.00281975
	AASDH	-0.0989037	0.000174462
	FBXW7	-0.0988416	4.61e-06
	THOC2	-0.0985725	1.9e-05
	C10orf73	-0.0985315	1.74e-05
	NSUN5B	-0.0984528	0.00114209
	HDAC5	-0.098405	5.05e-06
	C9orf123	-0.0983992	3.44e-05
	RIN1	-0.0983831	0.00025327
	C12orf23	-0.0983133	0.000148209
	LOC100132323	-0.0982637	0.00149084
	DCLK1	-0.0982537	0.00179208
	RGS11	-0.09821	4.3e-05
	SALL2	-0.0981751	0.000139489
	GPC3	-0.0981724	2.87e-05
	NFE2L1	-0.0980697	8.7e-06
	ZNF783	-0.0980685	0.000313653
	ZNF777	-0.0980676	3.95e-05
	ZKSCAN3	-0.0980344	0.000836085
	KHNYN	-0.0979777	0.00274123
	LRAP	-0.0979661	0.00148977
	TWIST1	-0.0978933	0.00210142
	C2orf63	-0.0978492	0.0035668
	PRMT2	-0.0977759	4.18e-05
	SPRY1	-0.0977103	2.91e-05
	CETN3	-0.0976768	1.38e-06
	USP11	-0.0976729	2.91e-05
	SF3A2	-0.097641	2.18e-06
	TMSL3	-0.0976032	1.33e-06
	C7orf47	-0.0975875	2.78e-05
	FOXJ3	-0.0975402	3.45e-06
	TNFSF15	-0.0975314	0.00151278
	FLJ11783	-0.0974805	0.00248293
	LOC388076	-0.0974663	5.68e-06
	PJA2	-0.097252	0.000129784
	LOC730176	-0.0972458	7.81e-05
	KLHL22	-0.0972444	0.00185854
	ZNF789	-0.097216	0.000185745
	RBM25	-0.0971572	8.96e-06
	LRDD	-0.0970961	0.000304606
	RSBN1L	-0.0970281	9.77e-05
	LOC100128098	-0.0970141	0.00195511
	IRX5	-0.0970093	0.00012369
	BCL9	-0.097001	1.5e-06
	C10orf51	-0.096909	0.00737634
	LOC440345	-0.0968596	0.00272729
	EPN2	-0.0968567	3.91e-06
	MAP3K1	-0.0968338	2.06e-06
	CP110	-0.0967721	1.88e-05
	HNRPH3	-0.096771	2.66e-05
	HES5	-0.0967153	0.0408594
	PAM	-0.0966462	8.2e-06
	WNT2B	-0.0966458	0.00116702
	SRGAP1	-0.0966308	0.00884721
	ZNF577	-0.0966297	0.00230211
	PLP1	-0.0966254	0.000652498
	ANKRD38	-0.0965305	5.69e-06
	LOC654342	-0.0965085	0.0334561
	TRPM4	-0.0964374	2.19e-05
	C11orf2	-0.0964228	9.76e-06
	LOC100132896	-0.0964213	0.00743502
	KIAA2026	-0.0963224	0.000176021
	COLEC12	-0.0962965	0.000193903
	ARL4A	-0.0962907	0.000455556
	LOC399900	-0.0962347	0.00152407
	EIF4A2	-0.0962276	2.91e-05
	ZNF532	-0.0961707	0.000149242
	SNORD87	-0.0961305	0.000145057
	SFRS18	-0.0960853	6.36e-05
	CAMKV	-0.0960727	0.000175793
	ABCA6	-0.096048	0.00830921
	LOC389286	-0.0960341	0.00119132
	PLOD3	-0.0959887	7.64e-05
	CAPN5	-0.0959752	0.00339096
	LOC100133840	-0.0959548	0.0381101
	PCDH17	-0.0959433	0.026222
	CHD9	-0.0959241	7.07e-05
	PIB5PA	-0.0958771	0.000637302
	RANGRF	-0.0958255	0.00138522
	FLJ20021	-0.0958205	0.000830956
	LOC132241	-0.0957984	0.015598
	SNAPC4	-0.0957196	2.56e-05
	GNA11	-0.0957023	0.000101802
	CUL9	-0.0956717	0.00334244
	SRRM2	-0.0956533	8.07e-06
	FAM73A	-0.0956253	0.000911624
	NOTCH1	-0.0956028	0.000448228
	FLJ40722	-0.0955913	0.0014276
	ARID4A	-0.0955425	4.8e-06
	SACM1L	-0.0955258	2.51e-05
	LIN7B	-0.0955113	0.0147716
	CCDC130	-0.0955107	0.000174688
	FOXJ2	-0.0954559	8.66e-06
	TSNARE1	-0.0953774	0.0229008
	NOTCH4	-0.0953498	0.0296015
	ZNF395	-0.095341	0.0025938
	IRS2	-0.0953217	0.00723006
	HTR2A	-0.0953201	0.000111737
	LLPH	-0.0952837	8.07e-06
	SFRS16	-0.0952652	0.0103174
	LOC100133939	-0.0952594	3.99e-05
	ANKIB1	-0.0951316	5.2e-05
	CLCA4	-0.0950338	0.0269568
	LOC644033	-0.0950305	0.000398034
	IPW	-0.0950262	0.000421272
	ANAPC4	-0.0950159	4.12e-05
	MZF1	-0.0949997	5.21e-05
	GSPT2	-0.0949809	3.38e-05
	GOLGA8B	-0.0949292	0.000599912
	DDX59	-0.0949006	2.82e-05
	SGCG	-0.0947793	0.000169635
	MLL4	-0.0947654	0.00238899
	ZNF324	-0.0947638	0.000243967
	DHFRL1	-0.0947421	1.1e-05
	LOC123688	-0.0946753	0.00380946
	TLE4	-0.0946573	0.000755761
	CSDE1	-0.0945252	4.33e-06
	SLC46A3	-0.0945181	0.0114057
	AP3M2	-0.0944993	0.00031216
	FAM149B1	-0.0943745	0.000116552
	CYB5R1	-0.0943563	5.23e-07
	LOC644931	-0.0943493	0.0014131
	NEDD4L	-0.0943077	0.000204076
	PCDHB2	-0.094298	0.0184368
	GATM	-0.0942422	0.00303491
	ZNF187	-0.0942354	5.46e-05
	HIST1H1A	-0.0942242	0.000567906
	GABRE	-0.0942147	0.00236146
	SCARNA21	-0.0941527	0.00350432
	EPHB6	-0.0941452	0.00873885
	RPL23AP13	-0.0941432	3.88e-05
	FLJ27365	-0.0941373	0.00110713
	TM7SF3	-0.0941218	0.000185942
	LOC441087	-0.0941003	0.00108002
	POLG2	-0.0940977	0.00439473
	LOC100129362	-0.094072	0.00397202
	NTRK2	-0.094015	2.59e-05
	LOC441066	-0.0939789	0.00980809
	CART1	-0.0939453	0.0105047
	CD99L2	-0.0939335	9.98e-05
	LOC652455	-0.0939095	0.00932419
	LOC401252	-0.0938911	0.000480586
	IFI27L1	-0.0938899	0.0388637
	SMARCA1	-0.0938231	9.75e-06
	SNRNP70	-0.0938135	0.000252474
	STEAP2	-0.0937397	3.37e-05
	LOC100133265	-0.0937296	0.00200152
	FUNDC2	-0.0937262	0.00049439
	DCBLD2	-0.0937256	3.7e-05
	RBP7	-0.0936396	0.00202287
	TCF7L2	-0.0936153	0.00455392
	AIF1L	-0.0936002	0.00350191
	TESK1	-0.0935562	0.00010432
	PGRMC2	-0.0935166	1.37e-06
	GLI3	-0.0935031	0.000550042
	NLRP8	-0.0934714	0.000811566
	DNAJC24	-0.0934358	5.14e-05
	ETV3	-0.093405	0.00633835
	LZTFL1	-0.0933691	0.00384184
	WNT11	-0.0933349	2.14e-05
	SNORA16A	-0.0932937	9.88e-05
	NLGN2	-0.0932173	0.000171765
	ORC2L	-0.0931742	8.44e-05
	CDC16	-0.0931409	7.38e-06
	XAB2	-0.0931354	0.00573334
	ZNF805	-0.0931167	0.000110771
	LOC652685	-0.0930828	0.000960377
	TNS3	-0.0930379	0.000738163
	APCDD1	-0.0929748	0.00145348
	SPAG16	-0.092973	3.53e-06
	ADCY2	-0.0929662	0.00091455
	PCF11	-0.0929651	5.23e-05
	ROPN1	-0.0929525	0.00447974
	ZNF33A	-0.0929492	4.04e-05
	TYSND1	-0.0928329	1.42e-06
	LOC100128126	-0.0927518	0.00239651
	LOC100129982	-0.0927156	7.55e-05
	PTBP2	-0.0926553	0.00181196
	ZNF692	-0.0926353	0.0113212
	ZNF621	-0.0925737	0.00171747
	SGSM2	-0.0925605	0.00184648
	RAB40C	-0.092516	3.81e-05
	ZNF311	-0.0924601	0.00747508
	MOV10	-0.0924393	0.000259273
	LOC650200	-0.0923843	2.23e-05
	NHLRC3	-0.0923172	6.1e-05
	SMARCAD1	-0.0922632	0.00264048
	LOC100130516	-0.0921853	0.00655934
	ANKRD6	-0.0921769	2.13e-05
	KIF21A	-0.0921373	0.0119803
	HOTAIR	-0.092113	0.0433696
	BCYRN1	-0.0920363	0.00383655
	PLEKHA1	-0.0920346	2.08e-05
	CSRNP3	-0.0919899	0.000202369
	PCMTD1	-0.0919021	0.000238296
	HNRPDL	-0.0918372	2.78e-05
	MYO3B	-0.0917576	0.00379246
	SEMA3E	-0.0917061	0.001165
	COL17A1	-0.0916868	0.000208146
	RBM17	-0.0915875	4.24e-06
	LOC400214	-0.0915197	0.0145063
	CADM4	-0.0914783	0.0047746
	SMYD4	-0.0914693	0.00392112
	VGLL3	-0.0914543	0.00104787
	CCBE1	-0.0914192	0.00130034
	ITPR3	-0.0914163	1.83e-05
	KLF2	-0.0914141	0.00543464
	ZNF763	-0.0914086	0.00768906
	MEF2C	-0.0914084	0.0045035
	PHIP	-0.0914	0.000191076
	COPS7B	-0.0913965	6.48e-06
	RAB12	-0.091342	0.00133339
	ZNF287	-0.0913394	4.24e-05
	KIAA0195	-0.0913168	0.0015806
	GAMT	-0.0913122	0.000263206
	JAG2	-0.0912886	3.2e-05
	LOC100144604	-0.0912787	6.14e-05
	LOC642109	-0.0912447	0.0120623
	TBC1D20	-0.0911841	0.000129829
	ATL1	-0.0911315	0.00164728
	ITPKB	-0.091037	0.00270496
	BIRC6	-0.0910084	1.83e-05
	FLJ45256	-0.0909756	1.18e-05
	LOC646034	-0.0909402	1.11e-05
	ORAI3	-0.0909393	0.000123401
	NAT9	-0.0909313	2.71e-06
	FLJ36131	-0.0909034	0.000991589
	NMT1	-0.0908986	0.000256654
	BCL2	-0.0908903	0.000126747
	LOC284297	-0.0908842	0.000149727
	DSEL	-0.0908033	1.7e-07
	APPL1	-0.0907936	4.32e-06
	FLJ37512	-0.0907699	9.13e-05
	GEMIN4	-0.0907554	2.89e-06
	FAR1	-0.0907171	0.000128623
	ECHDC2	-0.0907129	0.000470051
	CDK5RAP3	-0.0906983	0.000478233
	ASB3	-0.0906703	7.61e-05
	RXRB	-0.0906292	5.81e-05
	SNAPC1	-0.0905763	0.000215516
	LOC100129781	-0.0905735	0.0429331
	PXN	-0.0905486	1.01e-05
	RGMA	-0.0905286	0.00046057
	ZNF605	-0.0904355	0.00103634
	RFX1	-0.0903956	0.00906752
	SNORD3D	-0.0903547	0.0121196
	LRIG2	-0.0903328	0.00901941
	ZNF438	-0.0902808	0.000442977
	HABP4	-0.0902682	3.31e-05
	FTHL11	-0.0902093	1.45e-05
	GATAD1	-0.0901228	1.44e-05
	LOC644935	-0.090104	2.9e-05
	LOC100131253	-0.0900838	0.00510692
	LOC90586	-0.0900555	0.000171086
	HCG26	-0.0900542	0.000318882
	GPR162	-0.0900501	8.64e-05
	LOC388588	-0.0899863	0.00359843
	ARGLU1	-0.0899805	6.07e-05
	MT1F	-0.0899583	0.00916362
	C20orf117	-0.0899433	5.71e-06
	LSS	-0.0898638	8.13e-06
	OSGEP	-0.0898554	0.00179208
	SPRED1	-0.0898182	0.001165
	LOC647288	-0.0897261	0.00365902
	LOC284023	-0.0896982	0.00152018
	NOTCH3	-0.0896978	0.000136023
	RG9MTD2	-0.089639	0.00381884
	CLOCK	-0.0896174	0.000794809
	ENPP5	-0.0895762	0.000913887
	TTC15	-0.0895757	4.21e-05
	SH3BP4	-0.0895599	0.000650765
	EML2	-0.0894998	0.00259428
	APBB3	-0.0894305	0.0187294
	LOC644949	-0.0894261	0.000687287
	HMGB1	-0.0893627	0.00195294
	CCDC136	-0.0893522	0.00776354
	ATG10	-0.0892969	0.000232921
	BZRAP1	-0.0892814	0.00160082
	ALS2CR16	-0.089271	0.00339929
	OSBPL5	-0.0892442	0.000245747
	LOC284276	-0.089147	0.000832899
	C14orf181	-0.0891413	1.76e-05
	LIF	-0.0891333	9.9e-05
	LOC100134182	-0.0891063	0.000442977
	FAM13A	-0.0889718	0.00106739
	DNAL4	-0.0889716	0.00060145
	LOC387753	-0.0889586	6.42e-05
	ARHGEF6	-0.0888707	0.000146142
	COL18A1	-0.0888566	3.43e-06
	KCNQ1OT1	-0.0887317	0.000254745
	DDAH2	-0.0887287	0.00340243
	SMOC2	-0.0886828	0.000380167
	KIAA0363	-0.0886732	1.26e-05
	LOC648366	-0.0886431	0.00802943
	ANO9	-0.0886344	0.00323191
	XRN1	-0.0886136	4.86e-06
	RNU4-1	-0.0885585	9.19e-05
	ZNF543	-0.0884963	2.24e-05
	C15orf63	-0.0884728	0.00143469
	FAM110B	-0.0883571	1.56e-05
	FAM188A	-0.0883354	6.98e-05
	LEPREL2	-0.0883078	0.000374354
	LOC728791	-0.0882935	0.000303631
	PTGDS	-0.088276	0.0181392
	RAB40B	-0.0882705	1.88e-05
	RAPGEF2	-0.0882103	0.000616723
	MICAL1	-0.0881391	0.00495763
	ZNF141	-0.0881372	0.00019899
	C8orf48	-0.0880368	0.000193897
	C21orf122	-0.0880302	0.000681465
	TSC22D3	-0.0880041	0.000429155
	HHAT	-0.0879787	0.00249099
	ANKRD12	-0.0879383	0.000102109
	TTC32	-0.0879127	0.000228917
	AP1S2	-0.0879045	0.000101802
	VWA2	-0.0878959	0.000662342
	CGB1	-0.0878837	0.000111611
	LOC728903	-0.0878677	0.00230331
	CCDC106	-0.0878479	0.0002513
	FAHD2B	-0.087818	0.000502144
	C1orf152	-0.0877764	0.000311057
	TSPYL5	-0.0877761	0.0293057
	LOC653073	-0.0876637	0.00137445
	MT1A	-0.0875987	0.000287564
	LOC729446	-0.0875862	2.83e-05
	PPP1R13L	-0.0875151	3.61e-05
	HLA-DQA2	-0.0875038	0.00203472
	NR1D2	-0.0873592	0.0159104
	ZNF346	-0.0873437	0.00029048
	FAM13B	-0.0873421	0.000713814
	ZNF343	-0.087289	1.37e-05
	LPCAT2	-0.0872738	0.0129244
	LYSMD4	-0.0872529	9.55e-06
	ZNF302	-0.0871826	1.12e-05
	ARHGEF19	-0.0871473	0.00920338
	DCHS1	-0.0871172	5.68e-06
	WDR23	-0.0870639	4.28e-05
	DNASE2	-0.0870133	0.000501417
	RHOJ	-0.0869792	7.89e-05
	NPFF	-0.0869425	0.00397448
	LIFR	-0.0868682	0.00824167
	LOC155060	-0.0868463	0.000841242
	NLK	-0.0868058	0.00273369
	GREM2	-0.0867934	8.62e-05
	TTLL3	-0.0867667	0.00030071
	CLK3	-0.0867478	1.29e-05
	LOC648099	-0.0866074	1.07e-05
	METT11D1	-0.0865984	6.43e-06
	LOC643287	-0.0865943	8.4e-05
	PIAS1	-0.0865188	4.68e-05
	KIAA1467	-0.0865169	0.00164059
	CBR4	-0.0864808	0.000156668
	PRRX2	-0.0864598	7.27e-05
	LOC158160	-0.0864211	0.000384235
	HIC2	-0.0864193	0.0025579
	GSTM1	-0.0864024	0.023821
	RAB2B	-0.086291	4.25e-05
	HDAC6	-0.0862869	0.000105983
	PDGFD	-0.0862335	4.06e-05
	ZFP90	-0.0861284	0.00225949
	DFNB59	-0.0861283	0.000142014
	CLASP1	-0.0860171	0.000600597
	KIAA1641	-0.0860156	3.36e-07
	ISYNA1	-0.0860011	0.000382792
	FAM76B	-0.0859996	0.00287315
	TMBIM1	-0.0859647	9.06e-06
	MMS19	-0.085962	2.94e-05
	BBX	-0.0859615	3.26e-05
	ZC3H18	-0.0859537	0.000417112
	SETX	-0.0859407	0.000174707
	DMXL1	-0.0859367	0.00477422
	C1orf69	-0.0859358	0.000319915
	FAM154A	-0.085903	0.00239858
	CABIN1	-0.0858208	0.00161491
	AP4B1	-0.0857962	0.000277756
	DDIT3	-0.0857791	0.0142395
	ADAMTS9	-0.0857095	0.00154038
	LGALS9B	-0.0857089	6.69e-06
[truncated: 7,512 more rows]

## Sheet: DMGs
DEGs based on GSE63315	gene	logFC	pValue
	A1CF	0.0773272	0.00111458
	AAA1	0.0194133	0.0100445
	AACS	0.0576119	0.00037128
	AACSL	-0.102485	2.21881e-05
	AADACL2	0.15333	0.0144925
	AADACL3	-0.0383571	0.00037128
	AAGAB	0.145677	7.39602e-07
	AANAT	-0.0588471	0.00231643
	AARS2	-0.0688524	7.17414e-05
	AASDHPPT	-0.0489432	0.0172712
	AASS	-0.0280677	0.00681174
	AATK	-0.0318992	0.012094
	ABCA1	-0.0578473	0.0144925
	ABCA12	0.2254	0.000102805
	ABCA2	-0.0178259	0.000144222
	ABCA6	-0.341112	0.00231643
	ABCA8	0.100171	0.0120042
	ABCB1	0.0682774	0.000109243
	ABCB5	0.0352156	0.00182978
	ABCC10	0.0640216	8.87523e-06
	ABCC11	-0.0245809	0.00231643
	ABCC2	-0.0425801	0.00291403
	ABCC3	-0.122828	8.87523e-06
	ABCD2	-0.117619	0.00037128
	ABCF2	-0.0659225	0.000495534
	ABCG1	-0.0480881	0.00231643
	ABCG4	-0.0527714	0.00829316
	ABHD1	-0.0618076	0.00555959
	ABHD13	-0.0462104	0.0178765
	ABHD15	-0.120615	3.32821e-05
	ABHD2	0.0494105	0.000996149
	ABHD3	-0.434043	2.95841e-06
	ABHD4	-0.0545764	0.00037128
	ABI3BP	0.0756065	7.39602e-07
	ABL2	0.0197579	0.012094
	ABR	0.0198908	0.0172712
	ABRA	0.0386433	0.00110341
	ABTB2	0.0193194	0.00231643
	ACAA2	-0.113549	0.000656027
	ACACA	0.0687837	7.39602e-07
	ACACB	0.0469312	7.17414e-05
	ACAD9	-0.0470899	0.00451305
	ACADM	-0.376817	7.17414e-05
	ACADS	0.0394686	0.000102805
	ACAP3	0.0552348	0.000654772
	ACAT1	0.124708	7.39602e-07
	ACBD3	0.0432101	0.00164818
	ACBD6	0.0266355	0.00291403
	ACCN1	-0.0234121	0.0100445
	ACCN4	-0.071563	0.00037128
	ACCS	0.131196	7.39602e-07
	ACMSD	-0.0888124	5.17722e-06
	ACN9	0.0349643	0.00143261
	ACO2	-0.0512623	0.0120042
	ACOT4	-0.0380578	0.000144222
	ACOT7	0.0222459	0.012094
	ACP2	-0.0286021	0.0130228
	ACPL2	0.0415239	0.00143261
	ACRBP	-0.0984627	0.0144925
	ACSBG1	0.0774202	0.000495534
	ACSBG2	-0.0656925	0.000656027
	ACSF3	0.0173803	0.000274392
	ACSL1	0.0487226	2.21881e-05
	ACSL3	0.0327851	8.87523e-06
	ACSL5	-0.0365017	0.00148906
	ACSS1	0.157993	2.95841e-06
	ACTA2	0.091689	2.21881e-05
	ACTL6A	-0.128022	0.00231643
	ACTL7A	0.015419	0.0101439
	ACTL7B	-0.0125321	0.00557329
	ACTN4	-0.0663115	0.000383076
	ACTR10	-0.0661063	0.0172712
	ACTR1A	-0.186562	0.00110341
	ACTR3B	0.0259061	0.00858666
	ACVR1B	-0.0393225	0.00231643
	ACVR2B	0.026103	0.000495534
	ACYP1	-0.0649965	0.00182978
	ADA	-0.038477	0.00860111
	ADAM11	-0.0684432	0.000102805
	ADAM15	0.0350354	0.00322822
	ADAM17	0.0513527	4.95534e-05
	ADAM20	0.0175531	0.0144925
	ADAM29	-0.0820449	8.87523e-06
	ADAMTS3	-0.0864466	0.00555959
	ADAMTS5	-0.0402541	0.00291403
	ADAMTS9	-0.040207	0.00354263
	ADAR	-0.0586796	0.000495534
	ADARB1	0.0679919	2.21881e-05
	ADARB2	0.0148932	0.00387691
	ADAT3	0.163746	4.67707e-05
	ADCY2	0.0275118	0.000656027
	ADCY6	0.0371876	0.000201172
	ADCY7	-0.0564602	2.95841e-06
	ADCY9	0.0381732	2.95841e-06
	ADCYAP1R1	-0.0496575	0.000590412
	ADD3	0.170698	7.39602e-07
	ADH1B	-0.0850688	0.00182978
	ADH4	-0.181946	0.00291403
	ADH6	0.0411252	0.00037128
	ADHFE1	-0.0438182	0.00037128
	ADI1	0.0303959	0.0165514
	ADM	-0.103297	0.00163663
	ADM2	-0.091205	0.00231643
	ADO	0.0969771	0.0144925
	ADORA2B	0.0975014	3.32821e-05
	ADPRH	0.0762407	0.000857939
	ADPRHL1	0.0142847	0.00509828
	ADRA1B	-0.0515372	0.000656027
	ADRB2	0.213459	0.00182978
	ADRBK1	-0.0584191	4.67707e-05
	ADRBK2	0.0691003	0.00037128
	ADSS	0.0294871	0.00363662
	ADSSL1	-0.0239407	0.000495534
	AEBP2	0.0474262	0.00451305
	AFAP1	0.0246661	0.000495534
	AFF1	0.0685707	1.4792e-06
	AFF4	-0.0452851	0.00555959
	AFM	0.0285226	0.00143261
	AFP	0.18959	3.32821e-05
	AGAP1	0.0349874	0.000122509
	AGAP11	0.0809547	0.000102805
	AGAP2	0.136461	0.00037128
	AGAP3	0.0539063	3.6442e-05
	AGAP5	-0.0148642	0.012094
	AGAP6	-0.0249309	0.0130228
	AGAP7	0.0251962	0.00451305
	AGAP8	-0.0320858	0.00681174
	AGBL1	-0.0180663	0.012094
	AGER	0.0909329	8.87523e-06
	AGGF1	-0.0222958	0.0172712
	AGK	0.0574326	4.95534e-05
	AGL	0.0397256	0.00789825
	AGMAT	-0.0227397	0.0172712
	AGPAT1	0.0275763	0.00354263
	AGPAT3	0.0314414	0.000274392
	AGPAT6	0.0344652	4.95534e-05
	AGR2	0.0649817	0.00829316
	AGR3	0.143262	0.00291403
	AGRN	0.0187135	0.00363662
	AHCY	0.0436855	0.000102805
	AHDC1	0.145477	7.39602e-07
	AHI1	0.0247105	0.00451305
	AHNAK	0.0852057	0.00231643
	AHSG	0.035743	0.00231643
	AICDA	0.0313631	0.00231643
	AIFM3	0.0297943	0.00789825
	AIM1L	0.0484312	7.39602e-07
	AIM2	-0.217839	0.0100445
	AIMP2	0.0594731	1.4792e-06
	AJAP1	0.0188973	0.0172712
	AK1	0.0932744	7.39602e-07
	AK2	-0.0766561	0.000656027
	AK7	-0.0590694	0.00291403
	AKAP3	0.0132201	0.00829316
	AKAP6	-0.0408533	0.00182978
	AKIRIN2	0.0791833	0.0100445
	AKNAD1	0.0502247	0.0172712
	AKR1B1	-0.036498	0.0172712
	AKR1B10	0.0657271	0.00231643
	AKR1CL1	0.0716691	0.00111458
	AKR1E2	-0.0593268	0.0179014
	ALAD	0.0548103	0.000590412
	ALB	0.050479	2.21881e-05
	ALDH18A1	0.0409613	0.000729531
	ALDH2	-0.0626255	0.00363662
	ALDH3A1	0.233119	0.000656027
	ALDH3B1	-0.0748662	0.00037128
	ALDH6A1	-0.038297	0.00724728
	ALG12	-0.0410039	0.000898609
	ALG1L2	-0.0327517	0.0100445
	ALG6	-0.0344538	0.0144925
	ALKBH1	-0.0369249	0.00829316
	ALKBH3	0.0610441	0.000857939
	ALKBH6	-0.0814331	0.00555959
	ALKBH7	-0.148329	2.21881e-05
	ALOX12	0.176846	4.67707e-05
	ALOX12P2	0.103689	0.00363662
	ALOX5AP	-0.0251925	0.0101767
	ALPI	-0.0418916	0.0100445
	ALPK1	0.0274086	0.00681174
	ALPK2	0.326346	8.87523e-06
	ALS2CL	-0.0769308	2.95841e-06
	ALS2CR12	0.109385	0.00231643
	ALS2CR4	0.101208	0.00363662
	AMAC1	0.202522	0.00231643
	AMAC1L2	0.052964	0.00182978
	AMBRA1	0.0409991	0.00024544
	AMD1	-0.0385035	0.00423976
	AMFR	0.0154911	0.00363662
	AMICA1	0.0249074	0.00291403
	AMIGO1	-0.0790533	0.00164818
	AMIGO2	-0.0487264	0.0120042
	AMMECR1L	0.0603754	5.17722e-06
	AMOTL1	0.0453381	0.000383076
	AMOTL2	0.0705538	0.000274392
	AMPD3	-0.11832	0.00182978
	AMT	-0.113634	5.17722e-06
	ANAPC1	-0.0782763	0.00182978
	ANAPC10	-0.0794257	0.00111458
	ANAPC11	-0.128107	0.000144222
	ANGEL1	-0.0405859	0.00182978
	ANGPTL2	0.353238	0.000274392
	ANGPTL5	0.0974743	0.000144222
	ANGPTL7	-0.0123621	0.00163279
	ANKDD1A	0.0787815	3.32821e-05
	ANKFY1	0.0488983	2.95841e-06
	ANKHD1-EIF4EBP3	0.106414	0.000656027
	ANKIB1	0.171486	1.4792e-06
	ANKK1	0.098315	0.00451305
	ANKMY1	0.0307323	0.000274392
	ANKMY2	0.118584	0.000857939
	ANKRD13D	-0.0709458	0.000144222
	ANKRD16	0.0838985	0.00037128
	ANKRD19	0.083843	0.00143261
	ANKRD20A1	-0.135571	0.012094
	ANKRD24	-0.0273809	0.0172712
	ANKRD28	0.0351567	0.00555959
	ANKRD29	-0.0337972	0.00231643
	ANKRD37	0.224427	0.000588785
	ANKRD44	0.0527804	0.00111458
	ANKRD50	0.134974	0.00291403
	ANKRD55	0.0337434	0.000898609
	ANKRD57	0.361112	0.00829316
	ANO10	0.0172063	0.00555959
	ANO6	0.0508416	5.17722e-06
	ANO7	-0.0347466	0.000656027
	ANO8	-0.0646508	0.00829316
	ANP32A	0.0403161	0.00231643
	ANTXR1	0.0350041	0.000102805
	ANTXR2	0.0385281	0.00388466
	ANTXRL	0.0688667	1.4792e-06
	ANUBL1	0.10475	7.39602e-07
	ANXA4	0.046461	0.012094
	ANXA8L1	0.0636754	2.21881e-05
	ANXA9	0.263739	0.000102805
	AOX2P	0.0399738	7.17414e-05
	AP1G1	0.0227397	0.00555959
	AP1M1	-0.121081	0.000201172
	AP1M2	0.0331933	0.0152916
	AP1S1	-0.043195	0.00829316
	AP1S3	-0.0756316	0.000144222
	AP2A2	0.0251529	0.00182978
	AP3B1	0.0450694	5.17722e-06
	AP3D1	0.017733	0.00555959
	AP3S1	0.0774333	5.98359e-05
	AP3S2	-0.261368	7.39602e-07
	AP4B1	-0.0782132	0.00363662
	APBA2	-0.0233065	0.00829316
	APBA3	-0.0116855	0.00829316
	APBB2	0.0329721	0.00182978
	APBB3	-0.0297597	0.012094
	APC2	-0.0988377	0.00451305
	APCDD1	0.119718	0.000857939
	APCS	-0.0465192	0.00555959
	APLF	-0.0488747	0.00451305
	APOB48R	-0.0332638	0.000857939
	APOBEC2	0.100107	0.00451305
	APOBEC3G	0.0610829	7.17414e-05
	APOC4	0.0225333	0.0152916
	APOD	0.0576568	7.39602e-07
	APOH	0.0229238	0.00451305
	APOL1	-0.0798617	0.00681174
	APOL3	-0.0964888	5.17722e-06
	APOL5	-0.0631744	0.012094
	APP	-0.0718295	0.00231643
	APPL2	0.0392525	0.000495534
	APRT	-0.0746241	0.00231643
	AQP12B	-0.112839	0.000274392
	AQP2	-0.0200959	0.00509828
	AQP5	-0.0868679	0.0100445
	AQP6	-0.0375969	0.00143261
	AQP7P1	-0.0432858	7.17414e-05
	AQP9	0.322478	0.00354263
	ARC	0.0642448	0.00509828
	AREG	-0.317185	0.00143261
	ARF1	-0.0823782	0.000144222
	ARF4	-0.10384	0.00860111
	ARF6	-0.106745	0.00132467
	ARFGAP2	0.0490771	0.00681174
	ARFRP1	-0.0731097	0.00143261
	ARHGAP1	0.0228501	0.00354263
	ARHGAP10	0.0395818	2.95841e-06
	ARHGAP17	-0.0482048	0.000274392
	ARHGAP21	-0.0994185	0.00220878
	ARHGAP25	-0.0708181	5.17722e-06
	ARHGAP28	0.0429836	0.00037128
	ARHGAP5	-0.160735	4.95534e-05
	ARHGAP8	-0.123112	3.32821e-05
	ARHGAP9	-0.0920166	1.4792e-06
	ARHGDIA	-0.117028	0.00111458
	ARHGDIB	-0.0729824	0.000274392
	ARHGDIG	-0.0545539	0.0100445
	ARHGEF10	0.0201987	8.87523e-06
	ARHGEF10L	0.0269241	0.00363662
	ARHGEF15	0.118806	0.00293945
	ARHGEF18	0.0359417	2.21881e-05
	ARHGEF2	-0.0260591	0.00681174
	ARHGEF3	0.0300156	0.0172712
	ARHGEF5	0.0501354	0.000656027
	ARHGEF7	0.0235442	0.00509828
	ARID1A	-0.0406225	4.95534e-05
	ARID1B	0.0670868	2.95841e-06
	ARID2	0.0500534	4.67707e-05
	ARID4B	0.121918	2.95841e-06
	ARID5B	0.047305	0.000201172
	ARIH1	0.0346158	0.00829316
	ARIH2	-0.181134	1.4792e-06
	ARL13B	0.0637122	8.87523e-06
	ARL15	0.0877325	7.39602e-07
	ARL17B	-0.219648	8.87523e-06
	ARL4A	0.120713	0.00164818
	ARL5C	-0.0426926	0.00829316
	ARL6IP5	0.0555443	0.000495534
	ARL8A	0.103076	7.39602e-07
	ARMC1	0.0827033	0.000857939
	ARNTL2	-0.0763614	0.0100445
	ARPC1A	0.0437515	0.00388466
	ARPC5L	-0.0811477	0.0172712
	ARPM1	0.0662003	0.00388466
	ARRB1	-0.038437	0.000383076
	ARRDC3	0.0351828	0.00829316
	ARRDC4	0.276212	7.63079e-05
	ARSI	0.0592595	0.00181855
	ARSJ	0.0871697	0.00354263
	ART4	0.165665	0.00231643
	ARV1	0.0287474	0.00509828
	ARVCF	-0.017935	0.00681174
	AS3MT	0.121474	0.00111458
	ASAH1	0.0419692	0.0101767
	ASAP1	0.0829751	1.4792e-06
	ASB1	-0.0414395	0.000495534
	ASB15	0.0711983	7.17414e-05
	ASB2	-0.091525	7.39602e-07
	ASB6	0.0706208	0.00231643
	ASB7	0.036664	0.00555959
	ASB8	0.0399379	0.00829316
	ASCC3	0.0554826	0.00182978
	ASGR1	-0.0763041	0.000144222
	ASNA1	-0.193606	0.000274392
	ASPA	0.0797768	7.17414e-05
	ASPH	0.0625593	1.4792e-06
	ASPHD2	0.0300067	0.00363662
	ASPRV1	-0.0386655	0.00681174
	ASPSCR1	0.0582777	5.17722e-06
	ASRGL1	-0.0265924	0.0100445
	ASS1	0.0345531	4.95534e-05
	ASTN2	-0.0227215	0.0144925
	ASXL1	0.0560444	0.00037128
	ATAD2B	0.0623611	0.00451305
	ATAD3C	-0.0661852	5.17722e-06
	ATE1	0.0331238	0.0100445
	ATF4	-0.103131	0.000495534
	ATF5	-0.0308731	0.0172712
	ATF6	0.0360528	0.00451305
	ATF7IP	-0.0404004	0.000857939
	ATF7IP2	0.0704356	3.32821e-05
	ATG10	0.143794	0.000102805
	ATG12	0.164678	0.00182978
	ATG16L2	0.140877	2.95841e-06
	ATG2B	0.0411143	0.000201172
	ATG4B	-0.0275364	0.00182978
	ATG4D	-0.0374974	0.00829316
	ATG5	-0.0493349	0.00037128
	ATG9B	-0.0418397	0.0165514
	ATL1	0.0480639	0.000201172
	ATL3	-0.0255624	0.0172712
	ATN1	-0.0848737	1.40524e-05
	ATOH8	-0.0862095	7.39602e-07
	ATOX1	0.139367	2.95841e-06
	ATP10B	0.0827688	0.000102805
	ATP11A	0.0288014	2.95841e-06
	ATP12A	-0.0560177	0.00363662
	ATP13A3	0.0788035	2.95841e-06
	ATP13A5	0.0591871	0.00291403
	ATP1B1	-0.233839	0.000195533
	ATP1B3	-0.0848965	0.00143261
	ATP2B1	-0.0872551	7.39602e-07
	ATP2B2	-0.0335697	7.17414e-05
	ATP5B	-0.0660577	0.000590412
	ATP5C1	0.0450909	0.0165514
	ATP5G2	0.0852681	0.00291403
	ATP5L	0.127251	0.000193656
	ATP5SL	-0.065906	0.000274392
	ATP6V1A	0.152788	5.17722e-06
	ATP6V1B2	-0.0940223	0.00724728
	ATP6V1C2	0.046614	0.00555959
	ATP6V1D	0.026634	0.00466016
	ATP6V1E1	-0.0816202	0.000144222
	ATP8A1	0.0493259	0.000476325
	ATP8B1	-0.0832851	7.39602e-07
	ATP8B3	-0.0700112	0.000274392
	ATP9B	0.0317403	0.00935935
	ATPAF2	-0.0965768	0.00143261
	ATPBD4	0.0478969	0.000174318
	ATPGD1	0.0377682	0.00451305
	ATPIF1	-0.0645173	0.00182978
	ATRN	0.0304367	0.00451305
	ATXN1	0.0192267	0.0100445
	ATXN7	0.0846899	7.39602e-07
	ATXN7L1	0.048652	4.95534e-05
	ATXN7L3	0.0512769	0.00829316
	AUH	-0.173076	3.32821e-05
	AUP1	-0.01523	0.000857939
	AURKA	-0.203429	7.39602e-07
	AURKAIP1	-0.0962786	0.00182978
	AURKB	-0.0669024	4.95534e-05
	AUTS2	0.0501763	4.67707e-05
	AVL9	-0.0398941	0.012094
	AVP	-0.0350477	0.00363662
	AXL	0.0463597	0.012094
	AZGP1	-0.0414535	7.17414e-05
	AZI1	0.02886	0.00681174
	AZI2	0.0401521	0.00143261
	B2M	-0.0505544	0.0144925
	B3GALT2	0.129512	0.000144222
	B3GALT5	-0.0482055	0.00037128
	B3GALT6	0.0247753	0.000144222
	B3GAT1	-0.0312897	0.000144222
	B3GNT1	0.126358	0.00111458
	B4GALNT3	0.033441	0.000809985
	BACH1	0.0815078	0.00555959
	BACH2	-0.076019	7.17414e-05
	BAG3	-0.0958405	5.17722e-06
	BAG4	0.206913	0.00291403
	BAGE	-0.0468376	0.00555959
	BAHCC1	0.0401185	1.4792e-06
	BAHD1	0.0274041	0.0100445
	BAI1	-0.102823	7.17414e-05
	BAIAP2L1	0.0372202	0.00111458
	BAIAP2L2	0.131631	0.00555959
	BANP	0.0203841	0.000656027
	BARX2	-0.0615312	0.012094
	BASE	-0.0765033	0.00143261
	BASP1	0.071277	4.11421e-05
	BAT1	-0.0635852	0.000144222
	BAT2	0.0176628	0.00555959
	BAT3	-0.0364706	0.000857939
	BATF3	0.054379	0.0100445
	BAX	0.0839402	0.000138215
	BAZ1A	0.0356812	0.00555959
	BBS10	0.0628309	0.000857939
	BBS2	0.216324	5.17722e-06
	BBS9	0.0443065	0.000274659
	BBX	0.0326879	0.000809985
	BCAP29	-0.0830348	1.4792e-06
	BCAR1	0.0782938	7.39602e-07
	BCAS3	0.0344914	2.95841e-06
	BCAT1	-0.0450488	0.00451305
	BCHE	0.0841184	0.00182978
	BCKDK	-0.0419689	0.0144925
	BCL10	-0.0586826	0.00182978
	BCL11B	0.0965741	0.00291403
	BCL2	0.0608466	0.000144222
	BCL2L1	0.261886	0.00363662
	BCL2L12	0.0339527	0.00451305
	BCL2L13	-0.0775118	0.00681174
	BCL2L14	-0.0678433	0.00451305
	BCL2L2	-0.0737499	0.0100445
	BCL3	-0.0757145	0.00143261
	BCL7A	0.0265226	0.000590412
	BCL7C	0.113844	0.00322822
	BCL9	0.0401735	0.000274392
	BCL9L	0.0660777	0.000495534
	BCMO1	0.0629432	0.000274392
	BCO2	-0.0388589	0.00182978
	BDKRB1	0.0320515	0.00182978
	BDKRB2	0.0420981	0.00111458
	BEAN	-0.050747	2.21881e-05
	BEND3	0.0175569	0.012094
	BEND7	0.0191596	0.0172712
	BHLHA15	-0.0239956	0.0172712
	BHLHE23	0.136404	0.00291403
	BHLHE40	-0.0875941	0.012094
	BHLHE41	0.603951	7.39602e-07
	BICC1	0.0184118	0.0100445
	BICD1	0.0276614	0.00860111
	BID	0.0224916	0.0179014
	BIK	0.111204	0.000495534
	BIN2	-0.0333934	0.000857939
	BIRC3	-0.163963	0.00037128
	BIRC5	0.159939	0.000495534
	BIRC6	-0.0531188	0.000274392
	BLK	0.0147848	0.00789825
	BLMH	-0.0836605	0.00164818
	BLNK	-0.139748	0.000144222
	BLOC1S2	-0.171894	0.000274392
	BLOC1S3	-0.0720522	0.00789825
	BMP10	0.0247481	0.00037128
	BMP2	0.165868	8.87523e-06
	BMP2K	0.0607754	0.00465121
	BMP3	-0.0460272	0.012094
	BMP6	-0.0453307	0.00681174
	BMP8B	-0.0573	0.00681174
	BMPER	-0.0308521	0.012094
	BMPR1A	0.0488264	3.32821e-05
	BMS1P5	-0.297786	0.014117
	BNIPL	0.430872	0.000495534
	BOC	0.0850587	0.00143261
	BOP1	0.0302576	0.0144925
	BPGM	0.224091	7.17414e-05
	BPIL2	-0.033032	0.0179014
	BPTF	0.0449931	0.00111458
	BRAF	0.0425731	0.00466016
	BRAP	0.0664608	0.000857939
	BRCA2	0.157255	7.39602e-07
	BRD2	-0.0974093	5.17722e-06
	BRD3	0.0738316	3.6442e-05
	BRD8	-0.144218	1.40524e-05
	BRD9	0.0226412	0.000476325
	BRI3	0.231947	4.95534e-05
	BRSK1	0.0298516	0.00293945
	BRUNOL5	-0.057921	7.17414e-05
	BSG	-0.029745	0.00724728
	BSPRY	-0.0819659	0.00291403
	BST2	-0.0541845	0.00182978
	BTAF1	0.0276517	0.0130228
	BTBD1	0.108604	0.000857939
	BTBD12	-0.0522275	3.32821e-05
	BTBD19	0.0665787	0.00037128
	BTBD2	-0.0377848	0.000274392
	BTBD8	-0.039315	0.000996149
	BTBD9	0.0281044	0.00164818
	BTG1	-0.138246	0.00451305
	BTN3A1	0.0376723	0.00182978
	BTN3A3	-0.0838628	0.000729531
	BUB3	-0.0338647	0.00363662
	BYSL	-0.078618	0.00829316
	BZW2	0.0394104	0.00555959
	C10orf104	0.216945	1.40524e-05
	C10orf107	0.156782	0.00037128
	C10orf113	0.0366187	0.000274392
	C10orf116	0.329787	7.17414e-05
	C10orf118	0.141549	5.17722e-06
	C10orf119	-0.0601146	0.000476325
	C10orf120	-0.0315225	0.00425642
	C10orf125	-0.0681232	0.000274392
	C10orf129	0.173407	3.6442e-05
	C10orf140	0.0766083	0.00451305
	C10orf25	0.0313191	0.0144925
	C10orf26	0.192508	0.00182978
	C10orf41	-0.119466	0.00681174
	C10orf47	0.0780892	0.000495534
	C10orf55	0.141229	7.39602e-07
	C10orf57	0.122622	0.000201172
	C10orf67	0.141843	0.00291403
	C10orf71	0.0451126	0.0100445
	C10orf72	-0.161483	2.95841e-06
	C10orf75	-0.0375359	0.00608788
	C10orf84	0.0445359	0.00829316
	C10orf95	0.0645856	0.00829316
	C10orf99	-0.336682	7.39602e-07
	C11orf16	-0.0150347	0.00363662
	C11orf20	0.0808136	0.00723463
	C11orf21	-0.0870293	0.000307114
	C11orf24	0.0349418	0.0152694
	C11orf34	-0.0831706	0.000144222
	C11orf36	-0.0707943	0.00681174
	C11orf46	0.101341	0.00231643
	C11orf49	0.0464758	0.000144222
	C11orf52	0.127862	7.63079e-05
	C11orf57	-0.044665	0.0165514
	C11orf60	-0.114804	0.00829316
	C11orf61	-0.0724709	0.00363662
	C11orf63	0.0170159	0.00354263
	C11orf66	-0.0250762	0.00664488
	C11orf68	0.337548	3.32821e-05
	C11orf74	0.0481048	0.000530518
	C11orf80	0.0303271	0.00354263
	C11orf83	0.143964	2.21881e-05
	C11orf92	0.0327325	0.0100445
	C12orf11	-0.080224	0.0144925
	C12orf24	0.0114426	0.0164339
	C12orf34	0.133624	0.00037128
	C12orf36	-0.0649961	0.00111458
	C12orf4	-0.06149	0.000201172
	C12orf51	0.0153654	0.0130228
	C12orf57	-0.09991	0.0140961
	C12orf59	0.0252569	0.0172712
	C12orf65	0.0617411	0.00291403
	C12orf67	0.0209689	2.21881e-05
	C12orf69	0.0368724	0.00037128
	C12orf70	0.053666	0.000144222
	C12orf71	-0.175806	0.00291403
	C12orf74	0.101108	0.00182978
	C12orf76	0.0352246	0.00111458
	C13orf1	0.0789502	0.00182978
	C13orf15	-0.0532693	0.012094
	C13orf29	-0.308987	0.00291403
	C14orf1	-0.0642455	0.0172712
	C14orf109	-0.717894	7.39602e-07
	C14orf129	0.029561	0.00037128
	C14orf133	-0.0829118	0.000383076
	C14orf138	0.162823	7.39602e-07
	C14orf142	0.069086	0.0152916
	C14orf143	0.0456233	0.00451305
	C14orf145	0.0537466	0.00555959
	C14orf153	-0.0735824	0.00143261
	C14orf159	-0.0340633	0.0178516
	C14orf165	0.0547434	0.000656027
	C14orf174	0.0487126	0.00451305
	C14orf177	-0.0515556	7.39602e-07
	C14orf181	-0.115367	0.0144925
	C14orf182	0.066712	0.000656027
	C14orf19	0.0405581	0.00681174
	C14orf21	-0.0987804	0.00143261
	C14orf28	0.0588022	0.00111458
	C14orf34	-0.00826115	0.00724728
	C14orf38	-0.0610045	0.0100445
	C14orf4	0.165025	0.000896286
	C14orf43	0.0558846	0.000729531
	C14orf53	0.0470138	0.00363662
	C14orf64	0.14249	0.00291403
	C14orf72	0.0433236	0.00363662
	C14orf73	0.0784783	0.00182978
	C14orf80	0.0551663	0.000102805
	C14orf93	0.205018	0.00182978
	C15orf23	0.0551457	0.000809985
	C15orf27	0.0358829	0.00681174
	C15orf28	0.529394	1.4792e-06
	C15orf32	-0.0262153	0.000857939
	C15orf33	-0.0283617	0.00231643
	C15orf41	0.0669596	0.000195533
	C15orf43	-0.0141065	0.0100445
	C15orf5	-0.0875811	4.95534e-05
	C15orf55	0.0404402	0.00231643
	C15orf58	-0.0767192	0.00363662
	C15orf60	-0.019349	7.17414e-05
	C16orf3	0.0161764	0.00860111
	C16orf38	-0.0308497	0.000144222
	C16orf42	-0.0563541	0.00111458
	C16orf53	-0.159648	0.000137752
	C16orf54	-0.072127	2.95841e-06
	C16orf55	-0.0802043	0.00182978
	C16orf57	-0.0558128	0.00555959
	C16orf65	-0.192624	0.00829316
	C16orf67	-0.0634218	0.00363662
	C16orf68	-0.103131	4.95534e-05
	C16orf70	-0.149288	7.63079e-05
	C16orf78	-0.0469917	0.000590412
	C16orf79	-0.0211243	0.00829316
	C16orf88	-0.0355463	0.00363662
	C16orf89	-0.0739362	2.95841e-06
	C16orf93	-0.0277642	0.0110395
	C17orf101	0.0249279	0.000144222
	C17orf103	0.060024	0.00291403
	C17orf106	-0.33435	7.39602e-07
	C17orf28	-0.0728366	0.00555959
	C17orf47	-0.0213632	0.012094
	C17orf48	0.0744392	0.0144925
	C17orf62	-0.0455485	0.00291403
	C17orf71	0.0565134	0.00024544
	C17orf75	0.0788778	0.00243142
	C17orf77	-0.0656651	4.95534e-05
	C17orf79	0.0852412	2.95841e-06
	C17orf89	-0.123351	0.00220878
	C17orf90	-0.0821939	0.00291403
	C17orf91	0.187127	0.00037128
	C17orf93	0.151954	0.012094
	C17orf99	0.0423805	0.000656027
	C18orf54	-0.112393	0.000201172
	C18orf55	0.0399619	0.000102805
	C19orf12	0.0495314	0.00037128
	C19orf18	-0.0373544	0.00681174
	C19orf21	0.0265611	0.0165514
	C19orf22	-0.0629096	5.17722e-06
	C19orf26	0.110276	0.00451305
	C19orf33	-0.145887	0.000495534
	C19orf36	-0.0917102	0.00037128
	C19orf39	-0.0643811	0.00111458
	C19orf42	-0.0897951	0.00037128
	C19orf43	-0.0404384	0.012094
	C19orf45	-0.0627863	0.00037128
	C19orf50	-0.0529038	0.00555959
	C19orf57	-0.0869565	0.00363662
	C19orf59	-0.266434	0.000102805
	C19orf6	-0.038221	0.00267443
	C19orf60	-0.0748836	0.00829316
	C19orf61	-0.0970314	2.21881e-05
	C19orf62	-0.0732076	0.00451305
	C19orf66	-0.0585651	0.00466016
	C19orf70	-0.0159519	0.00724728
	C1GALT1	0.0492387	0.000656027
	C1QL3	0.0396196	0.0172712
	C1QTNF2	0.0717435	0.00143261
	C1QTNF3	0.0275517	0.0172712
	C1QTNF5	-0.052319	0.000201172
	C1RL	-0.0882935	0.00363662
	C1S	-0.0705345	3.32821e-05
	C1orf100	-0.0696324	0.000857939
	C1orf107	-0.0784465	0.00860111
	C1orf114	0.0509752	0.00555959
	C1orf116	0.145789	0.00555959
	C1orf126	-0.0269818	7.17414e-05
	C1orf129	0.0460194	0.0172712
	C1orf144	-0.0502072	0.000495534
	C1orf146	0.0254208	0.00231643
	C1orf150	-0.0707955	4.95534e-05
	C1orf151	-0.117099	7.39602e-07
	C1orf168	-0.222422	5.17722e-06
	C1orf173	-0.0407412	0.00451305
	C1orf180	-0.30174	8.87523e-06
	C1orf182	0.0584684	0.000274392
	C1orf183	0.0778346	0.000144222
	C1orf190	0.551678	2.21881e-05
	C1orf198	0.0293482	0.00388466
	C1orf200	-0.0508957	0.000495534
	C1orf201	-0.0663239	0.000102805
	C1orf203	-0.0534899	0.000495534
	C1orf204	0.366387	0.012094
	C1orf21	0.0359435	0.0172712
	C1orf210	0.1307	0.000495534
	C1orf212	-0.160277	2.95841e-06
	C1orf220	0.0604837	1.40524e-05
	C1orf227	0.0229525	0.00293945
	C1orf228	-0.0470591	0.0144925
	C1orf230	-0.100245	0.0144925
	C1orf26	0.0523818	0.000857939
	C1orf38	-0.0487826	0.000495534
	C1orf53	0.0509166	0.00143261
	C1orf54	0.0293584	0.0130228
	C1orf58	-0.0404326	0.00829316
	C1orf65	-0.35497	0.00363662
	C1orf66	0.0618822	0.00363662
	C1orf74	-0.0748661	0.00291403
	C1orf85	-0.0545308	0.00451305
	C1orf88	0.0479668	0.000155282
	C1orf89	-0.0523754	0.00182978
	C1orf91	-0.0841422	0.00182978
	C2	0.0682898	8.87523e-06
	C20orf114	-0.0242252	0.0179014
	C20orf117	0.0360576	7.63079e-05
	C20orf141	-0.125496	2.95841e-06
	C20orf144	-0.0167498	0.00860111
	C20orf151	0.0309418	0.00110341
	C20orf152	0.0462605	0.00555959
	C20orf194	-0.119521	4.95534e-05
	C20orf195	-0.136749	4.95534e-05
	C20orf196	-0.10073	0.00829316
	C20orf197	-0.243927	7.39602e-07
	C20orf199	-0.152973	2.95841e-06
	C20orf200	-0.0418674	0.00037128
	C20orf202	0.0474657	0.00143261
	C20orf24	-0.0803905	0.00037128
	C20orf30	-0.0674524	0.000495534
	C20orf54	-0.203898	1.4792e-06
	C20orf70	-0.0266007	0.0144925
	C20orf71	-0.0914327	8.87523e-06
	C20orf72	-0.0794479	0.00829316
	C20orf95	-0.0929021	0.000529033
	C21orf2	-0.0829268	0.00293945
	C21orf57	-0.038925	0.00681174
	C21orf63	-0.181	0.000102805
	C21orf70	0.0926692	0.00182978
	C21orf90	-0.0372957	0.00182978
	C21orf94	-0.0728524	0.000102805
	C22orf13	-0.033225	0.0120042
	C22orf29	-0.0174421	0.0130228
	C22orf31	-0.0697179	0.0100445
	C22orf32	0.100689	4.67707e-05
	C22orf33	-0.0539649	0.000383076
	C22orf41	-0.223958	2.95841e-06
	C22orf9	0.0936204	5.17722e-06
	C2CD4C	-0.0749655	0.00829316
	C2orf18	0.0686198	0.00037128
	C2orf27B	-0.0755041	0.00829316
	C2orf3	0.0752199	0.00122127
	C2orf34	0.0534975	4.95534e-05
	C2orf42	0.0422933	0.00363662
	C2orf49	0.0828661	0.0172712
	C2orf54	0.096309	0.00555959
	C2orf56	0.060901	0.00231643
	C2orf57	0.0740695	0.00111458
	C2orf60	-0.0704239	0.00451305
	C2orf64	0.0376372	0.000274392
	C2orf67	0.0346101	0.0140751
	C2orf7	0.0280276	0.00291403
	C2orf71	0.0946005	1.40524e-05
	C2orf76	0.0552016	0.00143261
	C2orf83	0.0716971	0.000274392
	C2orf88	0.0449648	7.17414e-05
	C3AR1	-0.0475359	4.95534e-05
	C3orf15	0.0671403	0.00052755
	C3orf19	-0.0370362	0.0172712
	C3orf20	-0.104359	7.17414e-05
	C3orf21	0.0215208	0.000219156
	C3orf23	0.0374441	0.0120042
	C3orf25	0.0552654	7.39602e-07
	C3orf26	0.101655	7.39602e-07
	C3orf42	0.523997	7.39602e-07
	C3orf48	0.0235999	0.00681174
	C3orf49	0.0483256	3.6442e-05
	C3orf51	0.0491461	0.00789825
	C3orf52	0.106714	0.0144925
	C3orf57	0.0761868	9.70057e-05
	C3orf58	0.192579	3.6442e-05
	C3orf59	0.0434339	0.00363662
	C3orf63	-0.0365908	0.0144925
	C3orf64	0.155798	1.40524e-05
	C3orf66	-0.0545193	0.0100445
	C3orf72	-0.126957	8.87523e-06
	C3orf74	0.239139	0.00182978
	C3orf77	-0.0113468	0.00425642
	C4A	-0.0489315	0.012094
	C4B	-0.0597847	0.00388466
	C4BPA	-0.0577668	0.000383076
	C4BPB	-0.0420025	0.00664488
	C4orf11	0.016656	0.0120042
	C4orf21	0.052987	0.00037128
	C4orf26	-0.0934508	0.00182978
	C4orf29	-0.0670571	0.00111458
	C4orf34	-0.0656877	0.000195533
	C4orf36	0.0542097	0.000898609
	C4orf38	-0.04366	0.00451305
	C4orf41	-0.0674926	0.00164432
	C4orf42	0.0288412	0.00720934
	C4orf45	0.0440142	3.32821e-05
	C4orf47	0.0512905	0.000656027
	C5	0.0303939	0.00122127
	C5orf13	0.057413	1.4792e-06
	C5orf23	-0.0112226	0.00785771
	C5orf25	0.0572078	0.000274392
	C5orf27	-0.0540737	0.00789825
	C5orf30	0.0857647	8.87523e-06
	C5orf33	0.0663451	8.87523e-06
	C5orf36	0.0336001	0.00037128
	C5orf38	0.199977	0.0101603
	C5orf42	0.036881	0.0144925
	C5orf48	-0.0625423	0.00111458
	C5orf51	0.0357708	0.00681174
	C5orf53	0.195419	7.39602e-07
	C5orf55	0.145709	0.0172712
	C5orf56	-0.0618009	0.00935935
	C6orf105	-0.0923542	2.21881e-05
	C6orf106	-0.049223	0.00291403
	C6orf118	0.0259063	0.00466016
	C6orf125	-0.108126	2.21881e-05
	C6orf129	0.125631	2.21881e-05
	C6orf132	0.0973848	5.17722e-06
	C6orf138	0.138646	1.4792e-06
	C6orf142	0.0577958	1.4792e-06
	C6orf150	-0.13399	5.17722e-06
	C6orf154	0.267188	1.4792e-06
	C6orf162	0.0385513	0.000195533
	C6orf163	0.0350825	0.00608788
	C6orf168	0.0154369	0.00291403
	C6orf176	-0.0551901	0.00293945
	C6orf203	0.0541196	0.000201172
	C6orf208	0.0969808	7.17414e-05
	C6orf218	-0.154594	0.000495534
	C6orf223	-0.141682	1.4792e-06
	C6orf225	0.0224644	0.000993616
	C6orf226	0.121402	0.00241552
	C6orf26	0.0824115	0.000102805
	C6orf35	0.0341139	0.00231643
	C6orf47	-0.0369588	0.00425642
	C6orf48	-0.217914	5.98359e-05
	C6orf52	-0.0327446	0.0152916
	C6orf59	0.137762	0.00291403
	C6orf62	-0.0660653	0.0144925
	C6orf64	-0.0474619	0.00509828
	C6orf94	0.0409645	0.000102805
	C6orf97	-0.0292502	0.0152916
	C7orf20	0.0245005	0.00789825
	C7orf23	0.0609613	0.00037128
	C7orf26	0.024788	0.0101767
	C7orf30	0.113508	0.000495534
	C7orf34	0.0421997	0.0172712
	C7orf38	0.0711209	0.000274392
	C7orf40	-0.137574	5.17722e-06
	C7orf45	0.109373	0.0144925
	C7orf46	0.147157	8.87523e-06
	C7orf50	0.044227	7.39602e-07
	C7orf53	0.0749283	5.17722e-06
	C7orf55	0.0661606	0.00462439
	C7orf59	0.111041	0.000102805
	C7orf61	0.0367217	1.40524e-05
	C7orf63	0.11291	0.00451305
	C7orf70	-0.0441748	4.95534e-05
	C7orf72	0.0237989	0.0144925
	C8A	0.0633667	0.00037128
	C8B	-0.0431389	4.95534e-05
	C8orf12	0.0463434	0.00291403
	C8orf34	-0.0243937	0.0144925
	C8orf37	0.0578234	0.0144925
	C8orf40	0.0391665	0.000495534
	C8orf42	0.0646143	4.95534e-05
	C8orf45	0.0664401	0.000102805
	C8orf46	0.0268385	0.0100445
	C8orf55	-0.0806891	0.000857939
	C8orf58	0.13192	8.87523e-06
	C8orf79	0.0326641	0.000274392
	C8orf83	0.0367963	0.00354263
	C9	0.0314828	0.0100445
	C9orf106	0.0677217	2.21881e-05
	C9orf116	0.0292158	0.0120042
	C9orf117	-0.0794293	0.00291403
	C9orf125	0.0869752	7.39602e-07
	C9orf129	-0.0412619	0.0120042
	C9orf131	-0.158176	7.39602e-07
	C9orf144	0.0282601	0.00425642
	C9orf150	0.183301	0.000857939
	C9orf152	0.0945148	0.00860111
	C9orf156	-0.0785787	0.00291403
	C9orf16	-0.178473	0.000102805
	C9orf21	0.0641248	0.00388466
	C9orf23	-0.19377	0.00555959
	C9orf25	0.088916	0.000476325
	C9orf43	0.0271279	0.00555959
	C9orf46	-0.414812	7.39602e-07
	C9orf5	0.0866459	0.000495534
	C9orf50	0.0488682	0.000857939
	C9orf6	0.0587686	0.00451305
	C9orf78	0.17977	0.00608788
	C9orf80	-0.0525058	0.00681174
	C9orf84	0.053845	0.000898609
	C9orf9	0.0543208	4.95534e-05
	C9orf93	-0.0480216	0.00664488
	C9orf98	-0.0426146	0.00037128
	CA1	-0.0286284	0.00363662
	CA7	-0.0668711	0.00182978
	CABC1	0.0342794	7.39602e-07
	CABLES1	0.139366	0.00231643
	CABLES2	-0.0353817	0.00231643
	CABP5	-0.0574708	0.00231643
	CACNA1B	-0.0334748	0.00860111
	CACNA1C	-0.0228441	0.000857939
	CACNA1D	0.017536	0.00451305
	CACNA1G	-0.0284991	0.00181855
	CACNA1I	-0.0247567	0.00143261
	CACNA2D1	0.0374604	0.000102805
	CACNA2D3	-0.0206721	0.00607683
	CACNB1	-0.0982288	0.000996149
	CACNG2	-0.114678	3.32821e-05
	CACNG4	-0.0645232	7.17414e-05
	CACNG5	-0.0507623	0.00111458
	CADM1	0.0286678	0.00363662
	CADM3	-0.0677417	0.012094
	CADM4	-0.0433699	0.00363662
	CALB1	0.127621	0.0144925
	CALCOCO2	-0.0870064	0.00363662
	CALD1	0.0893086	3.6442e-05
	CALHM2	-0.0349609	0.0179014
	CALM2	-0.0386162	0.0101767
	CALML4	-0.0630164	0.00143261
	CALR	-0.21945	1.40524e-05
	CALU	0.0703699	0.00135067
	CAMK1D	0.0618217	1.4792e-06
	CAMK2D	0.019596	0.00291403
	CAMKK1	0.0546263	0.000122927
	CAMLG	0.0538771	0.0165278
	CAMP	-0.137435	7.39602e-07
	CAMSAP1	0.018122	0.00266869
	CAMSAP1L1	0.0737715	2.21881e-05
	CAND1	-0.112951	0.000530518
	CAPG	0.216786	0.000102805
	CAPN11	-0.0512338	1.4792e-06
	CAPN14	0.0665405	0.000656027
	CAPN2	-0.0559066	0.00681174
	CAPN3	-0.025827	7.17414e-05
	CAPN5	-0.0393716	0.000102805
	CAPN7	0.0461374	0.00291403
	CAPS	0.046799	0.000656027
	CAPZA3	-0.0556213	0.00681174
	CARD14	0.0474314	3.32821e-05
	CARD16	-0.375758	0.0144925
	CARD18	-0.199689	1.40524e-05
	CARD6	-0.459788	1.4792e-06
	CARD8	-0.0218064	0.00231643
	CARS2	0.0214719	0.000102805
	CASC4	-0.0414808	0.00451305
	CASKIN2	0.0399535	0.000218464
	CASP10	-0.207206	7.17414e-05
	CASP14	0.0456839	1.40524e-05
	CASP6	0.128835	1.40524e-05
	CASP8	-0.0961499	0.000144222
	CASP8AP2	0.101993	0.00143261
	CASP9	-0.0858375	0.00388466
	CASQ2	0.0206581	0.00608788
	CASZ1	0.0812164	7.39602e-07
	CATSPER3	0.0305743	0.00425642
	CATSPER4	0.0530689	1.40524e-05
	CATSPERB	0.0725918	7.17414e-05
	CAV1	0.0855773	5.17722e-06
	CAV2	0.100864	0.000857939
	CBFA2T2	0.0278849	0.00509828
	CBL	-0.104033	1.40524e-05
	CBLC	0.0674179	0.012094
	CBR3	-0.206001	7.39602e-07
	CBS	-0.0421846	0.0100445
	CBWD1	0.0536685	0.0144925
	CBWD3	0.171945	0.00829316
	CBWD6	0.400019	0.000495534
	CBX1	0.0230882	0.0144925
	CBX4	0.0574313	0.00681174
	CBX5	0.100907	0.00111458
	CC2D1A	0.0296988	0.00143261
	CCBP2	-0.037196	0.00231643
	CCDC104	-0.174918	0.00829316
	CCDC106	0.0848227	0.000656027
	CCDC108	-0.0341526	0.0179014
	CCDC109A	0.0803438	5.17722e-06
	CCDC11	-0.0389784	0.0100445
	CCDC112	0.0457444	0.000195533
	CCDC113	0.0217507	0.00451305
	CCDC116	-0.0656695	2.21881e-05
	CCDC12	-0.0402092	0.00111458
	CCDC121	-0.111572	0.000495534
	CCDC125	0.0402092	0.00557329
	CCDC126	0.103077	0.000590412
	CCDC127	0.0389699	0.000495534
	CCDC14	0.0598074	0.00363662
	CCDC146	0.0402995	0.00451305
	CCDC154	-0.0374997	0.00363662
	CCDC162	-0.251732	2.21881e-05
	CCDC17	0.149309	0.00555959
	CCDC18	0.0573507	0.00935935
	CCDC19	0.0909494	0.00111458
	CCDC23	-0.0671423	0.000274392
	CCDC3	0.0648806	0.00111458
	CCDC30	0.0678767	4.95534e-05
	CCDC34	0.0628591	0.00231643
	CCDC39	0.0490248	0.00451305
	CCDC45	-0.0588622	0.00363662
	CCDC46	-0.0513792	0.0101767
	CCDC47	0.0747327	0.000656027
	CCDC51	0.180488	0.00037128
	CCDC54	0.0704904	0.00182978
	CCDC57	0.0267815	4.95534e-05
	CCDC59	-0.0586434	0.0144925
	CCDC61	-0.0331145	0.0100445
	CCDC63	-0.0684636	0.0100445
	CCDC64	0.0460968	0.013003
	CCDC73	-0.0205844	0.00143261
	CCDC77	0.0346227	0.000495534
	CCDC80	0.0327803	4.95534e-05
	CCDC88A	0.0347396	0.00681174
	CCDC92	0.0314596	0.000155282
	CCDC96	0.0269772	0.00681174
	CCHCR1	-0.0375079	0.0172712
	CCL11	0.021685	0.000144222
	CCL13	0.0145199	0.00681174
	CCL16	-0.0523176	0.000201172
	CCL17	0.0315626	0.00363662
	CCL20	-0.0553971	0.00451305
	CCL21	-0.165851	0.00363662
	CCL22	0.0612739	0.012094
	CCL23	-0.0798603	1.40524e-05
	CCL24	-0.0499072	0.00291403
	CCL27	0.79564	0.000201172
	CCL7	-0.0752796	0.000102805
	CCL8	-0.0368244	0.00181855
	CCM2	-0.231844	2.95841e-06
	CCNA2	0.0819801	0.00557329
	CCNB1	0.0265591	0.012094
	CCNB1IP1	0.0762108	4.95534e-05
	CCND1	0.0621543	2.95841e-06
	CCND2	-0.0291768	0.014117
	CCNDBP1	0.0452128	0.00363662
	CCNG2	0.091109	2.21881e-05
	CCNH	0.0575055	0.00182978
	CCNJL	0.0329687	0.00037128
	CCR1	-0.0289248	0.00829316
	CCR10	-0.0681443	7.17414e-05
	CCR7	-0.022824	0.00291403
	CCRL2	-0.165691	2.95841e-06
	CCS	0.0737448	0.00829316
	CCT3	-0.0859968	0.00024544
	CCT6A	-0.0547452	0.00182978
	CCT7	-0.0481998	0.00451305
	CCT8	0.0719305	0.00293325
	CD101	0.0226043	0.0100445
	CD163	0.0486783	0.00555959
	CD164L2	-0.0585106	0.00111458
	CD1C	-0.0359925	0.00829316
	CD22	-0.037963	0.00555959
	CD247	-0.0385559	0.000138215
	CD274	-0.288776	0.000857939
	CD276	0.0426472	0.012094
	CD28	-0.0189526	0.0172712
	CD2AP	0.0239871	0.00555959
	CD2BP2	0.211155	0.000195533
	CD300C	-0.0342769	0.00200497
	CD300E	-0.0606016	0.00451305
	CD300LB	-0.0676779	0.00829316
	CD300LD	-0.0614871	0.000201172
	CD302	0.137064	0.00681174
	CD33	-0.0591474	0.000857939
	CD37	0.0618275	0.00231643
	CD38	-0.047563	0.00555959
	CD3D	-0.0369088	1.40524e-05
	CD3EAP	-0.0786671	0.00451305
	CD48	-0.144551	7.39602e-07
	CD53	-0.0553038	0.00681174
	CD58	-0.0380324	0.00111458
	CD5L	-0.0268316	0.00363662
	CD63	0.157007	0.00182978
	CD68	-0.1215	0.00555959
	CD69	0.0244837	0.0172712
	CD7	-0.0668292	0.0100445
	CD79A	-0.0733883	0.00267443
	CD81	0.0612993	0.000857939
	CD82	-0.0448786	0.00231643
	CD93	-0.0449742	0.000656027
	CDA	-0.10959	0.000857939
	CDC123	-0.0311847	0.00231643
	CDC14A	-0.0350135	0.00363662
	CDC14B	0.0802421	1.4792e-06
	CDC2	0.0685498	0.00291403
	CDC20	-0.0876743	0.00220878
	CDC40	0.0294805	0.0172712
	CDC42BPG	0.0492437	0.00363662
	CDC42EP1	-0.162431	0.00111458
	CDC42EP4	0.0842429	0.0172712
	CDC42SE1	-0.16941	0.000857939
	CDC7	0.0454607	0.00291403
	CDCA7L	0.0495649	0.000656027
	CDH1	0.0697951	0.00024544
	CDH13	0.0254366	0.00182978
	CDH15	-0.0653651	0.00143261
	CDH17	0.0235268	0.00555959
	CDH20	-0.109886	0.00182978
	CDH22	-0.0637923	0.014117
	CDH26	0.0276263	0.000495534
	CDK11A	-0.0290287	0.00231643
	CDK13	0.0581425	0.00555959
	CDK15	0.0458526	3.32821e-05
	CDK19	-0.0292047	0.012094
	CDK2	0.0410962	0.00267443
	CDK2AP2	-0.139961	0.000144222
	CDK5	0.103301	3.62999e-05
	CDK5RAP2	0.04577	0.000495534
	CDK5RAP3	-0.0671337	0.00681174
	CDK6	0.0445437	1.4792e-06
	CDKAL1	0.0431407	7.39602e-07
	CDKL3	0.0556453	0.00291403
	CDKN1A	0.0701931	3.32821e-05
	CDKN1B	-0.134134	0.00181855
	CDKN1C	-0.0345343	0.00681174
	CDON	0.0518123	0.0152694
	CDR2	0.16344	0.0100445
	CDRT4	0.0496358	0.00451305
	CEACAM16	0.034065	0.000274392
	CEACAM19	-0.0556532	0.00363662
	CEACAM21	-0.0830146	0.0172712
	CEACAM3	-0.0510695	0.00143261
	CEACAM4	-0.129827	0.000102805
	CEACAM6	-0.0643834	0.0165278
	CEBPE	-0.0632003	0.012094
	CECR5	0.0492724	0.000590412
	CEL	0.120782	0.00291403
	CELA2A	0.0189026	0.0172712
	CELSR2	0.0417846	0.0144925
	CEND1	-0.0438838	0.012094
	CENPB	0.145301	0.0172712
	CENPC1	-0.100828	0.0110395
	CENPO	-0.0425535	0.00860111
	CENPP	0.0738886	4.95534e-05
	CEP110	0.0380152	8.87523e-06
	CEP170	0.0698737	0.00037128
	CEP170L	0.0437546	0.00291403
	CEP192	-0.0492205	0.012094
	CEP68	0.0797363	0.000102805
	CEP72	0.036773	0.000219156
	CEP76	0.0534255	0.000201172
	CERKL	-0.0521288	0.00231643
	CES1	-0.101808	0.00363662
	CES2	0.107097	8.87523e-06
	CES3	-0.0649573	0.00555959
	CES7	-0.0574764	0.00451305
	CES8	0.0524017	2.21881e-05
	CFB	-0.0512311	8.87523e-06
	CFHR1	-0.0687245	0.00243142
	CFL2	0.136529	0.00037128
	CFLAR	-0.0404566	0.00425642
	CGB	-0.0686409	0.00231643
	CGB5	-0.030053	0.0172712
	CGB8	-0.0688495	0.0101767
	CGN	-0.162758	0.000274392
	CGNL1	0.0713781	7.39602e-07
	CHAC1	-0.0382913	0.00664488
	CHCHD10	-0.0493815	0.00935935
	CHCHD6	-0.0332908	0.00363662
	CHCHD7	0.040469	0.00231643
	CHD1	0.0475938	0.00143261
	CHD2	-0.15454	7.39602e-07
	CHD5	-0.0314717	0.000201172
	CHD8	0.0576228	3.6442e-05
	CHDH	0.0477775	6.75987e-05
	CHI3L1	-0.111484	0.000495534
	CHI3L2	-0.0291254	0.00363662
	CHIA	0.0611249	0.000857939
	CHID1	0.0417197	7.39602e-07
	CHKB-CPT1B	-0.0533806	0.0152028
	CHML	0.0832237	0.000857939
	CHMP4A	-0.0913039	0.000495534
	CHMP6	0.0361866	0.00860111
	CHMP7	-0.165747	7.17414e-05
	CHN2	0.0224195	0.0172712
	CHP2	0.0999948	2.21881e-05
	CHPT1	0.19093	3.6442e-05
	CHRFAM7A	0.0411046	0.00200497
	CHRM1	0.179221	7.39602e-07
	CHRM3	0.0210548	0.000654772
	CHRM4	-0.0288497	4.95534e-05
	CHRM5	0.0719292	0.00291403
	CHRNA1	0.0307791	0.00291403
	CHRNA6	-0.0698131	0.000144222
	CHRNA7	-0.0280891	0.00509828
	CHRNB3	0.0225238	0.0144925
	CHRNE	-0.105611	0.00681174
	CHST10	0.0300605	0.000381953
	CHST15	-0.0266195	0.000144222
	CHST3	-0.0574659	0.00182978
	CHST4	-0.0500058	0.0144925
	CHST6	0.0270843	0.0100445
	CHST8	-0.0416811	0.00111458
	CHST9	-0.0896352	0.000144222
	CHSY1	0.181989	4.95534e-05
	CHTF8	-0.0491019	0.000896286
	CIB1	0.0998378	0.00111458
	CIC	0.138776	0.000495534
	CIRH1A	-0.116858	0.000102805
	CISD1	0.0825357	0.000201172
	CIT	0.0926814	7.39602e-07
	CKAP2	0.0586179	0.00135067
	CKAP4	-0.0494832	0.000201172
	CKB	0.267049	2.95841e-06
	CKMT1B	0.0492279	0.000274392
	CKS2	-0.0831293	0.00363662
	CLASP1	0.0290746	0.00164818
	CLASP2	0.0384027	3.32821e-05
	CLCA1	-0.0686391	2.95841e-06
	CLCA3P	-0.0245874	0.0165514
	CLCA4	-0.0228446	0.00829316
	CLCF1	0.276448	0.00555959
	CLDN1	0.274322	0.000857939
	CLDN12	-0.124193	0.00135067
	CLDN14	0.0273975	0.00388466
	CLDN20	0.18338	4.95534e-05
	CLDN22	0.074782	0.000201172
	CLDN23	-0.0414103	0.00555959
	CLDN5	-0.0304303	0.0165514
	CLDN7	-0.095892	9.70057e-05
	CLDN9	0.0937768	0.00143261
	CLDND2	-0.0421254	0.00291403
	CLEC12A	0.0471251	3.32821e-05
	CLEC12B	0.0269032	0.00681174
	CLEC14A	-0.0632011	0.00231643
	CLEC17A	0.013342	0.012094
	CLEC18A	0.038749	0.00681174
	CLEC1A	-0.167272	0.00037128
	CLEC1B	0.0593239	0.000530518
	CLEC7A	-0.189977	1.40524e-05
	CLIP2	0.0252822	0.0120042
	CLIP4	-0.0404326	0.012094
	CLK4	-0.0516617	0.00451305
	CLLU1	-0.229211	7.39602e-07
	CLNK	-0.0272881	0.00231643
	CLP1	-0.0776581	0.0140961
	CLPB	-0.026863	0.00266869
	CLPTM1L	0.0398244	3.32821e-05
	CLPX	-0.065905	0.00789825
	CLRN1OS	-0.0440693	0.0144925
	CLRN2	-0.0155441	4.95534e-05
	CLSTN3	-0.0609519	0.00182978
	CLTB	0.144043	0.00789825
	CLU	-0.0267703	0.0144925
	CLUL1	-0.091812	0.000656553
	CMBL	-0.0366116	0.0165514
	CMIP	0.0282988	0.00363662
	CMTM1	0.0374246	0.00231643
	CMTM6	0.0222121	0.0172712
	CMYA5	0.190489	7.17414e-05
	CNBP	-0.127344	0.00037128
	CNDP2	-0.306851	0.000144222
	CNGA1	0.0451206	0.00555959
	CNGA4	0.0561844	7.39602e-07
	CNGB1	0.0568096	0.00135067
	CNIH	-0.168534	2.95841e-06
	CNIH2	-0.0398411	0.00182978
	CNIH3	-0.0711008	0.000383076
	CNKSR1	0.165515	0.00231643
	CNN3	0.0454066	0.00231643
	CNNM2	0.0285658	0.000495534
	CNNM4	0.0355839	0.00829316
	CNOT1	0.0195128	0.000656027
	CNOT2	0.0419001	0.000729531
	CNOT4	0.0557099	2.21881e-05
	CNOT6	0.0338601	0.000656027
	CNP	-0.0582506	0.00231643
	CNRIP1	0.0663486	0.00363662
	CNTLN	0.0401205	0.000144222
	CNTN1	0.0604887	0.000857939
	CNTN4	-0.0218618	0.00829316
	CNTN6	-0.0617843	0.0152916
	CNTNAP1	0.0157879	0.013003
	CNTNAP3	0.0564316	0.00291403
	CNTROB	0.0559725	0.0100445
	COASY	-0.128287	0.00231643
	COBRA1	0.0410465	0.012094
	COG7	0.303908	7.39602e-07
	COL10A1	0.0649908	8.87523e-06
	COL18A1	0.0266463	0.0120042
	COL21A1	-0.0679342	0.00354263
	COL24A1	-0.0448368	0.00681174
	COL28A1	0.0355331	0.00451305
	COL29A1	0.0363555	2.21881e-05
	COL4A3BP	-0.0346759	0.014117
	COL5A2	0.0724694	7.39602e-07
	COL5A3	-0.043608	0.0172712
	COL6A4P2	-0.0290367	0.000144222
	COL6A6	0.0214592	0.00363662
	COL7A1	0.0635927	0.00363662
	COL8A1	-0.0367992	0.00182978
	COMMD3	0.0562951	0.00681174
	COMMD4	-0.0449235	0.0144925
	COMMD8	0.167814	5.17722e-06
	COMT	0.0441878	0.000122509
	COPB2	-0.0446356	0.0152916
	COPE	-0.0633531	0.000102805
	COPG2	0.044749	0.00291403
	COPS7A	-0.0717981	0.00724728
	COPS8	-0.081536	0.0172712
	COPZ2	0.0697185	0.00143261
	COQ10B	-0.0556916	0.00829316
	CORIN	0.0337228	0.00143261
	CORO1C	0.0664525	0.000274392
	CORO2B	0.035932	0.000273817
	CORO7	0.0341722	0.012094
	COX19	-0.0316324	0.00363662
	COX4I1	0.0319644	0.00829316
	COX5B	-0.127189	0.00220878
	COX6B1	-0.0596527	0.0100445
	COX6B2	-0.0534484	0.00451305
	COX7B2	0.0115001	0.0152916
	COX8C	0.0155238	0.00557329
	CPA1	0.0717456	0.00363662
	CPA2	-0.056612	0.00829316
	CPAMD8	-0.103779	0.00231643
	CPB2	0.0389864	0.00555959
	CPEB2	0.119131	2.21881e-05
	CPEB3	0.0791609	2.95841e-06
	CPEB4	0.0430849	0.000809985
	CPLX1	-0.0718784	3.32821e-05
	CPLX2	-0.0823365	0.000729531
	CPM	0.0405217	0.00555959
	CPN2	-0.0280543	7.17414e-05
	CPNE1	-0.0257498	0.0100445
	CPNE2	-0.0453812	0.000274392
	CPNE3	0.0635921	4.95534e-05
	CPNE5	-0.0584217	7.39602e-07
	CPNE7	-0.0835658	3.6442e-05
	CPNE8	0.0502768	0.00291403
	CPNE9	0.0450076	4.67707e-05
	CPOX	0.0539246	0.00291403
	CPSF4L	0.145384	0.00143261
	CPSF7	0.0665002	0.00555959
	CPT1A	0.0311626	0.00291403
	CPT2	0.0544351	0.00200497
	CPVL	-0.0286652	0.00182978
	CPXM1	-0.10759	0.000495534
	CPXM2	-0.0365822	0.0101767
	CPZ	-0.0451321	0.00182978
	CRABP1	-0.0443594	0.00681174
	CRABP2	-0.0721315	0.00291403
	CRADD	0.0413947	0.00363662
	CRAMP1L	0.0332911	4.95534e-05
	CREB3	-0.33735	0.0100445
	CREBBP	0.0192942	0.000857939
	CREM	0.0296627	0.00681174
	CRHR1	-0.0723217	0.012094
	CRIM1	0.0559091	0.000427332
	CRIP1	0.228984	0.00451305
	CRISP1	0.0493957	0.0013474
	CRISPLD1	0.0661694	0.00555959
	CRK	0.0514909	0.00425642
	CRLF3	-0.153695	0.000656027
	CRLS1	0.0671716	0.000174318
	CRNKL1	0.0364806	0.00829316
	CROCCL1	0.0248746	0.00363662
	CRTAM	-0.0334388	0.012094
	CRTC2	-0.0856772	0.00829316
	CRY2	0.103093	0.00111458
	CRYAA	-0.0344967	0.0100445
	CRYAB	0.271461	0.00111458
	CRYBB1	-0.0457932	7.39602e-07
	CRYGC	0.0372798	5.17722e-06
	CRYGS	0.045625	5.17722e-06
	CRYL1	-0.0674927	4.62396e-05
	CS	0.0545829	0.00363662
	CSF1R	0.0523421	0.000274392
	CSF3	-0.250322	7.39602e-07
	CSGALNACT1	-0.0332818	0.00723463
	CSGALNACT2	-0.0585379	9.70057e-05
	CSH1	-0.0235579	0.012094
	CSH2	0.0269875	0.012094
	CSK	0.04204	3.32821e-05
	CSN1S1	0.0363832	0.000857939
	CSNK1A1	-0.0632624	0.000201172
	CSNK1D	0.0267391	0.00231643
	CSNK1E	0.115808	0.00149261
	CSNK2A1	0.0326402	0.00555959
	CSNK2A1P	-0.0138346	0.000144222
	CSNK2A2	0.0391478	0.00110341
	CSPG4	0.0573153	7.39602e-07
	CSRNP3	0.0933979	5.17722e-06
	CSRP1	-0.123571	0.000857939
	CSRP2BP	0.0700484	2.95841e-06
	CST11	-0.054604	0.000656027
	CST3	-0.0217859	0.0165514
	CST4	-0.0615028	0.00037128
	CST5	-0.0768339	8.87523e-06
	CST7	-0.0672626	0.00829316
	CSTB	0.0515928	0.00143261
	CSTF2T	0.135429	0.0130228
	CSTT	-0.0198394	0.00149261
	CTBP1	0.0562432	0.00555959
	CTCF	0.0259048	0.0144925
	CTCFL	-0.048362	7.39602e-07
	CTDP1	0.018008	0.000898609
	CTDSP1	0.10261	5.17722e-06
	CTDSPL	0.0381948	0.00681174
	CTDSPL2	0.073516	0.000495534
	CTF1	0.051235	0.0172712
	CTGF	0.199809	0.00829316
	CTHRC1	-0.0889279	3.32821e-05
	CTNNAL1	0.11738	2.95841e-06
	CTNNBIP1	0.161632	7.39602e-07
	CTNS	-0.0607454	0.000857939
	CTRB1	-0.0191761	0.0179014
	CTRC	-0.096183	7.39602e-07
	CTRL	-0.0307087	0.00829316
	CTSB	-0.235606	2.95841e-06
	CTSD	0.1691	0.00266869
	CTSE	-0.0111681	0.00111458
	CTSG	-0.105596	1.40524e-05
	CTSH	0.0876972	0.00231643
	CTSL1	0.0347951	0.00164818
	CTTN	0.0270956	0.00231643
	CTTNBP2	-0.0465278	0.000857939
	CTTNBP2NL	0.045537	2.21881e-05
	CTU1	0.0331338	0.00425642
	CTXN3	0.0619121	7.17414e-05
	CUGBP1	0.0613618	5.17722e-06
	CUL3	0.0607194	0.00243142
	CUL4A	0.032605	3.32821e-05
	CUL9	-0.0528056	0.000274392
	CUZD1	-0.0649133	9.70057e-05
	CWF19L2	-0.0660274	0.00143261
	CX3CL1	0.0438664	0.0144925
	CXADRP2	-0.0998635	0.012094
	CXCL10	-0.0558319	0.0100445
	CXCL13	0.0465502	0.00149261
	CXCL14	0.439468	0.00143261
	CXCL17	-0.177018	7.39602e-07
	CXCR4	-0.0518201	0.00293945
	CXCR5	-0.0330397	7.17414e-05
	CXCR7	0.168424	1.40524e-05
	CYB561D1	0.080954	0.00291403
	CYB5R2	-0.0305042	0.0172712
	CYB5R3	0.180305	7.39602e-07
	CYBA	-0.0574536	0.0172712
	CYBASC3	0.161755	5.17722e-06
	CYCS	-0.100829	0.0100445
	CYCSP52	0.0243602	0.0120042
	CYLC2	-0.0963569	0.0172712
	CYLD	0.12062	2.21881e-05
	CYP1A2	0.0652735	7.39602e-07
	CYP21A2	-0.0645213	0.000495534
	CYP27A1	0.0941284	0.0172712
	CYP27B1	-0.0414373	0.0165514
	CYP27C1	0.020909	0.00829316
	CYP2A13	-0.0592739	0.00231643
	CYP2A6	-0.0587	0.000274392
	CYP2D6	-0.0366804	0.0172712
	CYP2D7P1	-0.0448123	0.00860111
	CYP2S1	-0.324053	7.60336e-05
	CYP3A4	0.321782	1.4792e-06
	CYP3A5	0.215769	0.00555959
	CYP4B1	0.154023	0.000155282
	CYP4F12	0.0686092	0.00681174
	CYP4F8	-0.0575976	0.0179014
	CYP4Z2P	-0.159456	4.67707e-05
	CYP7B1	0.138719	0.00363662
	CYP8B1	-0.0377698	0.00135067
	CYTH2	0.0713137	0.00231643
	CYTH3	0.0334683	0.00135067
	CYTH4	-0.156255	4.95534e-05
	DAAM1	0.0859278	3.32821e-05
	DACT3	-0.0362446	0.00829316
	DAD1L	0.0281186	0.00143261
	DALRD3	-0.135402	0.000274392
	DAP	0.0871293	8.87523e-06
	DAPK2	0.0424769	0.00829316
	DARC	-0.0256507	0.00681174
	DARS2	0.0611377	7.17414e-05
	DAXX	-0.106612	0.0172712
	DBF4	-0.248636	0.000155282
	DBI	-0.0475263	0.000857939
	DBNDD2	0.0397701	0.00829316
	DCAF10	0.0651839	0.000857939
	DCAF13	-0.0725187	0.0144925
	DCAF4	-0.0582103	0.0144925
	DCD	-0.0622378	0.000495534
	DCDC1	-0.0735163	0.000656027
	DCDC2	0.0387304	0.00829316
	DCI	-0.0463131	0.000590412
	DCK	0.0889545	0.0144925
	DCLK2	-0.0502486	0.00182978
	DCLRE1C	0.0506265	0.00363662
	DCPS	-0.0485973	0.00231643
	DCST2	0.542084	0.000102805
	DCTN1	0.0819933	1.4792e-06
	DCTN2	-0.0311216	0.00829316
	DCTN3	-0.10854	0.00506946
	DCTN4	-0.0630147	0.0100445
	DDA1	0.0658423	0.00231643
	DDAH2	0.128213	0.0172712
	DDHD1	0.0254057	0.0144925
	DDIT4	0.244138	4.65931e-05
	DDR1	0.0583474	7.17414e-05
	DDR2	0.0523666	5.17722e-06
	DDX10	0.0369041	0.00037128
	DDX19B	-0.0326857	0.0100445
	DDX27	-0.0553165	0.00829316
	DDX41	0.0426385	0.0110395
	DDX46	0.0374926	0.000476325
	DDX47	-0.111275	0.000495534
	DDX49	-0.0723786	0.00451305
	DDX5	-0.106881	0.000307114
	DDX50	0.0441525	0.00291403
	DDX58	0.0543521	0.00555959
	DDX59	0.097434	3.32821e-05
	DDX6	-0.066939	0.00231643
	DDX60	-0.0105374	0.0172712
	DEAF1	0.0171523	0.0172712
	DECR1	-0.105359	0.00291403
	DEFB1	0.0984205	4.95534e-05
	DEFB105B	-0.0190068	0.00182978
	DEFB107A	-0.0405069	0.00293945
	DEFB108B	0.0150034	0.0130228
	DEFB118	-0.0538784	0.000857939
	DEFB121	-0.0781619	0.011057
	DEFB126	-0.206427	0.000102805
	DEFB133	0.0426924	0.00291403
	DEFB135	-0.152259	7.39602e-07
	DEFB136	0.0465419	0.00143261
	DEK	-0.0599271	3.32821e-05
	DENND1A	0.0210878	0.00182978
	DENND2A	-0.0512557	0.00354263
	DENND2D	-0.136537	0.00291403
	DENND4B	0.0170118	0.00681174
	DENND4C	0.230585	7.39602e-07
	DENND5A	-0.0528652	0.00231643
	DENND5B	0.0468756	0.000201172
	DEPDC1	0.0867909	0.00037128
	DEPDC4	0.098947	0.000729531
	DEPDC5	0.0666753	4.95534e-05
	DEXI	0.0624244	0.0172712
	DGCR14	0.0668806	2.95841e-06
	DGCR6L	0.0510159	0.0172712
	DGCR8	0.0255512	0.00555959
	DGKD	0.0309037	0.00122127
	DHCR24	-0.051377	0.00037128
	DHDDS	0.080202	0.00231643
	DHDH	-0.0867622	0.0100445
	DHFR	-0.0464356	0.00182978
	DHODH	-0.120393	0.000144222
	DHRS12	-0.0377585	0.00111458
	DHRS13	-0.194259	3.32821e-05
	DHRS7B	0.0660004	0.000729531
	DHRS9	0.0457373	2.95841e-06
	DHX30	-0.0219616	0.014117
	DHX32	0.01868	0.00111458
	DHX34	-0.073327	0.0100445
	DHX40P	-0.084324	4.95534e-05
	DHX57	-0.0531524	0.00363662
	DHX9	-0.171958	5.17722e-06
	DIAPH3	0.0169378	0.00181436
	DIP2B	0.123051	0.000201172
	DIP2C	0.0237134	0.00555959
	DIRC2	0.0456771	0.00164818
	DIS3L2	-0.0275869	0.00220878
	DISC1	0.0392759	2.21881e-05
	DISC2	0.0729806	0.000857939
	DIXDC1	0.0559672	1.40524e-05
	DKFZP586I1420	0.0776322	0.00143261
	DKFZp434J0226	-0.118118	2.95841e-06
	DKFZp434L192	-0.131031	0.000495534
	DKK1	0.190844	0.00681174
	DLEU2	-0.119282	0.0144925
	DLEU7	0.0555759	0.00724728
	DLG1	-0.0669107	0.000656027
	DLG5	0.0540924	0.000656027
	DLGAP3	-0.0244227	0.00363662
	DLGAP4	0.0219926	0.00200497
	DLL1	0.0454315	0.00829316
	DLX2	-0.215089	2.95841e-06
	DMAP1	-0.155841	7.39602e-07
	DMBT1	-0.0394968	7.39602e-07
	DMBX1	-0.190655	0.00037128
	DMC1	0.0911565	0.0172712
	DMXL1	0.0452851	0.000857939
	DNAH10	0.0237009	0.00024544
	DNAH14	0.0732368	0.0144925
	DNAH17	-0.0181475	0.00363662
	DNAH7	0.0438818	0.000656027
	DNAH8	0.0601048	0.000495534
	DNAI2	-0.0215774	0.00829316
	DNAJB11	0.0404216	0.00231643
	DNAJB2	0.0958523	0.000102805
	DNAJB7	0.0800434	7.17414e-05
	DNAJC12	0.0387123	1.4792e-06
	DNAJC13	0.0291362	0.00451305
	DNAJC16	-0.0319985	0.0101767
	DNAJC28	-0.0423649	0.0172712
	DNAJC3	0.0614275	0.00829316
	DNAJC4	0.204328	0.000102805
	DNAJC5B	0.147174	4.95534e-05
	DNAJC6	0.0367626	0.00451305
	DNAJC9	-0.11299	0.00182978
	DNASE2	-0.136859	1.40524e-05
	DNER	-0.0274807	0.00829316
	DNM1L	0.0454492	0.00231643
	DNM1P35	-0.0382011	0.00681174
	DNM3	0.0319101	8.87523e-06
	DNMT3A	0.0383972	0.00451305
	DNMT3B	-0.0285505	0.00681174
	DNTT	0.0493706	0.00037128
	DNTTIP1	-0.0221727	0.00555959
	DOC2A	-0.108002	5.17722e-06
	DOCK1	0.0256355	2.21881e-05
	DOCK10	0.0318274	0.000144222
	DOCK7	0.0330722	0.000495534
	DOCK9	0.0373471	0.0172712
	DOK2	-0.0701152	5.98359e-05
	DOLK	-0.129102	0.0172712
	DOPEY2	0.0430515	0.00664488
	DPEP2	-0.0877393	1.4792e-06
	DPF1	-0.0831785	0.00037128
	DPF2	0.0455397	0.00555959
	DPH2	-0.0508844	0.00555959
	DPH3B	-0.0563701	0.00291403
	DPP3	-0.0579541	3.32821e-05
	DPP4	-0.0465205	0.00664488
	DPP7	-0.0626487	0.00111458
	DPRX	0.0151895	0.000243913
	DPY19L2	0.103676	0.000495534
	DPY19L4	0.040128	0.014117
	DPYD	0.0755446	0.000155282
	DPYSL4	-0.0429632	0.000857939
	DQX1	-0.104086	0.00322822
	DR1	0.0788515	0.00787121
	DRAM1	0.0506521	0.000857939
	DRAM2	-0.0811069	2.21881e-05
	DSC1	0.367981	0.00829316
	DSCAML1	-0.0241597	0.00110065
	DSG1	0.308488	0.000144222
	DSG3	0.108119	5.17722e-06
	DSG4	0.0588843	0.00111458
	DST	0.0778147	1.4792e-06
	DTHD1	0.0982985	0.0144925
	DTL	0.0487478	1.40524e-05
	DTNA	-0.041557	0.00143261
	DTNBP1	0.0180947	0.00608788
	DTWD1	0.0791601	0.000144222
	DTWD2	0.033816	0.00200497
	DTX1	-0.0416513	0.00231643
	DTX2	-0.0547636	0.0101767
	DTX3L	-0.0555473	0.0172712
	DUOX2	-0.0440727	0.00291403
	DUPD1	0.0977665	8.87523e-06
	DUS1L	-0.0538083	0.00557329
	DUS4L	0.108041	0.000201172
	DUSP1	0.35832	0.000656027
	DUSP4	-0.0489115	0.00037128
	DUSP6	-0.148437	3.6442e-05
	DUSP8	0.0606836	0.00354263
	DUT	-0.139873	1.4792e-06
	DVL2	-0.0383256	0.00143261
	DVL3	-0.0385687	0.00608788
	DYNC1H1	0.0264256	2.21881e-05
	DYNC1I2	-0.0411317	0.0144925
	DYNLRB2	0.0349851	0.00143261
	DYRK1A	0.0423067	0.012094
	DYRK2	0.0240365	0.00608788
	DYRK3	-0.14647	0.000729531
	DYTN	0.0442668	0.000857939
	DYX1C1	0.0376008	0.00182978
	DZIP1L	0.0884422	2.21881e-05
	E2F2	0.0919831	0.000155282
	E2F4	-0.0449346	0.0100445
	E2F5	0.036984	0.000427332
	E2F8	-0.119074	0.00037128
	EAF1	-0.302934	4.95534e-05
	EAF2	-0.0163205	0.00292089
	EARS2	-0.0830885	0.00037128
	EBAG9	0.0832118	0.000476325
	EBI3	-0.15017	1.40524e-05
	EBNA1BP2	-0.0483764	0.00555959
	EBPL	-0.0652042	0.000656027
	ECE1	0.0550911	0.000495534
	ECEL1P2	0.464492	1.40524e-05
	ECHDC1	0.0848778	2.21881e-05
	ECHDC2	-0.0324403	0.00555959
	ECSCR	0.01858	0.0100445
	ECSIT	-0.0610677	0.00664488
	ECT2L	0.0533654	0.00829316
	EDEM1	-0.190381	7.39602e-07
	EDEM2	-0.0498367	0.0152694
	EDEM3	0.0814957	2.21881e-05
	EDF1	0.0443587	0.000656027
	EDIL3	0.033923	0.00243142
	EDN3	0.0679555	0.012094
	EDNRA	-0.0545817	0.011057
	EEF1AL7	0.0554781	0.000495534
	EEF1B2	-0.211609	1.4792e-06
	EEF2	-0.0808342	3.32821e-05
	EEFSEC	0.0415646	3.6442e-05
	EEPD1	0.044606	5.98359e-05
	EFCAB10	-0.0376023	0.00509828
	EFCAB2	-0.0524849	0.00111458
	EFCAB3	-0.0799691	0.000656027
	EFCAB4A	-0.0852282	0.00291403
	EFCAB4B	-0.0425837	0.00182978
	EFCAB7	0.0320799	0.0100445
	EFCAB8	0.11132	0.0172712
	EFEMP1	0.0789617	0.00363662
	EFEMP2	-0.0405243	0.00681174
	EFHA1	0.0620396	0.000274392
	EFHC1	0.0452655	0.00291403
	EFHD2	-0.0826222	0.000144222
	EFNA1	0.149963	0.00037128
	EFNA2	-0.0765359	0.00291403
	EFNA5	0.0267721	0.00860111
	EFNB2	0.0507846	0.00231643
	EFR3B	-0.0427663	7.17414e-05
	EFS	0.269898	5.96149e-05
	EFTUD1	-0.108387	1.4792e-06
	EGF	0.0701933	0.000588785
	EGFLAM	-0.0700729	0.000656027
	EGFR	0.0412971	0.000201172
	EGLN1	0.036534	0.0165514
	EGLN3	0.0905351	0.000144222
	EHBP1	0.025372	0.00451305
	EHBP1L1	0.0558363	0.0172712
	EHD4	-0.036539	0.000274392
	EHF	-0.122956	0.0144925
	EHMT1	0.0172733	0.00723463
	EHMT2	0.015689	0.00243142
	EID2B	-0.115123	0.000381953
	EIF2AK4	0.0527311	0.00037128
	EIF2B3	0.0915668	0.000383076
	EIF2C1	0.0390611	0.000495534
	EIF2C2	0.0325733	0.00143261
	EIF2C4	0.14667	0.000495534
	EIF2S2	-0.127882	1.4792e-06
	EIF3C	0.0554386	0.0144925
	EIF3H	0.0366144	0.000383076
	EIF3M	0.0222414	0.0100445
	EIF4A1	-0.108806	7.39602e-07
	EIF4A2	-0.232066	0.000137752
	EIF4EBP1	-0.0540997	0.00231643
	EIF4G3	0.0381014	0.000857939
	EIF5A	-0.0811343	0.014117
	ELAC1	0.0302067	0.000495534
	ELANE	-0.0759462	0.00681174
	ELF1	0.101999	0.00291403
	ELK3	-0.039863	0.00363662
	ELL	-0.0567411	0.000590412
	ELL2	0.0395122	7.17414e-05
	ELMO2	0.0741047	0.000656027
	ELMO3	0.123258	8.87523e-06
	ELMOD3	-0.107899	0.00143261
	ELN	0.122136	0.000144222
	ELOF1	-0.0751495	3.32821e-05
	ELOVL4	-0.0594842	0.00291403
	ELOVL5	0.0415087	0.014117
	ELOVL6	-0.0462032	0.00143261
	ELP2P	0.118316	0.00241552
	ELP4	0.105283	0.000274392
	EMB	0.0610109	1.40524e-05
	EME2	0.0361591	0.00829316
	EMG1	-0.382321	7.39602e-07
	EML1	0.0348606	0.000174318
	EML2	-0.0456271	0.00681174
	EML4	0.0472293	0.000201172
	EML5	0.0595524	0.00555959
	EML6	-0.0885439	7.39602e-07
	EMP1	0.0971056	0.012094
	EMP2	0.0309731	0.012094
	EMP3	-0.11135	7.17414e-05
	EMR2	-0.0932164	0.00291403
	EMR3	-0.0941673	9.70057e-05
	EMX1	-0.20997	0.00111458
	EMX2	-0.0635487	0.00509828
	EMX2OS	-0.0453604	0.00231643
	ENAH	0.0512632	5.98359e-05
	ENAM	-0.0190218	0.00352106
	ENDOD1	0.0511094	0.00220878
	ENGASE	0.029215	0.000857939
	ENHO	-0.0551227	0.0100445
	ENO1	-0.155597	7.17414e-05
	ENOSF1	-0.139293	0.0172712
	ENOX1	0.0327349	4.95534e-05
	ENTHD1	-0.0201633	0.00231643
	ENTPD5	0.0319235	0.012094
	ENTPD6	-0.106962	0.000122927
	EP300	0.0359415	0.00424808
	EP400	0.0255139	0.000898609
	EP400NL	0.0328574	7.17414e-05
	EPB41	0.0394873	0.000102805
	EPB41L2	0.0325542	0.000857939
	EPB41L4A	0.030897	0.00143261
	EPB41L4B	0.174588	1.4792e-06
	EPB42	0.0451809	5.17722e-06
	EPB49	0.142318	5.17722e-06
	EPC1	0.12753	7.39602e-07
	EPC2	0.0271535	0.0129833
	EPHA2	0.0849096	1.40524e-05
	EPHA6	0.0275719	0.00829316
	EPHA8	-0.034419	0.0172712
	EPHB2	0.0191402	0.00555959
	EPHB6	0.0950566	7.39602e-07
	EPN1	0.0218222	0.0165514
	EPN2	0.0313873	0.00363662
	EPOR	0.180722	0.000201172
	EPPK1	0.0159654	0.0101767
	EPS8L3	-0.0228815	7.17414e-05
	EPYC	0.173788	1.4792e-06
	ERAP1	0.0385927	0.00724728
	ERAP2	0.0476125	8.57657e-05
	ERBB2IP	0.051194	0.00024544
	ERBB3	0.096285	2.95841e-06
	ERBB4	-0.0368987	0.000996149
	ERC1	0.0361802	0.00231643
	ERCC4	-0.15417	1.4792e-06
	ERCC8	-0.0450805	0.012094
	EREG	-0.093681	0.00164818
	ERG	0.0263264	0.00724728
	ERGIC1	0.0152733	0.00451305
	ERGIC2	0.078974	8.87523e-06
	ERICH1	0.0259658	0.000495534
	ERMAP	0.0286597	0.00322155
	ERMP1	0.100889	0.00037128
	ERP27	-0.0557399	0.000102805
	ERP44	0.0288874	0.00143261
	ERRFI1	0.104139	0.00363662
	ESCO2	0.0407194	0.00143261
	ESF1	-0.116328	0.00149261
	ESPL1	-0.0594324	0.000274392
	ESPN	-0.0884066	0.000144222
	ESPNL	-0.0398968	0.00111458
	ESR1	0.0347589	0.00466016
	ESRP1	0.0739477	0.000144222
	ESRP2	0.220908	0.00111458
	ESRRA	0.110022	2.95841e-06
	ESYT2	0.0433947	0.00164818
	ETAA1	-0.0793067	0.00182978
	ETF1	-0.054006	0.00182978
	ETFA	0.0730836	4.95534e-05
	ETHE1	0.0645648	2.21881e-05
	ETS2	-0.11611	8.87523e-06
	ETV2	-0.125131	0.000201172
	ETV3	0.0501764	0.000476325
	ETV3L	-0.0308083	8.60708e-05
	ETV4	-0.106142	0.000656027
	ETV6	-0.0286515	0.00291403
	EVPL	-0.0673607	2.21881e-05
	EVPLL	0.0473303	0.00363662
	EXD1	0.0362541	0.00555959
	EXD2	0.0112132	0.011057
	EXOC2	0.0361064	4.95534e-05
	EXOC3L2	0.0413665	0.0172712
	EXOC4	0.0456177	0.000476325
	EXOC5	0.0602897	7.17414e-05
	EXOC6	0.035704	0.00110341
	EXOC6B	0.0579001	5.98359e-05
	EXOSC1	0.0478244	0.011057
	EXOSC3	0.0581048	0.0172712
	EXOSC7	0.0993783	0.0172712
	EXOSC8	0.0421314	0.012094
	EXPH5	0.170448	0.00829316
	EXT1	0.0633827	2.95841e-06
	EXT2	0.0415781	0.000495534
	EXTL2	0.041601	0.00829316
	EZH1	0.0509119	0.0100445
	EZH2	0.039589	0.00143261
	F11R	-0.355599	7.39602e-07
	F12	0.0345285	0.000201172
	F13A1	-0.0351831	0.00555959
	F2R	0.0419216	0.000476325
	FA2H	-0.0210297	0.0164808
	FABP12	0.122841	4.95534e-05
	FABP3	0.150633	0.00829316
	FABP5	-0.165231	0.000857939
	FABP6	-0.0779307	7.39602e-07
	FABP9	0.0281046	0.00555959
	FAHD1	0.182867	0.00291403
	FAHD2A	-0.0470609	0.00363662
	FAIM	0.0734015	0.000201172
	FAM100B	-0.0611978	0.00451305
	FAM102A	-0.138038	0.00037128
	FAM102B	-0.0423959	0.00681174
	FAM105B	0.141862	0.000857939
	FAM106A	-0.0674801	0.000144222
	FAM107B	-0.0393453	0.000857939
	FAM108B1	0.0558864	4.95534e-05
	FAM10A4	0.0648601	5.17722e-06
	FAM110C	-0.164854	0.0144925
	FAM113B	-0.0170497	0.0130228
	FAM114A1	0.0267287	0.012094
	FAM117A	0.143675	0.000274392
	FAM117B	0.0846346	0.00555959
	FAM118B	0.0427411	0.000343134
	FAM125B	0.0343433	0.000896286
	FAM128B	-0.0293941	0.0172712
	FAM129A	-0.0338308	0.00037128
	FAM129B	-0.0274443	0.0144925
	FAM129C	-0.046104	0.0172712
	FAM131A	0.189823	8.87523e-06
	FAM133B	0.0498453	0.00354263
	FAM134B	0.11452	0.00829316
	FAM135A	0.0332422	0.00363662
	FAM138D	0.0727064	0.00681174
	FAM13AOS	0.0307399	0.00182978
	FAM13C	0.0408593	2.21881e-05
	FAM149B1	0.0612896	0.000144222
	FAM153A	0.104222	0.00291403
	FAM153B	-0.0726459	2.95841e-06
	FAM159B	0.0250623	0.012094
	FAM160A2	-0.0508971	0.00555959
	FAM160B1	-0.0630756	0.00143261
	FAM161B	0.0500589	0.00111458
	FAM162A	-0.216351	0.000195533
	FAM163B	-0.0509623	0.0120042
	FAM166B	0.132622	0.012094
	FAM168A	0.0467784	0.00037128
	FAM168B	0.0554158	8.87523e-06
	FAM169B	0.0282484	0.00291403
	FAM170B	0.0288641	0.00182978
	FAM171B	0.0636512	7.17414e-05
	FAM175A	0.0549715	0.000274392
	FAM175B	0.068427	0.000102805
	FAM176B	-0.122364	0.00363662
	FAM177A1	0.104697	0.000307114
	FAM177B	-0.0505427	0.00829316
	FAM178B	0.0304443	0.000656027
	FAM179A	0.315734	7.17414e-05
	FAM180A	0.0905308	0.000656027
	FAM182B	-0.0471423	0.0172712
	FAM184A	0.0391142	2.21881e-05
	FAM185A	-0.0860465	0.00231643
	FAM186A	0.0410865	0.00681174
	FAM189A1	-0.0221683	0.013003
	FAM189A2	0.114177	0.0100445
	FAM18A	0.0631764	0.00363662
	FAM190A	0.029475	0.00291403
	FAM193B	-0.099447	0.00143261
	FAM195B	0.254526	0.000122927
	FAM196B	-0.0303011	0.00681174
	FAM198A	-0.041961	0.00681174
	FAM19A3	0.0844472	0.00037128
	FAM20A	-0.0855245	0.0100445
	FAM21B	0.0757637	0.00182978
	FAM22A	-0.0386741	0.00363662
	FAM22G	-0.0511493	0.0172712
	FAM24B	0.0476427	0.00182978
	FAM25A	-0.233925	2.21881e-05
	FAM26E	-0.0661464	2.21881e-05
	FAM27L	-0.0534513	0.00143261
	FAM36A	-0.093114	0.00135067
	FAM3D	-0.0304794	0.00509828
	FAM45B	-0.116924	0.000495534
	FAM46B	0.103202	0.000174318
	FAM49A	-0.0288635	0.00557329
	FAM50B	-0.141751	0.00143261
	FAM53A	0.0438125	0.000102805
	FAM53B	-0.0675273	0.00143261
	FAM55B	-0.0642353	0.00291403
	FAM58B	-0.0221856	0.000857939
	FAM59B	-0.141781	0.0144925
	FAM60A	0.0807771	0.00293945
	FAM63A	0.0588543	0.00829316
	FAM65A	0.0614381	0.00555959
	FAM65C	0.0575448	3.32821e-05
	FAM66A	-0.025211	0.00829316
	FAM66B	-0.0370258	0.000656027
	FAM66D	-0.0975307	4.95534e-05
	FAM69B	-0.11198	0.00451305
	FAM71A	0.0263882	0.00509828
	FAM71D	0.0317164	0.00231643
	FAM71F1	-0.0527242	3.32821e-05
	FAM72A	0.0623566	0.00231643
	FAM73A	0.109618	2.95841e-06
	FAM74A3	-0.0588129	0.00681174
	FAM82A1	0.0643055	4.67707e-05
	FAM82B	0.0469313	0.00681174
	FAM83A	0.0302935	0.00829316
[truncated: 4,589 more rows]

## Sheet: DMEGs
DEMGs based on GSE53431 and GSE63315	Hyper_down	Hypo_up
	TNNI2	Gcom1
	KRT77	FCAMR
	IGFBP5	FLJ43950
	ADRB2	CPZ
	PCDH21	VOPP1
	ZNF559	PSMC5
	CSPG4	PAH
	CGNL1	IL12RB1
	GPC2	TM4SF19
	CCL27	PSMB4
	ZNF83	PGLYRP3
	SSPN	RPL41
	APOD	ANAPC11
	TTC38	SNORA31
	PDGFC	TRAF3IP2
	CRY2	PPM1G
	FAM179A	STATH
	CMYA5	ATG4B
	LAMB4	FBLIM1
	ABI3BP	TRAT1
	GATA3	RPS3
	ACACB	STK16
	GJB4	DECR1
	BOC	LOC728190
	PELI2	MAPKAPK2
	NCRNA00085	HADH
	C6orf26	CD300LD
	ARHGEF10	ATF7IP
	KRT15	HNRNPUL1
	RHOBTB3	IL23A
	CRIP1	PLEKHA2
	LONRF1	PKMYT1
	CHP2	RPL27A
	HMGCS2	CD38
	LRP4	RPL32
	ZBTB20	EPHA8
	ZBTB16	FOLH1
	STXBP6	FKBP2
	TTC14	ERCC8
	SYT8	COMMD4
	DZIP1L	WIPF1
	PHYHIP	CACNG4
	NPHP3	RWDD1
	ACSS1	STRN4
	BMP2	GUCY2E
	GJC2	FABP6
	CABC1	MRPL27
	CXCR7	IDH3B
	SMCR5	NOX4
	RDH5	RASGRP2
	DLL1	ATF4
	ZNF273	ATG4D
	TGFBR3	TPT1
	ATG16L2	FEZ2
	ZNF418	PLAUR
	SIK1	RPS12
	FAM134B	CASP9
	ACCS	CTNS
	IL2RB	TNFRSF4
	UST	GCOM1
	TEF	CENPO
	CADM1	APOL1
	PHYHD1	KRTAP4-12
	AQP9	B2M
	CRYAB	XKR8
	PIK3C2G	SPINT2
	PDK4	CASC4
	C11orf80	C20orf199
	BBS2	TREM2
	C14orf28	CSRP1
	TGFBI	COASY
	ASPA	TNFRSF10B
	RNF165	NOP56
	DENND4C	CCDC104
	GOLGA8A	PSMD8
	C10orf140	ST5
	COL7A1	VAMP3
	C7orf63	NEDD8
	IL20RA	RND1
	ZNF91	ST6GALNAC1
	FGF11	NDUFS8
	CYP4F12	ADAMTS5
	GNRH1	C7orf70
	EFEMP1	SLC22A4
	PRKCA	IMPDH1
	ZNF256	ALKBH1
	C22orf32	RAB27A
	LASS6	TMEM37
	CDR2	NFKBIZ
	RAI14	SLC3A2
	HSD17B13	TADA3
	EIF2AK4	PTPN22
	PION	JTB
	PLD6	POLR2G
	SLC27A3	IWS1
	UCN2	E2F8
	CYP3A5	ARHGDIA
	C1orf21	TRAF6
	2022-03-06	TRIOBP
	ZNF211	SH2D2A
	C5	TBC1D10B
	TRIM2	YES1
	C9orf152	MYO1C
	ANKRD50	KCNJ15
	SLC22A5	SRI
	GPT	CXCL17
	OLFML2A	PIM3
	C2orf64	PHC3
	CRYGS	E2F4
	LGALS3	PANK2
	PPFIBP1	RPS15A
	MEF2D	DLEU2
	USP49	DAXX
	CCND1	SLC2A9
	EPB49	SMC3
	KAT2A	BUB3
	DIP2C	RAC1
	WDSUB1	PLIN2
	THBS3	HMGXB4
	TMEM55A	DCTN3
	FREQ	RUNX1
	EXPH5	NDUFC1
	TRPV6	MPV17L
	RGMB	PLTP
	CKB	NSF
	ZNF260	ZBTB17
	NHLH2	CIRH1A
	USP13	FAM129B
	OLFML1	CBL
	IGSF9	PSMB1
	FOS	STAU1
	CXCL14	COQ10B
	CPNE8	BCL10
	NUPR1	TWF2
	SELENBP1	OSM
	VPS36	KCNK5
	P2RX7	C9orf23
	GPC1	MESDC1
	DOCK1	C19orf50
	PBX3	ARHGAP25
	FOXQ1	TMEM109
	CSF1R	ACTR10
	EFNB2	CD82
	FAM13AOS	NUBP1
	KLK1	C1S
	DYNLRB2	BCKDK
	TRIM66	GPR4
	NME3	IFI35
	LMOD3	MCFD2
	IL28RA	DPH2
	HDAC11	PSMB8
	TRPC6	SRP72
	TJAP1	AP3S2
	XYLT2	ADAR
	C14orf80	ATPAF2
	MATN2	DEK
	NYNRIN	MPZL3
	SCUBE2	NIPSNAP3A
	GLS	PIP5KL1
	RHOC	MED25
	PDK2	CXCR4
	CDRT4	DVL3
	C10orf104	GNLY
	AACS	SNHG7
	RORC	LOC100128191
	DLG5	HNRNPA1
	GABBR1	ABHD4
	AHI1	FBXW11
	TULP3	MAP1LC3B
	POU2F1	PATE3
	RHBDL1	ZNF174
	NAB1	ABCF2
	TIGD7	SLC25A3
	SH3YL1	TUBB2C
	MYOM1	NDUFS5
	CCDC14	APOL3
	NR3C2	PTPRB
	CTNNBIP1	ATP1B3
	SLC25A27	COPB2
	FGGY	SHC1
	TDRD1	SLC25A11
	ANKRD37	KIAA1274
	ZNF358	THUMPD3
	CLDN1	PXMP3
	TRIM52	SERAC1
	C5orf53	SLC43A2
	RALGPS1	DDX19B
	WDR27	TBRG4
	ZSWIM5	PSAT1
	RUNDC2C	SIAH1
	C1GALT1	MTRR
	CCDC3	EAF2
	FOXO1	TPRKB
	ZFP112	TMEM204
	RAGE	TXNDC11
	LOC143666	C6orf150
	SLC6A16	FAM129A
	SPTAN1	RELL2
	POU6F1	RNASEK
	MED13L	TMEM188
	PDZD2	SHISA5
	AXL	DUS1L
	LYPD6B	PRR11
	OSBPL8	C20orf54
	LDLRAD3	FAM86C
	FAM117A	CNBP
	GARNL3	GOSR2
	CABLES1	PLSCR1
	FAM175A	NPC1
	IL11RA	CHAC1
	CCDC77	NXT1
	MFSD11	GSTA4
	FLJ10213	C1orf144
	CAPS	TUBA3D
	C10orf116	TCEB1
	ITCH	MLKL
	TUFT1	BAG3
	RILPL1	ATP5B
	SP4	DNAJC9
	FCGRT	RNF149
	PPP1R16A	STX10
	CCDC125	GPATCH2
	JDP2	ADM
	IFFO2	C6orf125
	TRAK1	GHITM
	CES8	UBQLN1
	GGA2	SPC25
	MMP23B	YDJC
	ADCY6	HLA-E
	TXNIP	C6orf106
	LOC100129550	C19orf62
	BTAF1	SLBP
	TNS4	KIF3B
	ATG12	RAD51C
	RYBP	STEAP3
	ADD3	PCGF1
	SNORA80	RPRD1A
	NFIX	S1PR4
	USP33	MCM3
	C12orf51	LEPROTL1
	CCDC146	ALDH2
	SERPINB2	EAF1
	ZCCHC11	SLC23A2
	CTDSPL	FBXO46
	PLAC2	ATP5SL
	C2orf42	EFHD2
	HTT	IPO13
	KCTD15	FNTA
	CNGA1	AKR1B1
	GHRL	AUH
	EPB41L4B	WDR82
	SMAD5	MED9
	KIAA0240	NDUFV2
	ODZ4	CYCS
	LFNG	FTSJ3
	MBD4	C16orf53
	CARS2	NRP2
	SLC16A5	ABCG1
	NPHP4	TXNRD1
	SNORD97	RAB36
	DUSP1	PTPRCAP
	RXRA	LAT2
	PPP1R3C	C21orf63
	TACC1	EIF4EBP1
	ITPR2	KCTD21
	ZFHX3	RPN1
	SDC2	MBOAT7
	C3orf15	LARS
	NR1H3	ICMT
	R3HDM2	EMG1
	ZNF362	PCNXL3
	C11orf68	PRR5
	PREPL	SNAPC5
	SH3RF1	NUP50
	GAN	POLR2B
	LAMB2L	BSG
	ATP13A5	ZNF207
	MAN1B1	PPP1R2
	EFHC1	SGPP2
	VENTX	SIRT7
	ZNF641	GATAD2B
	LPP	DYNC1I2
	SETDB2	CD53
	MCF2L	SC4MOL
	C2orf67	PON2
	CIC	MARCKSL1
	C7orf38	GCDH
	POMGNT1	MRPS12
	ZNF85	RILPL2
	C1orf66	IGFBP7
	SMAD3	YIPF4
	ZBTB40	ATP6V1B2
	PLXNB1	SLC9A3R1
	RAB14	PNPLA2
	SLCO3A1	C12orf4
	PHF21A	RNASE1
	JAZF1	SLC7A1
	C7orf46	DHRS13
	MAN1C1	VPS29
	KIAA0528	PITPNC1
	ZHX2	C11orf60
	MYO18A	CRLF3
	MTMR11	ACADM
	MUC15	FAM25A
	RNF43	GJA1
	ZMIZ2	LSM4
	DST	CLEC1A
	ZDHHC17	LMTK3
	SIRT1	PIH1D1
	PLXNA1	DCPS
	FAT2	SLAMF1
	LEPREL1	CLP1
	SESN1	GTPBP8
	TESK2	EBNA1BP2
	C11orf46	PRDX1
	RAD54L2	EIF4A1
	RAB11FIP3	SNX30
	MKLN1	RFFL
	TRAM2	ELOVL4
	ZBTB4	ZC3HAV1
	EFNA1	PPP4R1
	CBX5	CDC42EP1
	TSPAN9	STUB1
	C14orf93	KEAP1
	GRTP1	TMEM88
	KRCC1	C7orf40
	PKN2	EIF2S2
	UNC84A	MPI
	MAN2A2	EFTUD1
	FLJ33630	ODF3B
	TMEM2	CTSB
	ZNF274	TXNDC5
	VAMP2	ZSWIM4
	FAM131A	STXBP2
	CHSY1	ACTL6A
	LRP5	MRPL22
	SSBP2	HCLS1
	MUM1	ESPL1
	FAM133B	MIR21
	RASSF6	PI4K2B
	RAB11FIP2	FAM102A
	SORBS1	EEF1B2
	LINGO4	SDHB
	SPTBN1	C16orf57
	SLC23A3	AVL9
	RNPEPL1	WSB2
	USP24	GART
	NEURL1B	VKORC1
	HSPB2	ADM2
	AUTS2	TRPM6
	TBC1D8	AK2
	MFGE8	PAPPA
	KRTCAP3	MUDENG
	NCOR2	DTX3L
	SDC4	MCM6
	ANKRD44	MAPRE1
	C7orf59	IPO9
	GSTA3	CNDP2
	IL20RB	PRICKLE4
	ARL6IP5	FAM110C
	C10orf67	C19orf70
	NUDT7	ITGB3BP
	PLOD1	THOC4
	TOB1	CSNK1A1
	C12orf65	AP1S1
	ZNF14	GPAA1
	ZNF766	PFN1
	MBD6	PFKFB4
	BCHE	MTCH2
	SLITRK6	MIR155HG
	FBXW7	AIM2
	HDAC5	SURF2
	SALL2	TUFM
	TMSL3	ELOF1
	FOXJ3	CCND2
	TNFSF15	IER2
	RSBN1L	KRT75
	BCL9	BLMH
	EPN2	SNX10
	MAP3K1	C19orf22
	WNT2B	ANGEL1
	SRGAP1	GLRX
	ZNF577	NUDCD2
	TRPM4	CBR3
	ARL4A	MRPL46
	SNAPC4	UQCRQ
	GNA11	CALR
	FAM73A	FAM20A
	TSNARE1	XDH
	ANKIB1	DDX49
	DDX59	CD93
	MLL4	MAPKAPK3
	FAM149B1	UQCRFS1
	GATM	PSMB9
	EPHB6	VRK2
	STEAP2	RASAL1
	TCF7L2	CYTH4
	GLI3	ENO1
	ETV3	IL10RA
	NLGN2	LPHN2
	TNS3	CYP2S1
	APCDD1	GNL3
	ADCY2	NKG7
	PTBP2	PYGL
	ZNF692	BYSL
	ZNF621	TRIM10
	RAB40C	EDEM1
	ZNF311	ITGAE
	MOV10	C1orf212
	NHLRC3	DOLK
	KIF21A	PTPRE
	CSRNP3	DENND2D
	VGLL3	FSCN1
	GAMT	SHC3
	ATL1	UBE2C
	BCL2	MRPL14
	FAR1	SLC25A1
	RXRB	ALKBH7
	RFX1	VASH1
	MT1F	ILF2
	C20orf117	MRPL4
	SPRED1	SF3B14
	LOC284023	COX5B
	TTC15	PRKCH
	SH3BP4	MYC
	HMGB1	TMEM51
	ATG10	TWF1
	COL18A1	ETV4
	DDAH2	CCT6A
	SMOC2	PHB2
	RAB40B	APP
	RAPGEF2	PGLYRP4
	MICAL1	APRT
	ZNF141	C14orf109
	CCDC106	ELOVL6
	LPCAT2	SNHG3-RCC1
	LYSMD4	EIF5A
	LIFR	FAM162A
	NLK	TMEM173
	METT11D1	CD164L2
	CLASP1	HNRNPAB
	BBX	SREBF1
	ZC3H18	MINPP1
	DMXL1	CTHRC1
	HMBOX1	ACOT4
	CHD8	COX6B1
	MLL	CDC123
	SNRK	CCT7
	ZNF451	CAPN2
	BRD3	TNFRSF10A
	ICA1	RBKS
	NF1	CDA
	STOX2	CCT3
	TCF3	POLDIP2
	FLNB	PEX13
	ZBTB22	ARF1
	COPZ2	CARD6
	MTA1	BARX2
	RHBDL2	SLC35B1
	EP400	TMEM49
	KIAA1267	IFITM3
	GPER	GSTO1
	DCLRE1C	SUB1
	REEP5	CHI3L1
	DAAM1	TMEM185B
	GRM3	TNIP2
	RUFY3	FAM3D
	ZNF518A	HIF1A
	SRGAP3	MRPL47
	RAB3GAP1	TMEM54
	C6orf225	LIPA
	CALD1	TKT
	NTF4	EHD4
	DNAJC4	C17orf106
	DGCR8	C9orf16
	C5orf30	ATL3
	DKFZP586I1420	HTR3A
	WDR60	ARF4
	PNN	LYPD1
	ZNF292	TYMP
	TP53AIP1	CYBA
	FAM46B	RQCD1
	ZC3H3	UQCRC2
	ZFYVE21	DPP4
	ZNF652	SRD5A1
	SH3GLB2	WDR51A
	AS3MT	MMP3
	POMT2	TAGLN2
	DTWD2	TMEM33
	SIRT5	ATG9B
	GYLTL1B	PNPO
	AMMECR1L	RPL23A
	LONP2	SLC29A4
	OSBPL3	LTB
	ARHGEF7	CST7
	LATS2	NCCRP1
	WWP1	IGSF3
	FBXO18	CACNA2D3
	RABGAP1L	TMEM208
	PLA2G4F	LDLR
	PTPRF	PMM2
	LMO4	NCAPG
	GLTSCR1	IFITM1
	ZMYM4	VNN1
	NUMA1	PPP1CA
	STK3	EBPL
	SLC43A1	MGC72080
	FLJ25006	IL1B
	PRPF3	HSPA8
	NBAS	TNFAIP1
	TSPAN8	C16orf70
	SSH2	RUNDC3A
	RERE	GNA15
	SEPW1	DBI
	ERP44	AMD1
	CCDC88A	MTHFD2
	MAPK8IP3	FEN1
	DMC1	LRRC8D
	HOXA3	GOT2
	ZFP3	HDGF
	TTC37	PRDM1
	POLR3GL	DPP3
	NTF3	FAM100B
	SPEN	HN1
	CES2	STEAP4
	RNF141	FAM96A
	ERGIC2	SNRPD1
	PRKCDBP	PARP14
	MKL2	ACAA2
	SLC30A4	PRELID1
	FAM125B	NHP2
	FAM184A	WARS
	TFB1M	SOCS1
	C1orf26	SEPX1
	C3orf59	PRDX3
	EFS	ARPC5L
	HEBP1	PLK2
	ATXN1	SBNO2
	WDR48	CCL21
	PTPN3	RTP4
	CCDC127	LAMP3
	ZNF821	CAMP
	SIK2	KIF11
	FBXO31	UPP1
	MLL5	ZBED2
	FUT8	IFIT1
	CAV1	ST14
	C11orf63	RAN
	FARP2	C1QTNF5
	FBLN2	TUBA1C
	EIF2C4	AASS
	VANGL2	CNIH
	PIK3R1	ULBP2
	ORMDL1	SFT2D2
	RALGDS	GYG1
	STIM2	ACO2
	CYP4B1	SERINC2
	TNNI3	CRYL1
	KIAA1688	CYP27B1
	CUL3	TPBG
	LRRFIP1	BCL3
	KATNAL1	CLPX
	GLIPR2	SDR9C7
	ABCA8	FURIN
	FNIP2	SIAH2
	LHFP	LIPN
	TMEM30A	KIAA0513
	DCAF10	C6orf105
	AGR3	COPE
	ARID4B	CD58
	C8orf45	PPARGC1B
	C14orf64	CCR7
	GUCA1B	RDH10
	C2orf3	OASL
	SORL1	TRIB2
	DRAM1	IL4R
	EXOSC7	ANKRD29
	SLC12A9	HOMER3
	GALNT2	HTATIP2
	RNPEP	CHCHD10
	SLC39A14	NFE2L3
	TXNDC15	BPIL2
	CTDSP1	GDPD3
	LRFN5	SLC1A5
	C9orf5	UBE2T
	DENND4B	LYN
	C14orf145	CDK2AP2
	LRP3	TMEM171
	ZCCHC7	PGAM5
	STX16	MRPL20
	SGCA	IDH3A
	SNX25	NOP16
	AHDC1	WFDC12
	FNDC3B	TRIM15
	EIF2C2	WIPI1
	RCCD1	SPNS2
	FBXL2	SQRDL
	RSF1	TRIP13
	NGEF	TNIP3
	CHPT1	NUDT5
	LDB1	TNFSF10
	PWWP2A	GBA
	LASP1	CD247
	SRGAP2	CD48
	PLXNA2	C20orf24
	PHF20L1	MFHAS1
	EPOR	TMEM206
	CEP110	AURKB
	SERGEF	PGM2
	C3orf58	NPM3
	TUG1	KIF20A
	ASS1	PPIC
	B3GNT1	C9orf46
	TEAD2	RPL34
	NAPEPLD	IFI16
	CNKSR1	OAS2
	C3orf64	CKAP4
	NFIC	MOCOS
	C8orf58	IFI30
	PER2	CKS2
	NME4	CFB
	KLF13	IRAK2
	ZNF544	IL7R
	BCMO1	CD7
	C8orf37	LIPG
	NSUN7	CD3D
	ARFGAP2	MED8
	PPP1R15A	HAS3
	PAN3	PDSS1
	DNAJB2	SAMD9
	TRRAP	TMEM45A
	ODF3L1	NOLC1
	TPST1	PGD
	MIR744	DDX60
	TEAD3	AURKA
	HIVEP2	HSD17B2
	ATP9B	OAS1
	RAVER2	SGK1
	EXOC4	OAS3
	PSTPIP2	GPR68
	PDGFA	SERPINB1
	GNAI1	FUT2
	DUSP8	IRAK3
	ZNF430	LRG1
	OSBPL1A	VSNL1
	BANP	SOD2
	RHBDF1	PARP9
	C4orf47	CRABP2
	AMOTL2	SCO2
	SEMA3F	CXCL10
	MEGF9	CARD18
	IRF6	SLC7A5
	CPEB3	CHI3L2
	BTN3A1	LGALS3BP
	STIM1	KLK13
	MEIS3P1	CCL20
	IL17RD	ISG15
	CPOX	GZMB
	TES	SOX7
	ZDHHC6	ZC3H12A
	PAFAH1B1	ATP1B1
	RNF180	EHF
	CCNG2	SPRR2E
	ASXL1	HAL
	EPB41L2	ABCG4
	PLA2R1	S100P
	CD63	FABP5
	CYB5R3	KRT6B
	GPR98	S100A12
	HMG20A	ATP12A
	OCIAD1	GJB6
	BAG4	IFI27
	CDK6	SPRR2D
	H6PD	CCBP2
	SLC25A17	MUCL1
	HBS1L	SPRR2G
	CHD1	IGFL1
	MAP3K2	GJB2
	RBL2	TCN1
	BRSK1	C10orf99
	ZBTB25	LCE3D
	HLCS	SPRR1B
	USP46	KRT6A
	LAMC1	LCE3A
	NENF	SERPINB3
	PCNT	SPRR2C
	NEXN	S100A8
	MAPKBP1	SPRR2A
	UBE2B	SPRR2F
	KIAA1598	PI3
	CD81	S100A9
	TMEM68	S100A7A
	VPS8	S100A7
	UNC13B
	GJC1
	SYTL2
	MACROD1
	C12orf76
	CRAMP1L
	FKTN
	FAM171B
	ST13
	MSRB2
	SCD5
	WNT5B
	RGL1
	GNB1
	KIAA1715
	UBE4B
	BRD9
	SPG7
	LOC144438
	PEA15
	BCL11B
	VPS37C
	C8orf40
	LRP6
	CNTROB
	ZNF513
	TCF25
	REPS1
	TRMT61A
	BNIPL
	IL1RAP
	AKNAD1
	MGMT
	AFF1
	EGFR
	FYN
	CORO2B
	RARA
	NAT6
	CDKL3
	SETD2
	RAB3GAP2
	CREBBP
	AZI1
	SNX27
	YLPM1
	IFFO1
	TPD52
	PBXIP1
	HAS1
	PLEKHM1
	SH3D19
	ZNF787
	SLC37A1
	NECAP1
	CENPB
	AHNAK
	DTWD1
	EIF2C1
	FBXO32
	SNORA29
	ZNF563
	CORO1C
	PUM2
	DGCR6L
	MITF
	SAPS3
	KIAA0922
	CLIP2
	EML4
	SUOX
	ANKMY1
	ULK1
	VEGFB
	FBXW4
	MEF2A
	JPH1
	RTN4
	PRKCZ
	ZNF644
	YAP1
	ABCC10
	CNRIP1
	TK2
	KIAA1530
	COMMD3
	ZNF146
	SYNPO2
	ERGIC1
	ANKFY1
	SLC44A2
	HSPA1L
	FAM65A
	PNMAL2
	JMJD1C
	USP15
	CELSR2
	MED23
	PRKD3
	KIF1B
	ZNF618
	TIAF1
	RSPH1
	FNIP1
	GPNMB
	TCF12
	TRIM44
	CASP6
	MYO10
	TBC1D9B
	MTCH1
	ARL15
	FARP1
	CLDN20
	UBE3A
	TBC1D22B
	ANKRD16
	RORA
	ITGB5
	PTK2
	PPP2R3A
	ERMAP
	RASSF7
	CBFA2T2
	EEPD1
	ADARB1
	LYST
	KIAA1522
	CLDN14
	SMARCE1
	WFIKKN2
	GUSBL2
	PPARA
	VARS2
	SYNE2
	SHCBP1
	SYNGR1
	ACAT1
	CAMSAP1L1
	PPP1R1B
	PIGU
	PCID2
	PABPN1
	AEBP2
	WNT2
	NARG2
	GCNT2
	SP3
	ASPSCR1
	ATPBD4
	ZMYND11
	CCS
	ARMC1
	CCNB1IP1
	RG9MTD3
	ASB6
	ZNF828
	NUB1
	TRIO
	SEC16A
	CAMLG
	CCDC92
	RIPK1
	RB1CC1
	TBX19
	TTC8
	KBTBD10
	UVRAG
	PELP1
	EEF1AL7
	PRR4
	DLGAP4
	EZH1
	TFAP2A
	TMED1
	BASP1
	P4HA2
	RABL2A
	GSTTP2
	ELMO2
	TSPAN2
	TMOD4
	PPP2R4
	ANKRD57
	DDR1
	VIT
	LRRN4CL
	CHN2
	PDE5A
	FBXW8
	DGKD
	TRERF1
	EGF
	SCP2
	SMARCA4
	PARN
	GNS
	SMURF1
	SUV420H1
	EPB41
	HERC2
	INPP5F
	TNFRSF19
	TP53I11
	MFN2
	FBXO17
	LIG3
	UBXN2A
	TDRD10
	CUL4A
	FMO6P
	C1orf88
	THRA
	CNGB1
	TARP
	SMARCD1
	SOX5
	RASAL2
	CASZ1
	ZNF441
	FAM10A4
	LRRC37B
	SMURF2
	DNAJC13
	JUB
	SERPINA5
	RSL24D1
	RICTOR
	LOC338799
	DIXDC1
	KANK1
	POLR2A
	SFRS2IP
	CPNE3
	PRR15L
	CDC40
	FOXO3
	ADRBK2
	POLH
	PDGFB
	OSBPL7
	C6orf35
	STON1
	UBN1
	ANGPTL5
	KIAA1107
	ZNF699
	CSNK1E
	AGRN
	C15orf55
	INPP5A
	PTGER2
	FRYL
	C9orf106
	DCST2
	SNRPE
	UBR5
	LOC286238
	FOXN3
	TAF3
	ARHGEF18
	LRRC69
	SLC26A11
	ANTXR1
	TTC3
	GKAP1
	RNF38
	SNORA20
	PHKG1
	RHOBTB1
	KIAA0090
	LRRC48
	ST7OT3
	OCLM
	CD276
	NUMB
	IL15
	PDE6H
	LSP1
	MGC23270
	POLR3C
	UACA
	MS4A5
	SUZ12P
	C15orf28
	ABR
	CMIP
	CBWD6
	KRT71
	C10orf107
	LOC100133545
	BCL7A
	ZNF107
	SNORA40
	CSH2
	IL17RC
	PPIL3
	PLA2G6
	CHRM5
	2022-03-04
	C9
	DYX1C1
	TCF20
	WNT8B
	FRS2
	WDR31
	ZCCHC2
	PDC
	ABRA

## Sheet: WGCNA
Hub genes in module turquoise based on GSE13355, GSE53552, GSE136757, GSE30999, GSE85034, GSE106992, GSE6710	genes	genes in each module	module turquoise	module brown	module blue	module grey
	ABCA12		AADAC	ACADM	A4GNT	AGER
	ADAMDEC1		AASS	ACO1	ACTL6B	ATF3
	ADAP2		ABCA12	ACOX2	ACTL8	BTN3A2
	ADRB2		ABCA6	ACP6	ADRA1B	CA2
	AKR1B10		ABCG4	ACSBG1	ADRA1D	CCDC102B
	ALOX12B		ABLIM3	ACSM3	AGRP	CD1E
	ANG		ACAD8	AGPAT1	AMELX	CLCA4
	APOL1		ACADL	AGR2	ANGPT4	CYTL1
	APOL6		ACE2	ALOX15B	ANKRD1	DDX3Y
	ARHGEF10		ACP5	APOC1	ANP32D	DLX2
	ARNTL2		ACPP	BCKDHB	APOL5	DPEP2
	ARSF		ACSF2	BPY2	ASCL3	DPP6
	ASF1B		ACTA1	CDA	ATP4A	EGFL6
	ATP10B		ACTA2	CIDEA	ATXN3L	EIF1AY
	ATP12A		ACTC1	COMP	ATXN8OS	ERAP2
	ATP1A2		ACTG2	CRAT	AVP	F7
	AURKA		ADAM23	CUX2	AVPR1B	FAM118A
	AVEN		ADAMDEC1	CYP4F8	BMP3	FMO2
	BCAR3		ADAMTS5	DHRS2	BPESC1	GPRC5D
	BCL2A1		ADAP2	DIRAS3	BTG4	GSTT1
	BIRC5		ADCY6	DTX4	C3orf27	GUCY1B2
	BLM		ADCY8	EGR2	C4BPA	GUCY2C
	BUB1B		ADCYAP1	FA2H	C8B	HLA-DQA1
	C12orf5		ADH1B	FABP7	C8orf17	HLA-DQB1
	C14orf132		ADH1C	FADS2	CABP5	HLA-DRB4
	CAMK2N1		ADH7	FAR2	CCR9	HLX
	CARHSP1		ADIPOQ	FASN	CCT8L2	HP
	CBX7		ADORA2B	FBP1	CEACAM21	IGFBP2
	CCL20		ADRA2A	FMO3	CETN1	IGJ
	CCNA2		ADRB2	GAL	CFHR5	IL1R2
	CCNB1		AEN	GATA6	CHAT	KBTBD11
	CCNB2		AGT	GLDC	CHRM2	KLKB1
	CCNE1		AGTR1	GPR64	CHRM5	KRT32
	CD24		AIM2	HAO2	CNGA3	KRT33B
	CDCA8		AIP	HGD	CNR2	KRT35
	CDH3		AKAP12	HIST1H1C	COL9A1	KRT38
	CDKN3		AKR1B10	HIST1H2AE	COLEC10	KRT75
	CENPE		ALDH1A1	HRASLS	CPN1	KRT81
	CENPN		ALDH1A3	HSD11B1	CPSF1	KRT83
	CEP55		ALDH3A1	HSD3B1	CRX	KRT85
	CHAC1		ALDH3B2	HYAL1	CRYGB	KRT9
	CHEK1		ALOX12	INSIG1	CSRP3	KRTAP1-3
	CHI3L2		ALOX12B	KRT4	CST8	KRTAP4-7
	CHPT1		ALOX5AP	MUC1	CXCR5	KRTAP5-8
	CHRNA9		ALOXE3	MVD	CYP2F1	LDHC
	CKS2		AMIGO2	PCTP	DAO	MARCO
	CLDN8		AMT	PDE6A	DIO1	MCTP1
	CLEC7A		ANAPC2	PDZK1	DISC1	NDP
	COBL		ANG	PECR	DOC2A	NELL2
	CORO2B		ANGPTL4	PEX11A	DPEP1	NLGN4Y
	COX7A1		ANGPTL7	PLA2G7	DRD4	NR4A2
	CRABP2		ANXA3	PNMAL1	DUSP21	OLFM4
	CRIP1		ANXA9	PNPLA3	EPX	PADI3
	CRY2		AOC3	RARRES1	EPYC	PAX1
	CRYAB		AOX1	SFTPD	F13B	PEX6
	CXCL1		APLNR	SGK2	FOXB1	PLA2G2A
	CXCL13		APOBEC3B	SLC26A3	FSHR	POMZP3
	CXCL2		APOD	SLC27A2	GABRA6	PPBP
	CYP7B1		APOL1	SLC30A10	GAGE1	PPFIA4
	DBN1		APOL6	SLC3A1	GBX1	PRG2
	DLGAP5		AQP5	SLC46A3	GC	PRKY
	DSC2		AQP9	SLCO4C1	GLRA1	PRND
	DSG3		ARC	SOAT1	GNAT3	PTGDS
	EFNB2		ARG1	SORD	GNG13	RASL10A
	EHF		ARHGEF10	SULT4A1	GNRH2	RHBG
	EIF4EBP1		ARHGEF17	TAGLN3	GPR31	RPS4Y1
	EMX2		ARNTL2	TF	GSC2	S100A3
	EPHA2		ARSF	TMEM97	HIST1H2BN	SLC4A3
	EPHB2		ASF1B	TMPRSS11E	HIST1H4L	SNORA21
	EPN3		ASNA1	UBIAD1	HOXD12	SPP1
	EXO1		ASPA	UPB1	HPD	SRY
	FABP5		ASPM	ZNF117	HTN3	SST
	FAM117A		ASPN		HTR1D	TCHH
	FAM134B		ATHL1		IAPP	TDRD12
	FGFBP1		ATP10B		IFNA1	TRMT2B
	FLVCR2		ATP12A		IFNA14	TRPM1
	FOSL1		ATP1A2		IFNA16	TTTY15
	FOXE1		ATP1B2		IFNA17	UTY
	FST		ATP2A3		IFNA4	WISP3
	FUT2		ATP6V0A4		IFNA5	XIST
	FUT3		ATP6V1B1		IFNA8	ZFY
	FXYD6		AURKA		IL21	ZIC1
	GALNT6		AVEN		INSL6
	GBP1		BAMBI		ITIH1
	GDPD3		BARD1		KCNG2
	GGH		BATF3		KIR2DS3
	GK		BCAR3		KIR3DL1
	GM2A		BCHE		LENEP
	GNA15		BCL2A1		LIPF
	GZMB		BEGAIN		LRIT1
	HBEGF		BIRC3		LUZP4
	HERC6		BIRC5		MAGEA10
	HMMR		BLM		MAGEA12
	HPSE		BLMH		MAGEA4
	HS3ST3A1		BST1		MAGEB3
	HYAL4		BST2		MAS1
	IFI27		BTC		MC5R
	IFI6		BUB1B		MIA2
	IL19		BYSL		MMP20
	IL4R		C10orf10		MS4A12
	INA		C11orf80		MYH1
	IRF7		C12orf5		MYL1
	ISG15		C14orf132		MYL2
	ISG20		C1QA		MYOD1
	ITM2A		C1QB		NDST4
	KCNJ15		C1orf68		NEUROD1
	KIAA0101		C1orf95		NEUROD4
	KIF11		C21orf91		NEUROD6
	KIF18B		C3AR1		NOX3
	KIF20A		C3orf52		NPBWR2
	KIF4A		C5AR1		NPHS2
	KLK10		C6		NTSR2
	KLK13		C7		OMP
	KLK6		C7orf63		OR10C1
	KRT16		CA3		OR12D2
	KRT6A		CA6		OR12D3
	KRT6B		CAB39L		OR2J3
	KYNU		CACNA2D3		OR2S2
	LAD1		CACNB4		OR3A1
	LAMP3		CALB2		OR6A2
	LCN2		CALM1		PAPOLB
	LMNB2		CALML5		PCDH11X
	LRP8		CAMK2N1		PCDHA2
	LYN		CARD14		PGLYRP1
	MAP1B		CARHSP1		POU4F3
	MAPKAPK3		CASP5		PPY2
	MELK		CASQ2		PRAMEF11
	MICALL1		CBLC		PTH
	MKI67		CBX7		REG1P
	MPZL2		CCL13		RXFP3
	MX1		CCL18		S100G
	MXD1		CCL19		SCT
	NAMPT		CCL2		SEMG1
	NBEA		CCL20		SERPINA2
	NCALD		CCL21		SLC22A8
	NCAPG		CCL22		SLC25A31
	NDC80		CCL23		SLC6A7
	NETO2		CCL27		SNCB
	NLRX1		CCL4		SOX18
	NOD2		CCL5		SOX21
	NR3C2		CCL7		SPP2
	NRN1		CCL8		SSTR4
	OAS1		CCNA2		TAAR2
	OAS2		CCNB1		TAAR3
	OAS3		CCNB2		TAS2R16
	OASL		CCNE1		TAS2R3
	OTUB2		CCNO		TAS2R7
	OVOL1		CCR6		TAS2R8
	PBK		CCT6B		TBR1
	PDZK1IP1		CD14		TLX3
	PGBD5		CD163		TM4SF4
	PGLYRP4		CD177		TM4SF5
	PHLDA2		CD1A		TREH
	PI3		CD1B		TSSK1B
	PLCB4		CD1C		UCP1
	POLE2		CD2		USH2A
	PPARGC1A		CD200		VSX1
	PPIF		CD207		WNT1
	PRC1		CD24
	PRDM1		CD248
	PRKCQ		CD34
	PRSS2		CD3D
	PRSS22		CD3E
	PRSS3		CD48
	PTTG1		CD52
	PYCARD		CD69
	RAB27A		CD83
	RAB27B		CD8A
	RABGGTA		CDC20
	RAI14		CDCA3
	RAI2		CDCA8
	RASGRP1		CDH19
	RCAN2		CDH3
	RDH16		CDK5
	RGS1		CDKN3
	RGS20		CDO1
	RHCG		CDR1
	RNASE4		CDSN
	RRM2		CEACAM6
	RSAD2		CEBPD
	RTP4		CEL
	S100A12		CENPE
	S100A9		CENPN
	SAMD9		CEP55
	SCO2		CFD
	SELENBP1		CFH
	SEMA3G		CH25H
	SERPINA1		CHAC1
	SERPINB1		CHAD
	SERPINB13		CHEK1
	SERPINB3		CHI3L2
	SERPINB4		CHL1
	SFT2D2		CHN1
	SHB		CHP2
	SHROOM2		CHPT1
	SLC16A6		CHRDL1
	SLC23A2		CHRM3
	SLC5A1		CHRNA9
	SLC6A14		CHST1
	SLC7A11		CHST2
	SLC7A5		CIDEC
	SMAGP		CILP
	SMPD3		CKMT2
	SORBS2		CKS2
	SPC25		CLDN1
	SPRR1B		CLDN10
	SPRR2B		CLDN17
	SPRR2C		CLDN7
	SPTLC2		CLDN8
	SQLE		CLEC1A
	SSPN		CLEC5A
	STAT1		CLEC7A
	TCN1		CLIC3
	TGM1		CLSTN2
	TGM3		CMA1
	TIMP3		CNGA1
	TK1		CNN1
	TLE3		CNN3
	TMC5		CNNM4
	TMEM40		COBL
	TMEM47		COCH
	TMPRSS11D		COL11A1
	TMPRSS4		COL21A1
	TNIP3		COL4A1
	TOP2A		COL6A2
	TPX2		COL7A1
	TRIP13		COLEC12
	TSPAN8		COLQ
	TTC9		COPG2IT1
	TTK		CORIN
	TUBG1		CORO1A
	TYMP		CORO2B
	UBE2C		COX7A1
	ULBP2		CP
	UPP1		CPA3
	VNN1		CPE
	VNN3		CRABP1
	WNT5A		CRABP2
			CRCT1
			CRIP1
			CRIP2
			CRISP2
			CRISP3
			CRNN
			CRY2
			CRYAB
			CSN1S1
			CSPG4
			CST6
			CST7
			CTGF
			CTNNBIP1
			CTSG
			CTSW
			CX3CR1
			CXCL1
			CXCL10
			CXCL11
			CXCL13
			CXCL2
			CXCL6
			CXCL9
			CYB5R4
			CYBRD1
			CYP1A1
			CYP1B1
			CYP24A1
			CYP27B1
			CYP2C18
			CYP2E1
			CYP2J2
			CYP39A1
			CYP4B1
			CYP4F11
			CYP4F12
			CYP4F2
			CYP7B1
			CYR61
			CYTIP
			DACT1
			DBN1
			DCAF16
			DCLK1
			DCPS
			DCT
			DDX58
			DDX60
			DENND1C
			DES
			DFNA5
			DFNB31
			DGCR11
			DGCR6L
			DHRS9
			DHX38
			DIO2
			DIXDC1
			DKK1
			DKK2
			DLG2
			DLGAP5
			DLX5
			DNA2
			DNASE1L2
			DNASE1L3
			DNM1
			DPP4
			DPT
			DPY19L4
			DPYSL3
			DSC1
			DSC2
			DSG3
			DTL
			DUSP2
			DUSP5
			E2F8
			ECT2
			EDAR
			EDN1
			EFHD1
			EFNB2
			EGF
			EGFL7
			EGLN3
			EHF
			EIF2S3
			EIF4EBP1
			ELANE
			ELF3
			EMCN
			EMX2
			EN1
			ENO2
			ENPP4
			EPCAM
			EPHA2
			EPHB2
			EPHX2
			EPN3
			ERBB4
			ERC2
			EREG
			ESPL1
			ESRRG
			ETHE1
			EVI2B
			EXO1
			F10
			F3
			F5
			FABP3
			FABP4
			FABP5
			FAM107A
			FAM117A
			FAM124B
			FAM134B
			FAM149A
			FAP
			FAT4
			FBLN2
			FBLN5
			FBN1
			FBN2
			FBXL7
			FBXO5
			FCER1G
			FCGBP
			FCGR1B
			FCGR2B
			FCGR3B
			FGF13
			FGFBP1
			FGL2
			FGR
			FHL1
			FHOD3
			FKBP10
			FKBP1B
			FKBP5
			FKBPL
			FLG
			FLNC
			FLRT3
			FLVCR2
			FMO1
			FMO4
			FOLH1B
			FOLR1
			FOLR2
			FOS
			FOSB
			FOSL1
			FOXA1
			FOXC1
			FOXD1
			FOXE1
			FOXI1
			FOXM1
			FPR1
			FRZB
			FST
			FSTL1
			FUT1
			FUT2
			FUT3
			FXYD1
			FXYD6
			FZD7
			G0S2
			G6PD
			GABRA4
			GABRP
			GALNT12
			GALNT6
			GAN
			GAS2
			GBP1
			GDF10
			GDPD2
			GDPD3
			GDPD5
			GEM
			GFPT2
			GFRA1
			GGH
			GGTLC1
			GINS1
			GJB5
			GK
			GLUL
			GM2A
			GNA15
			GNAZ
			GNLY
			GPC3
			GPD1
			GPR1
			GPR110
			GPR12
			GPR143
			GPR171
			GPR18
			GPR183
			GPR65
			GPRASP1
			GPRC5A
			GPRIN2
			GPX2
			GPX3
			GRB14
			GREM1
			GRIA2
			GSPT2
			GSTA3
			GSTM3
			GSTM5
			GSTT2
			GSTZ1
			GTF2H2B
			GUF1
			GYG2
			GYPC
			GYS1
			GZMA
			GZMB
			GZMH
			GZMK
			HAL
			HBB
			HBEGF
			HCG26
			HCG4
			HDC
			HELLS
			HERC5
			HERC6
			HEY2
			HIF3A
			HIST1H1D
			HIST1H2BD
			HIST1H2BE
			HIST1H3C
			HJURP
			HLA-DPA1
			HLA-DQB2
			HMBOX1
			HMBS
			HMGCS1
			HMGCS2
			HMMR
			HMOX1
			HNRNPL
			HOMER1
			HOXA5
			HOXB2
			HOXC11
			HPGD
			HPGDS
			HPSE
			HRSP12
			HS3ST3A1
			HSD11B2
			HSD17B2
			HSPA4L
			HSPA6
			HSPB2
			HSPB6
			HSPB7
			HSPBP1
			HTR3A
			HYAL4
			HYMAI
			ICOS
			ID1
			IDE
			IDO1
			IFI27
			IFI35
			IFI44
			IFI44L
			IFI6
			IFIT1
			IFIT3
			IFNG
			IGF1
			IGFBP3
			IGFBP5
			IGFBP6
			IL12B
			IL17A
			IL18RAP
			IL19
			IL1B
			IL24
			IL26
			IL2RB
			IL2RG
			IL32
			IL4R
			IL6
			IL7R
			INA
			INHBB
			INPP5J
			INSM1
			IRF1
			IRF7
			IRF8
			ISG15
			ISG20
			ISL1
			ISLR
			ITGA7
			ITGA8
			ITGAL
			ITGAM
			ITGBL1
			ITIH5
			ITK
			ITM2A
			ITM2C
			IVL
			KCNJ15
			KCNJ8
			KCNK5
			KCNK7
			KCNN4
			KIAA0101
			KIAA0895
			KIAA0922
			KIAA1324
			KIF11
			KIF15
			KIF18B
			KIF20A
			KIF21B
			KIF23
			KIF2A
			KIF4A
			KIFC1
			KLK10
			KLK12
			KLK13
			KLK5
			KLK6
			KLK7
			KLK8
			KLRB1
			KRT15
			KRT16
			KRT18
			KRT19
			KRT2
			KRT24
			KRT31
			KRT33A
			KRT37
			KRT6A
			KRT6B
			KRT7
			KYNU
			LAD1
			LAIR2
			LAMC3
			LAMP3
			LARP6
			LCAT
			LCE2B
			LCN2
			LCP1
			LEP
			LGALS1
			LGALS2
			LGALS3BP
			LGI1
			LGR5
			LHCGR
			LHX2
			LIF
			LILRA4
			LILRB2
			LILRB5
			LIPC
			LIPG
			LMCD1
			LMNB2
			LMO3
			LMOD1
			LOC155060
			LOC202181
			LONRF1
			LOR
			LOX
			LPHN3
			LPL
			LRMP
			LRP5L
			LRP8
			LRRC15
			LRRC17
			LRRC2
			LRRC20
			LRRC32
			LRRC36
			LRRC37A3
			LRRTM2
			LSP1
			LTF
			LUM
			LY6G6C
			LY86
			LYN
			LYPD1
			LYVE1
			LYZ
			M6PR
			MAL
			MALL
			MAN2A1
			MAP1B
			MAP1LC3C
			MAP2
			MAP4K1
			MAPKAPK3
			MAT1A
			MATN4
			MB
			MCM10
			MCM5
			MDFI
			MEIS3P1
			MELK
			MEOX1
			MEST
			MFAP4
			MFAP5
			MFHAS1
			MFSD6
			MIA
			MICALL1
			MICB
			MID2
			MINPP1
			MKI67
			MLPH
			MLXIPL
			MME
			MMP1
			MMP12
			MMP27
			MMP28
			MMP3
			MMP7
			MMP9
			MMRN1
			MNDA
			MOCOS
			MPHOSPH8
			MPP3
			MPZ
			MPZL2
			MRPL12
			MRPS18A
			MS4A4A
			MS4A6A
			MSMB
			MST1
			MSX1
			MTG1
			MUC16
			MUC7
			MX1
			MX2
			MXD1
			MYBPC1
			MYC
			MYCN
			MYEF2
			MYH11
			MYH3
			MYL9
			MYLK
			MYO15B
			MYO5C
			MYOC
			MYOM2
			MYOT
			MYRIP
			NAMPT
			NAP1L3
			NAPG
			NAT1
			NAT6
			NBEA
			NCALD
			NCAPG
			NCAPH
			NCF2
			NDC80
			NDRG4
			NEDD4L
			NEIL3
			NELL1
			NES
			NETO2
			NFAT5
			NFE2L3
			NFIX
			NID2
			NINJ1
			NINL
			NLRP2
			NLRX1
			NMU
			NOD2
			NOP2
			NOS2
			NOTCH4
			NOVA1
			NPL
			NPTX1
			NPTX2
			NR1D2
			NR1H3
			NR2F1
			NR3C2
			NRBF2
			NRIP1
			NRIP2
			NRN1
			NRTN
			NUDT1
			NUDT11
			NUSAP1
			OAS1
			OAS2
			OAS3
			OASL
			OBP2A
			OCA2
			ODC1
			OGN
			OIP5
			OLFML1
			OLFML3
			OMD
			OSR2
			OTUB2
			OVGP1
			OVOL1
			P2RX1
			P2RY1
			P2RY13
			P2RY2
			P4HTM
			PAIP2B
			PAK3
			PALM
			PAMR1
			PAQR6
			PBK
			PCK1
			PCOLCE2
			PCP4
			PCSK1
			PCSK1N
			PCSK2
			PCSK5
			PDE9A
			PDGFD
			PDGFRL
			PDZK1IP1
			PDZRN4
			PEX13
			PGBD5
			PGLYRP4
			PHKA1
			PHLDA2
			PHYHIP
			PI3
			PIGZ
			PIK3C2G
			PIP
			PKD1P1
			PKP1
			PLA2G16
			PLA2G2F
			PLA2G3
			PLA2G4C
			PLAC8
			PLAG1
			PLAGL2
			PLAT
			PLAUR
			PLCB4
			PLCD1
			PLCH2
			PLEKHA1
			PLLP
			PLN
			PLP1
			PLXDC1
			PMAIP1
			PMCH
			PNKP
			POLE2
			PON3
			POR
			POSTN
			PPAP2B
			PPAP2C
			PPARG
			PPARGC1A
			PPIF
			PPP1R1A
			PPP1R3C
			PPP4C
			PRB1
			PRB3
			PRB4
			PRC1
			PRDM1
			PRF1
			PRG4
			PRICKLE3
			PRKAR2B
			PRKCDBP
			PRKCQ
			PROL1
			PROM1
			PRPH
			PRR15L
			PRRC1
			PRSS2
			PRSS22
			PRSS3
			PRSS8
			PSAT1
			PSG4
			PSG7
			PSMC3
			PSORS1C2
			PSPH
			PSRC1
			PTGFR
			PTGS2
			PTN
			PTPN20B
			PTTG1
			PTX3
			PXMP4
			PYCARD
			RAB27A
			RAB27B
			RAB31
			RAB36
			RABGGTA
			RAD51AP1
			RAI14
			RAI2
			RAMP2
			RARRES2
			RASGRP1
			RASL12
			RBBP5
			RBP4
			RCAN2
			RDH16
			RELN
			REN
			RERGL
			RFWD3
			RGN
			RGS1
			RGS13
			RGS19
			RGS20
			RHCG
			RHOG
			RIT1
			RNASE4
			RNASE6
			RND1
			RNF128
			RNF39
			ROPN1B
			RPRD1A
			RRM2
			RSAD2
			RTN1
			RTP4
			RUVBL1
			RYR3
			S100A1
			S100A12
			S100A7
			S100A8
			S100A9
			S100P
			SAMD9
			SAMHD1
			SAMSN1
			SASH3
			SCAPER
			SCD
			SCG5
			SCGB1D2
			SCGB2A1
			SCGB2A2
			SCN2A
			SCN3A
			SCO2
			SCRG1
			SDC2
			SEC31B
			SELE
			SELENBP1
			SELL
			SELP
			SEMA3C
			SEMA3E
			SEMA3G
			SERHL2
			SERPINA1
			SERPINA3
			SERPINA5
			SERPINB1
			SERPINB13
			SERPINB2
			SERPINB3
			SERPINB4
			SERPINB7
			SERPINB8
			SERPINH1
			SF3A2
			SFRP1
			SFRP4
			SFT2D2
			SGCA
			SGCE
			SGCG
			SH2D2A
			SH3BGR
			SHB
			SHC2
			SHCBP1
			SHROOM2
			SIAH2
			SIGLEC1
			SIM1
			SIRPG
			SIX1
			SKA1
			SLAMF7
			SLAMF8
			SLC12A2
			SLC12A8
			SLC14A1
			SLC16A10
			SLC16A4
			SLC16A6
			SLC18A2
			SLC22A4
			SLC23A2
			SLC26A2
			SLC26A4
			SLC27A6
			SLC28A3
			SLC2A1
			SLC2A10
			SLC31A1
			SLC34A2
			SLC39A2
			SLC39A4
			SLC39A6
			SLC43A1
			SLC47A1
			SLC5A1
			SLC6A1
			SLC6A14
			SLC6A16
			SLC7A11
			SLC7A5
			SLIT2
			SLPI
			SLURP1
			SMAGP
			SMPD3
			SNRNP40
			SNX10
			SOD3
			SORBS2
			SOX9
			SPAG5
			SPATA20
			SPC25
			SPINK1
			SPOCK1
			SPRR1A
			SPRR1B
			SPRR2B
			SPRR2C
			SPRR3
			SPRY2
			SPTLC2
			SQLE
			SRM
			SSPN
			ST7L
			STAC
			STAG3L3
			STAT1
			STAT3
			STAT4
			STEAP1
			STEAP4
			STIP1
			STK32B
			STMN2
			STRN4
			STS
			STXBP6
			STYK1
			SULT1E1
			SULT2B1
			SUSD4
			SUSD5
			SV2B
			SYNM
			SYT17
			TAC1
			TAGLN
			TBL1XR1
			TBX19
			TCAP
			TCF7L1
			TCN1
			TDO2
			TENC1
			TET3
			TFAP2B
			TG
			TGFA
			TGFBR3
			TGM1
			TGM3
			THBS4
			THG1L
			THY1
			TIMP3
			TIMP4
			TK1
			TLE2
			TLE3
			TLR1
			TLR2
			TLR3
			TLR7
			TM7SF2
			TMC5
			TMED2
			TMEM100
			TMEM159
			TMEM176A
			TMEM40
			TMEM47
			TMPRSS11D
			TMPRSS4
			TNFAIP6
			TNFRSF21
			TNIP3
			TNMD
			TNN
			TNNC1
			TNNI2
			TNNT1
			TNNT2
			TOM1
			TOMM22
			TOP2A
			TP53I3
			TPPP
			TPPP3
			TPSAB1
			TPSB2
			TPX2
			TRAT1
			TRIL
			TRIM10
			TRIP13
			TRMT1
			TROAP
			TSPAN8
			TTC9
			TTK
			TUBG1
			TUBG2
			TUT1
			TYMP
			TYROBP
			UBE2C
			UBE2M
			UCHL1
			UGT2B28
			ULBP2
			UNC93A
			UPK1A
			UPP1
			USP18
			USP9Y
			VCAN
			VGLL3
			VILL
			VLDLR
			VNN1
			VNN3
			VSIG4
			VSNL1
			VTCN1
			WARS
			WEE1
			WFDC1
			WFDC2
			WIF1
			WISP2
			WNT2
			WNT4
			WNT5A
			XAF1
			XDH
			XK
			XPC
			XPNPEP2
			YBX2
			YOD1
			ZBED2
			ZBP1
			ZBTB16
			ZBTB38
			ZBTB44
			ZBTB6
			ZFP2
			ZFPM2
			ZMAT3
			ZNF10
			ZNF12
			ZNF165
			ZNF227
			ZNF264
			ZNF273
			ZNF334
			ZNF35
			ZNF385D
			ZNF415
			ZNF419
			ZNF423
			ZNF43
			ZNF467
			ZNF493
			ZNF557
			ZNF593
			ZNF652
			ZNF668
			ZNF682
			ZNF862
			ZNF91

## Sheet: LASSO
Candidate genes screened by LASSO regression algorithm	genes
	S100A12
	TMPRSS11D
	SERPINB13
	GZMB
	RHCG
	PRKCQ
	CRABP2
	HERC6
	VNN1
	CLEC7A
	SLC7A11
	CHRNA9
	CRIP1
	RSAD2
	ISG15
	ASF1B
	NCAPG
	HS3ST3A1
	CXCL13
	OTUB2
	PYCARD
